# Supplementary material for: Synthesis of Unprecedented 4d/4f‐Polypnictogens
Source: PubMed Central journal article supplement — Chemistry. 2021 Jan 14;27(12):3974–8. doi: 10.1002/chem.202003905 (PMC7986065; doi:10.1002/chem.202003905), 2021-01-14
Supplement: CHEM-27-3974-s001.pdf [file CHEM-27-3974-s001.pdf]

# Chemistry–A European Journal

Supporting Information

## Synthesis of Unprecedented 4d/4f-Polypnictogens

Niklas Reinfandt,<sup>[a]</sup> Christoph Schoo,<sup>[a]</sup> Luis Dütsch,<sup>[b]</sup> Ralf Köppe,<sup>[a]</sup> Sergey N. Konchenko,<sup>[a, c]</sup>  
Manfred Scheer,<sup>[b]</sup> and Peter W. Roesky\*<sup>[a]</sup>

## General Methods:

All manipulations of water- and air-sensitive compounds were performed with exclusion of moisture and oxygen in flame-dried Schlenk-type glassware either on a dual manifold Schlenk line, interfaced to a high vacuum ( $10^{-3}$  mbar) line or in an argon-filled MBraun glove box.

Tetrahydrofuran was distilled under nitrogen from potassium benzophenoneketyl before storage in vacuo over  $\text{LiAlH}_4$ . Hydrocarbon solvents were dried by using an MBraun solvent purification system (SPS 800), degassed and stored *in vacuo* over  $\text{LiAlH}_4$ . Elemental analysis were carried out with an Elementar Vario Micro cube. IR spectra were obtained on a Bruker Tensor 37 spectrometer equipped with a room temperature DLaTGS detector and a diamond ATR (attenuated total reflection) unit.

$[\{\text{Cp}^t(\text{CO})_2\text{Mo}\}_2(\mu, \eta^{2:2}\text{-As}_2)]$  and  $[\{\text{Cp}^t(\text{CO})_2\text{Mo}\}_2(\mu, \eta^{2:2}\text{-Sb}_2)]$  were synthesized at the University of Regensburg using following analytical equipment:

The IR spectra were recorded as solids using a ThermoFisher Nicolet iS5 FT-IR spectrometer with an iD7 ATR module and an ITX Germanium or Diamond crystal. The mass spectra and elemental analyses were performed by the analytical laboratories of the University of Regensburg. NMR spectra were recorded in  $\text{C}_6\text{D}_6$  on a Bruker Avance 300 MHz NMR spectrometer ( $^1\text{H}$ : 300.132 MHz,  $^{13}\text{C}$ : 75.468 MHz) or a Bruker Avance 400 MHz NMR spectrometer ( $^1\text{H}$ : 400.130 MHz,  $^{13}\text{C}$ : 100.613 MHz) with external references of  $\text{SiMe}_4$  ( $^1\text{H}$ ,  $^{13}\text{C}$ ).

$[(\text{Cp}^*)_2\text{Sm}(\text{thf})_2]$  and  $[(\text{Cp}^{\text{Me}4\text{nPr}})_2\text{Sm}]$  were prepared following literature procedures.<sup>1,2</sup>  $[(\text{Cp}^*)_2\text{Sm}(\text{thf})_2]$  was sublimed to generate solvent free  $[(\text{Cp}^*)_2\text{Sm}]$ .

**Synthesis of  $[\{\text{Cp}^t(\text{CO})_2\text{Mo}\}_2(\mu, \eta^{2:2}\text{-As}_2)]$ :**

250 ml of a saturated solution of yellow arsenic in boiling xylene were transferred onto  $[\text{Cp}^t(\text{CO})_2\text{Mo}]_2$  (0.81 g, 1.48 mmol) and refluxed for 4 h yielding an orange brown solution. The xylene was condensed off, the residue dissolved in 15 mL  $\text{CH}_2\text{Cl}_2$ , combined with 10 g silica gel and dried till a flowing dark brown powder was formed. Chromatographic work-up (4 x 15 cm; silica gel) with pure *n*-hexane affords a yellow fraction of  $[\text{Cp}^t(\text{CO})_2\text{Mo}(\eta^3\text{-As}_3)]$ . After elution with a mixture of *n*-hexane/toluene of 5:1 an orange-red fraction of  $[\{\text{Cp}^t(\text{CO})_2\text{Mo}\}_2(\mu, \eta^{2:2}\text{-As}_2)]$  and a small unidentified green fraction (maybe  $[\{\text{Cp}^t(\text{CO})_2\text{Mo}\}_3\text{As}]$ ) were obtained.

**$[\text{Cp}^t(\text{CO})_2\text{Mo}(\eta^3\text{-As}_3)]$ :** Yield: 195 mg (0.39 mmol, 13 % referred to one  $[\text{Cp}^t(\text{CO})_2\text{Mo}]$  fragment)

Anal. calcd. (%) for  $[\text{C}_{11}\text{H}_{13}\text{As}_3\text{MoO}_2]$ : C: 26.53, H: 2.63; found (%): C: 26.68, H: 2.53.

NMR:  $^1\text{H}$  NMR (400 MHz,  $\text{C}_6\text{D}_6$ , 300 K)  $\delta/\text{ppm}$  = 0.93 (s, *t*Bu, 9H), 4.36 (t, 2.4 Hz, Cp, 2H), 4.39 (t, 2.4 Hz, Cp, 2H);  $^{13}\text{C}\{^1\text{H}\}$  NMR (101 MHz,  $\text{C}_6\text{D}_6$ , 300 K)  $\delta/\text{ppm}$  = 31.1 (s, *t*Bu), 31.6 (s, Me), 81.6 (s, Cp (C-H)), 81.8 (s, Cp (C-H)), 120.3 (s, Cp (quart.)), 223.4 (s, CO)

FD-MS ( $\text{CH}_2\text{Cl}_2$ ): Cation  $m/z$  (%): 499.81 (100)

**$[\{\text{Cp}^t(\text{CO})_2\text{Mo}\}_2(\mu, \eta^{2:2}\text{-As}_2)]$ :** Yield: 55 mg (0.08 mmol, 5.4 % referred  $[\text{Cp}^t(\text{CO})_2\text{Mo}]_2$ )

IR (ATR):  $\tilde{\nu}/\text{cm}^{-1}$  = 2098 (w), 2955 (m), 2864 (w), 1965 (vs), 1934 (vs), 1893 (vs), 1872 (vs), 1478 (m), 1461 (m), 1444 (w), 1398 (w), 1360 (m), 1269 (m), 1197 (w), 1148 (m), 1060 (w), 1040 (w), 1019 (w), 921 (w), 906 (w), 880 (w), 842 (m), 830 (m), 815 (s), 801 (s), 673 (w)

Anal. calcd. (%) for  $[\text{C}_{22}\text{H}_{26}\text{As}_2\text{Mo}_2\text{O}_4]$ : C: 37.96, H: 3.76; found (%): C: 37.42, H: 3.50.

NMR:  $^1\text{H}$  NMR (300 MHz,  $\text{C}_6\text{D}_6$ , 300 K)  $\delta/\text{ppm}$  = 1.06 (s, *t*Bu, 18H), 4.61 (t, 2.4 Hz, Cp, 4H), 4.75 (t, 2.4 Hz, Cp, 4H);  $^{13}\text{C}\{^1\text{H}\}$  NMR (75 MHz,  $\text{C}_6\text{D}_6$ , 300 K)  $\delta/\text{ppm}$  = 31.3 (s, *t*Bu), 31.8 (s, Me), 83.0 (s, Cp (C-H)), 84.8 (s, Cp (C-H)), 119.0 (s, Cp (quart.)), 228.5 (s, CO)

FD-MS ( $\text{CH}_2\text{Cl}_2$ ): Cation  $m/z$  (%): 695.86 (100)  $[\text{M}^+]$ ; 789.72 (55) [not assignable]

### Synthesis of $[\{\text{Cp}^t(\text{CO})_2\text{Mo}\}_2(\mu, \eta^{2:2}\text{-Sb}_2)]$ :

Yellow  $(t\text{BuSb})_4$  (1.25 g, 1.75 mmol) and dark brown  $[\text{Cp}^t(\text{CO})_2\text{Mo}]_2$  (1.30 g, 2.38 mmol) were weighted into a 250 mL round flask and dissolved in 100 mL toluene. The dark orange brown solution was stirred under reflux for 6 h. Afterwards the solvent was removed, the residue dissolved in 15 mL  $\text{CH}_2\text{Cl}_2$ , combined with 10 g silica gel, dried to a flowing dark brown powder under reduced pressure, and placed on a chromatography column (4 x 20 cm; silica gel). Elution with *n*-hexane yields a light yellow fraction of unreacted  $(t\text{BuSb})_4$ . Thereafter, a dark red fraction of  $[\{\text{Cp}^t(\text{CO})_2\text{Mo}\}_2(\mu, \eta^{2:2}\text{-Sb}_2)]$  was isolated by elution with a mixture of *n*-hexane and toluene (3:1). The solvent was removed and recrystallisation in 5 mL  $\text{CH}_2\text{Cl}_2$  at  $-30\text{ }^\circ\text{C}$  for 5 days afforded dark red crystals.

Yield: 106 mg (0.14 mmol, 6 %)

IR (ATR):  $\tilde{\nu}/\text{cm}^{-1} = 2983$  (w), 2965 (w), 2943 (w), 2902 (w), 1918 (vs), 1890 (vs), 1866 (vs), 1842 (w), 1476 (w), 1462 (w), 1443 (w), 1400 (w), 1362 (w), 1269 (w), 1147 (w), 1058 (w), 1041 (w), 1020 (w), 904 (w), 883 (w), 842 (w), 831 (w), 818 (w), 804 (w), 682 (w)

Anal. calcd. (%) for  $[\{\text{C}_9\text{H}_{13}(\text{CO})_2\text{Mo}\}_2\text{Sb}_2]$ : C: 33.45, H: 3.32; found (%): C: 33.61, H: 3.34.

NMR:  $^1\text{H}$  NMR (400 MHz,  $\text{C}_6\text{D}_6$ , 300 K)  $\delta/\text{ppm} = 1.08$  (s, *t*Bu, 9H), 4.43 (t, 2.4 Hz, Cp, 2H), 4.75 (t, 2.4 Hz, Cp, 2H);  $^{13}\text{C}\{^1\text{H}\}$  NMR (101 MHz,  $\text{C}_6\text{D}_6$ , 300 K)  $\delta/\text{ppm} = 31.4$  (s, *t*Bu), 31.9 (s, Me), 81.1 (s, Cp (C-H)), 81.4 (s, Cp (C-H)), 116.8 (s, Cp (quart.)), 228.7 (s, CO)

LIFDI-MS (toluene): Cation  $m/z$  (%): 789.78 (100)

### Synthesis of $[(\text{Cp}^*{}_2\text{Sm})_2\text{As}_2(\text{Cp}^t\text{Mo}(\text{CO})_2)_2]$ (**1**):

*n*-Hexane (10 mL) was condensed onto a mixture of  $[\text{Cp}^*{}_2\text{Sm}]$  (52.0 mg, 0.12 mmol, 2.00 equiv.) and  $[\{\text{Cp}^t(\text{CO})_2\text{Mo}\}_2(\mu, \eta^{2:2}\text{-As}_2)]$  (45.0 mg, 0.062 mmol, 1.00 equiv.) at  $-78\text{ }^\circ\text{C}$  in a double ampule. The resulting reaction mixture was heated to  $65\text{ }^\circ\text{C}$  in an oven and after 3 days hot decanted. Crystals of **1** were obtained by slow evaporation of the solvent at ambient temperature to the other section of the ampule. Yield: 33.0 mg (34 %) of crystals.

IR (ATR):  $\tilde{\nu}/\text{cm}^{-1} = 2958$  (s), 2929 (s), 2904 (s), 2853 (s), 1968 (m), 1944 (s), 1896 (vs), 1859 (s), 1620 (m), 1575 (m), 1482 (vw), 1463 (vw), 1445 (w), 1437 (w), 1378 (vw), 1362 (w), 1271 (vw), 1149 (vw), 1082 (vw), 1061 (vw), 1019 (vw), 841 (vw), 814 (vw), 792 (w), 677 (vw), 589 (vw), 558 (vw), 533 (vw), 485 (vw), 459 (vw).

NMR:  $^1\text{H}$  NMR (400 MHz,  $\text{C}_6\text{D}_6$ , 300 K)  $\delta/\text{ppm}$  = -1.11 (s, *t*Bu, 9H), 1.08 (s, Cp-*Me*, 60H), 3.81 (t, 2.2 Hz, Cp, 2H), 5.35 (t, 2.2 Hz, Cp, 2H);  $^{13}\text{C}\{^1\text{H}\}$  NMR (101 MHz,  $\text{C}_6\text{D}_6$ , 300 K)  $\delta/\text{ppm}$  = 20.6 (s, Cp-*Me*), 30.0 (s, *CMe*<sub>3</sub>), 30.1 (s, *CMe*<sub>3</sub>), 88.5 (s, Cp (C-H)), 96.0 (s, Cp (C-H)), 118.7 (s, Cp\*), 119.7 (s, Cp (quart.)), 274.8 (s, CO)

Anal. calcd. (%) for [ $\text{C}_{62}\text{H}_{86}\text{Mo}_2\text{O}_4\text{As}_2\text{Sm}_2$ ] (1537.81 g/mol<sup>-1</sup>): C 48.42, H 5.64; found C 48.95, H 5.68.

### Synthesis of $[(\text{Cp}^{\text{Me4nPr}})_2\text{Sm}]_2\text{As}_2(\text{Cp}^t\text{Mo}(\text{CO})_2)_2$ and $[(\text{Cp}^{\text{Me4nPr}})_2\text{Sm}]_2\text{As}_4(\text{Cp}^t\text{Mo}(\text{CO})_2)_2$ (**2,3**):

*n*-Heptane (10 mL) was added onto a mixture of [ $\text{Cp}^{\text{Me4nPr}}_2\text{Sm}$ ] (65.6 mg, 0.137 mmol, 2.00 equiv.) and  $[\{\text{Cp}^t(\text{CO})_2\text{Mo}\}_2(\mu, \eta^{2:2}\text{-As}_2)]$  (50.0 mg, 0.069 mmol, 1.00 equiv.). The resulting reaction mixture was heated to 65 °C and stirred for 72 h. After cooling to rt the mixture was filtered. A crystal mixture of **2** and **3** was obtained by slow evaporation of the solvent at ambient temperature. Yield: 60.0 mg of mixed crystals of **2** and **3**.

Separation and further analytics of the two products (**2, 3**) was not feasible due to similar solubility behavior.

### Synthesis of $[(\text{Cp}^*_2\text{Sm})_2\text{Sb}_4(\text{Cp}^t\text{Mo}(\text{CO})_2)_2]$ (**4**):

#### Method A:

*n*-Hexane (10 mL) was condensed onto a mixture of [ $\text{Cp}^*_2\text{Sm}$ ] (32.0 mg, 0.076 mmol, 2.00 equiv.) and  $[\{\text{Cp}^t\text{Mo}(\text{CO})_2\}_2(\mu, \eta^{2:2}\text{-Sb}_2)]$  (30.0 mg, 0.038 mmol, 1.00 equiv.) at -78 °C in a double ampule. The resulting reaction mixture was heated to 60 °C in an oven and hot decanted after 3 days. After cooling to room temperature crystals of **4** were obtained. Yield: 48.0 mg (67%) of crystals.

#### Method B:

Toluene (10 mL) was condensed onto a mixture of [ $\text{Cp}^*_2\text{Sm}$ ] (42.0 mg, 0.10 mmol, 2.00 equiv.) and  $[\{\text{Cp}^t\text{Mo}(\text{CO})_2\}_2(\mu, \eta^{2:2}\text{-Sb}_2)]$  (40.0 mg, 0.05 mmol, 1.00 equiv.) at -78 °C in a double ampule. The resulting reaction mixture was heated to 60 °C in an oven and after 3 days hot decanted. Crystals of **4** were obtained by slow evaporation of the solvent at ambient temperature to the other section of the ampule. Yield: 52.0 mg (52%) of crystals.

IR (ATR):  $\tilde{\nu}/\text{cm}^{-1}$  = 3243 (vw), 2955 (s), 2900 (s), 2855 (s), 2725 (w), 1898 (vs), 1889 (vs), 1858 (m), 1701 (vw), 1633 (s), 1480 (m), 1445 (m), 1435 (m), 1378 (m), 1358 (m), 1272 (m), 1148 (w), 1060 (vw), 1038 (vw), 1019 (w), 903 (w), 858 (w), 811 (w), 792 (m), 612 (w), 577 (w), 556 (m), 477 (w), 459 (w).

Anal. calcd. (%) for  $[\text{C}_{62}\text{H}_{86}\text{Mo}_2\text{O}_4\text{Sb}_4\text{Sm}_2]$  (1874.88 g/mol<sup>-1</sup>): C 39.72, H 4.62; found C 39.70, H 4.87.

Due to paramagnetism and decomposition upon redissolving single crystals of **4**, no suitable NMR spectra were obtainable.

#### **Synthesis of $[[(\text{Cp}^{\text{Me}4\text{nPr}})_2\text{Sm}]_2\text{Sb}_4(\text{Cp}^{\text{t}}\text{Mo}(\text{CO})_2)_2]$ (**5**):**

Toluene (10 mL) was added onto a mixture of  $[\text{Cp}^{\text{Me}4\text{nPr}}_2\text{Sm}]$  (60.4 mg, 0.127 mmol, 2.00 equiv.) and  $[\{\text{Cp}^{\text{t}}\text{Mo}(\text{CO})_2\}_2(\mu,\eta^{2:2}\text{-Sb}_2)]$  (50.0 mg, 0.063 mmol, 1.00 equiv.). The resulting reaction mixture was heated to 75 °C and stirred for 72 h. After cooling to rt the solvent was removed under reduced pressure and the solid subsequently recrystallized from hot *n*-heptane. Yield: 20 mg (31 %) of crystals.

IR (ATR):  $\tilde{\nu}/\text{cm}^{-1}$  = 2955 (s), 2928 (s), 2899 (s), 2868 (s), 2851 (s), 2724 (w), 1896 (vs), 1857 (m), 1630 (s), 1481 (m), 1464 (m), 1434 (m), 1380 (m), 1360 (m), 1268 (w), 1147 (w), 1089 (w), 1038 (w), 1019 (w), 907 (w), 886 (w), 808 (w), 785 (m), 614 (w), 575 (w), 555 (m), 478 (w), 455 (m).

Anal. calcd. (%) for  $[\text{C}_{70}\text{H}_{102}\text{Mo}_2\text{O}_4\text{Sb}_4\text{Sm}_2]$  (1987.20 g/mol<sup>-1</sup>): C 42.31, H 5.17; found C 41.73, H 5.05.

Due to paramagnetism and decomposition upon redissolving single crystals of **5**, no suitable NMR spectra were obtainable.

## IR Spectra:

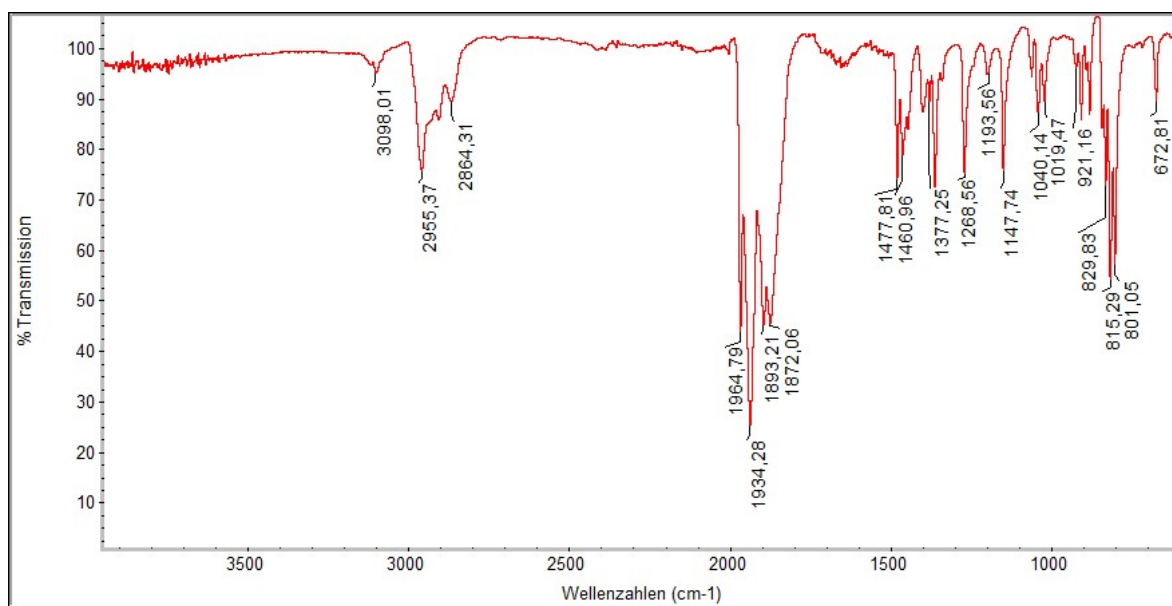

**Fig. S1.** IR Spectrum of  $[\{\text{Cp}^t(\text{CO})_2\text{Mo}\}_2(\mu, \eta^{2:2}\text{-As}_2)]$ .

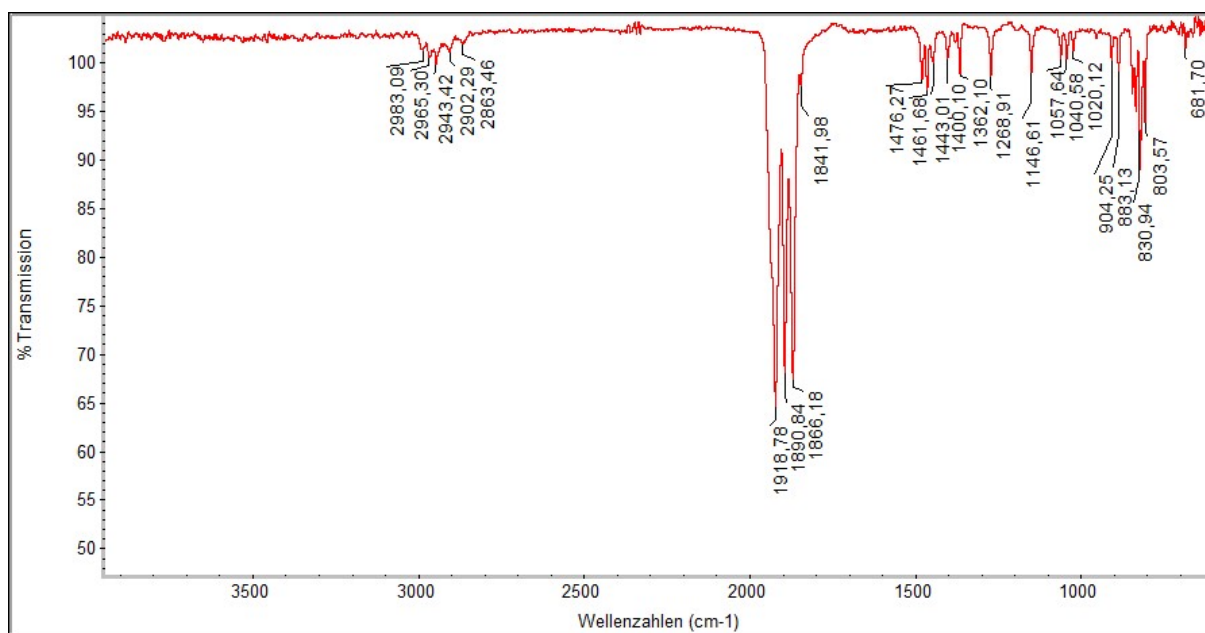

**Fig. S2.** IR Spectrum of  $[\{\text{Cp}^t(\text{CO})_2\text{Mo}\}_2(\mu, \eta^{2:2}\text{-Sb}_2)]$ .

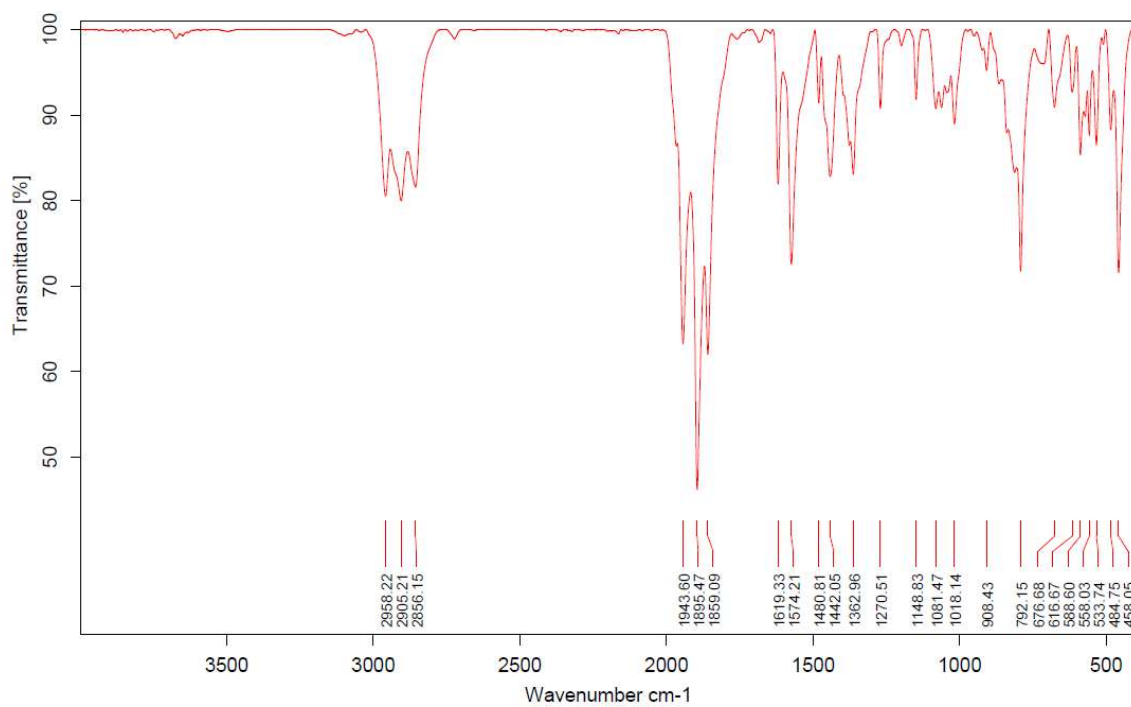

**Fig. S3.** IR Spectrum of **1** ( $[(Cp^*_2Sm)_2As_2(Cp^tMo(CO)_2)_2]$ ).



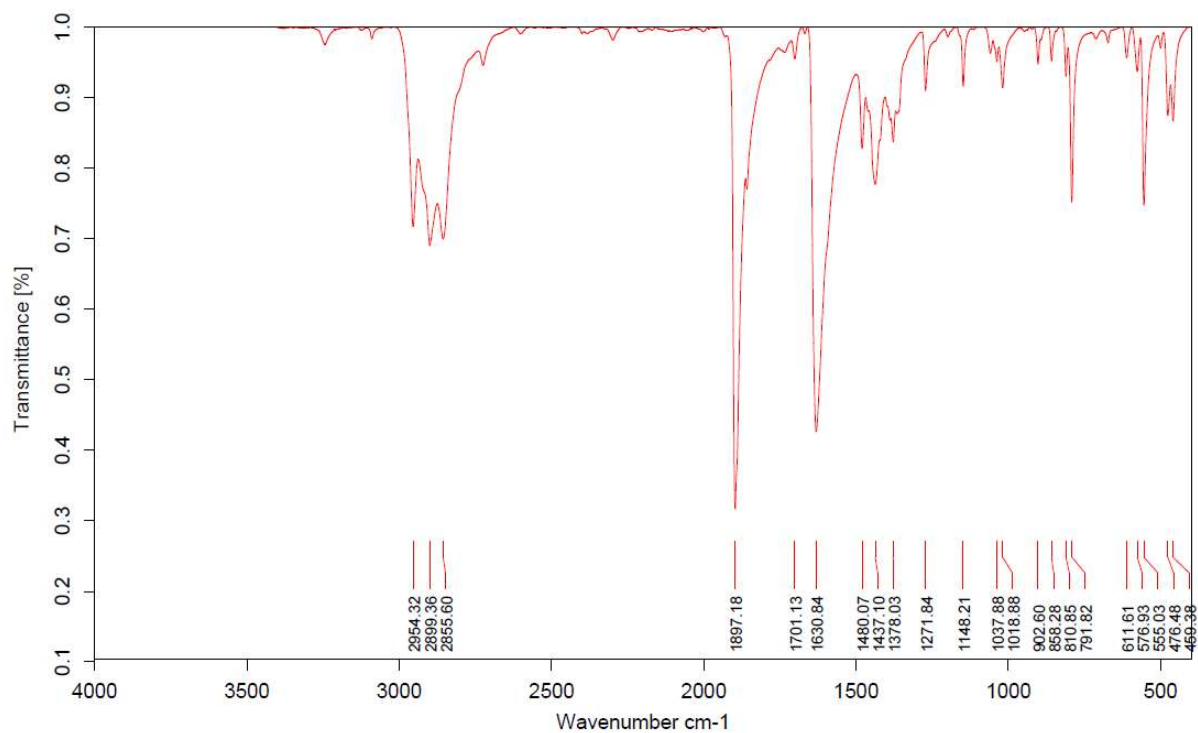

**Fig. S4.** IR Spectrum of **4** ( $[(Cp^*_2Sm)_2Sb_4(Cp^tMo(CO)_2)_2]$ ).

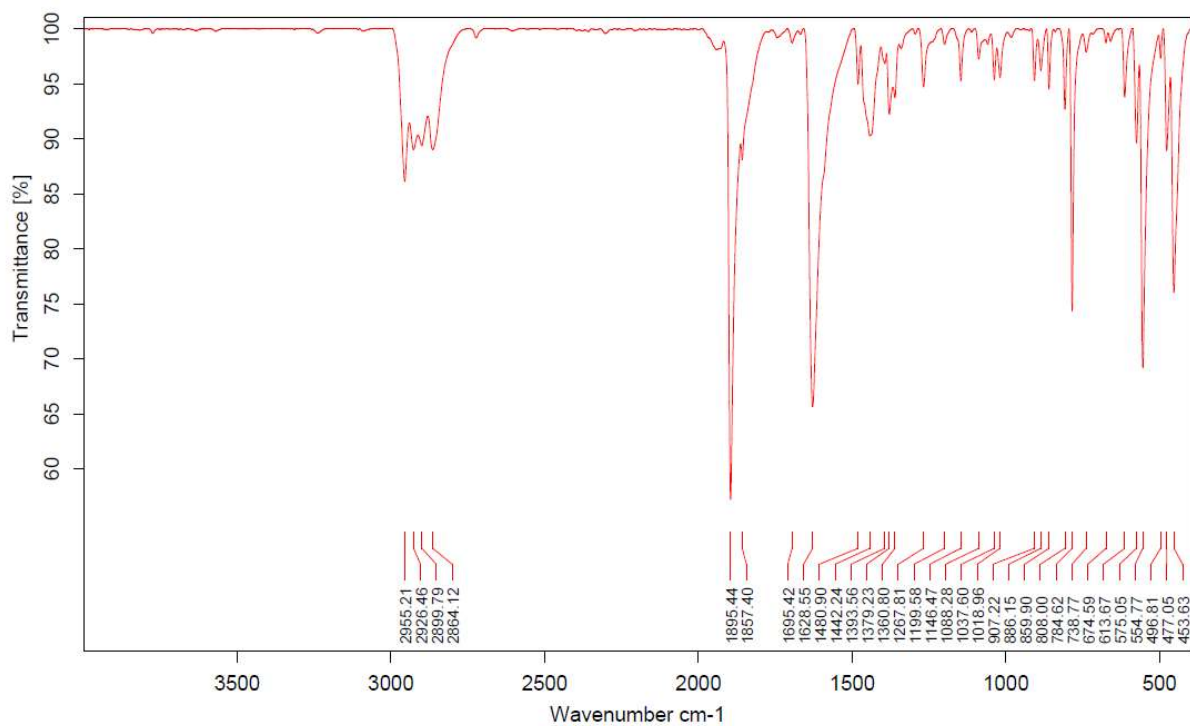

**Fig. S5.** IR Spectrum of **5** ( $[(Cp^{Me4nPr})_2Sm)_2Sb_4(Cp^tMo(CO)_2)_2]$ ).

**NMR Spectra:**

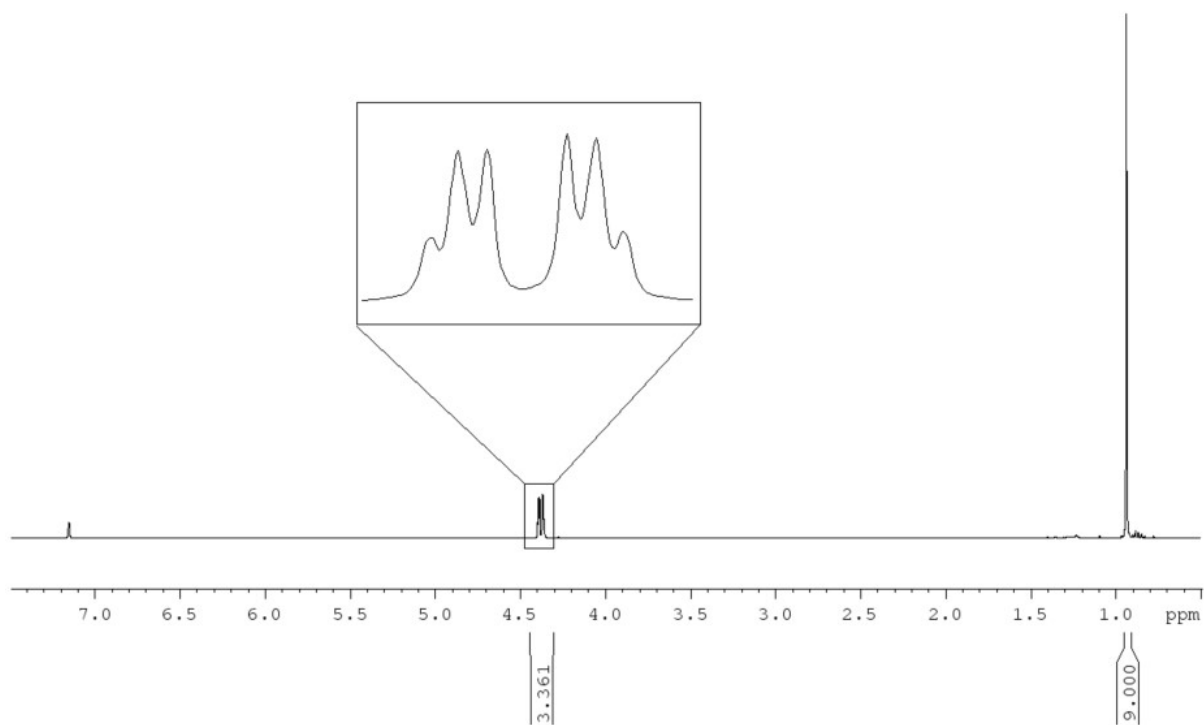

**Fig. S6.**  $^1\text{H}$ -NMR Spectrum of  $[\text{Cp}^t(\text{CO})_2\text{Mo}(\eta^3\text{-As}_3)]$ .

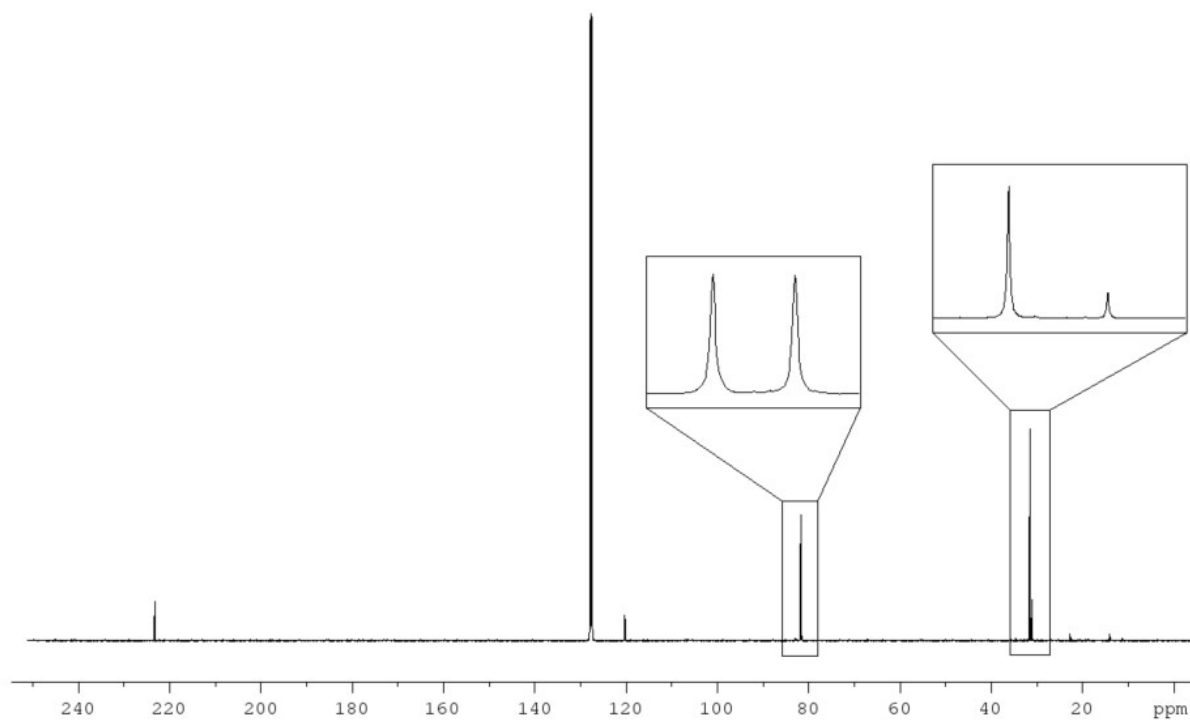

**Fig. S7.**  $^{13}\text{C}\{^1\text{H}\}$ -NMR Spectrum of  $[\text{Cp}^t(\text{CO})_2\text{Mo}(\eta^3\text{-As}_3)]$ .

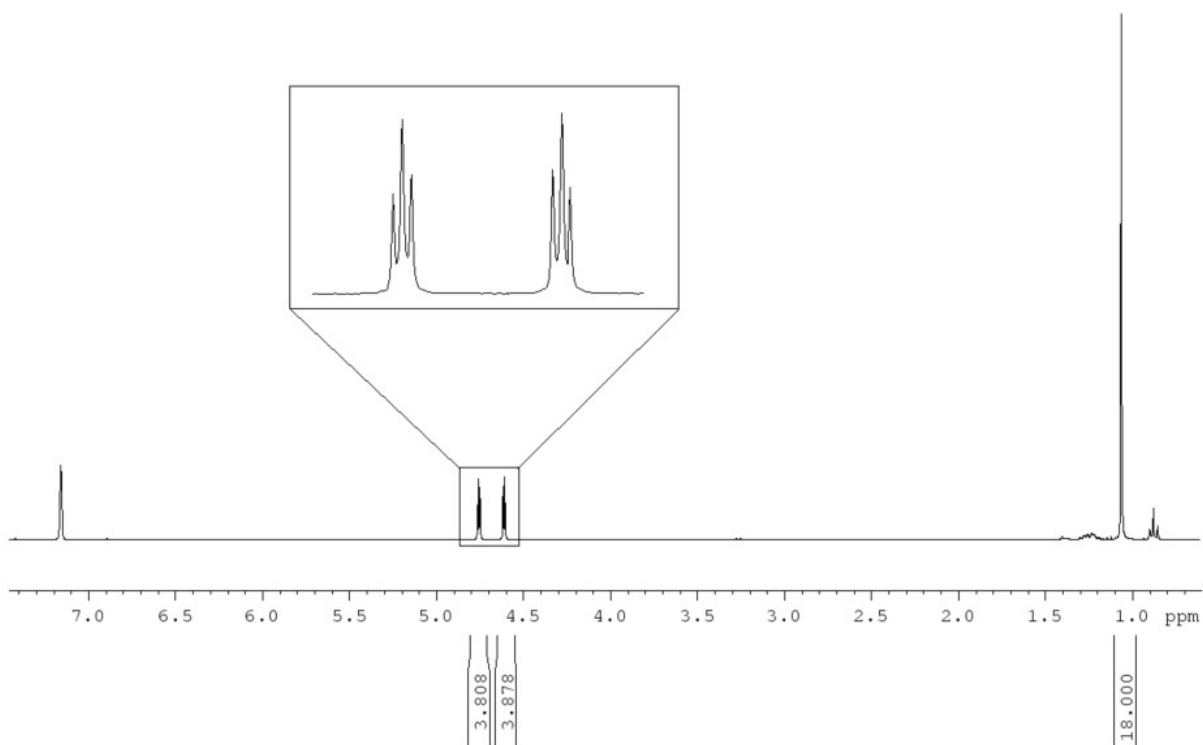

**Fig. S8.**  $^1\text{H-NMR}$  Spectrum of  $[\{\text{Cp}^t(\text{CO})_2\text{Mo}\}_2(\mu,\eta^{2:2}\text{-As}_2)]$ .

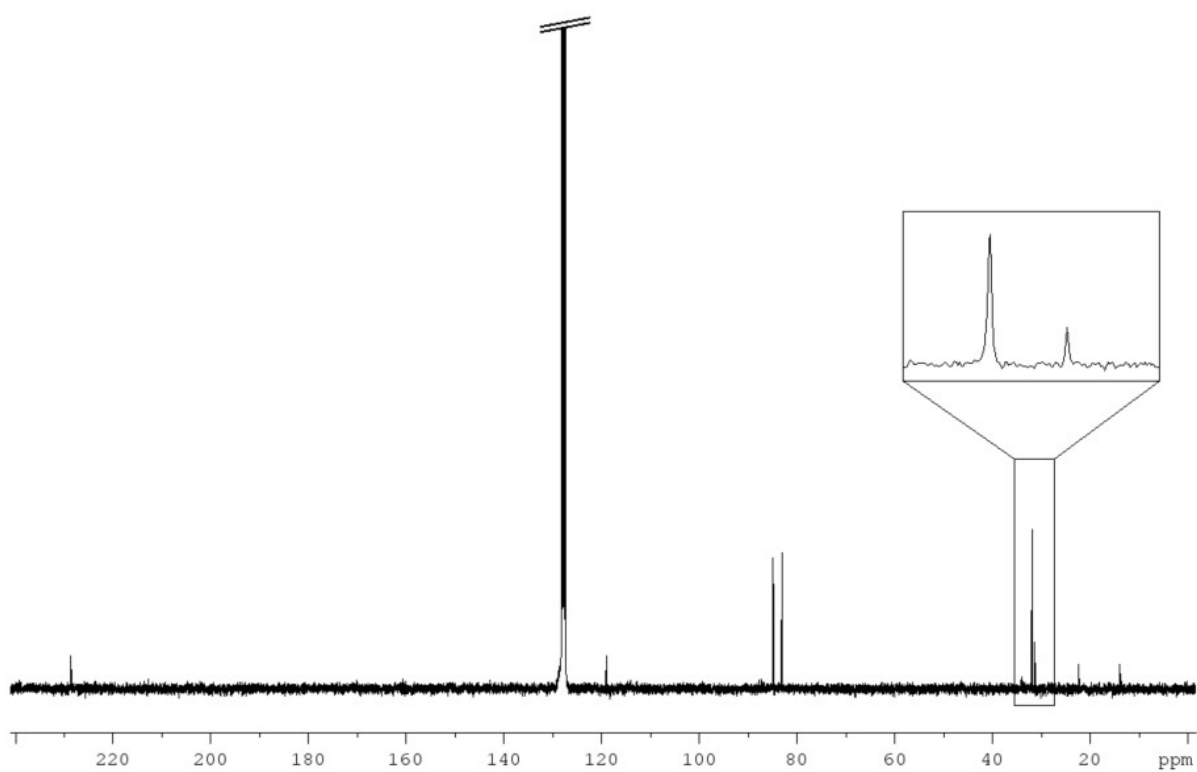

**Fig. S9.**  $^{13}\text{C}\{^1\text{H}\}$ -NMR Spectrum of  $[\{\text{Cp}^t(\text{CO})_2\text{Mo}\}_2(\mu,\eta^{2:2}\text{-As}_2)]$ .

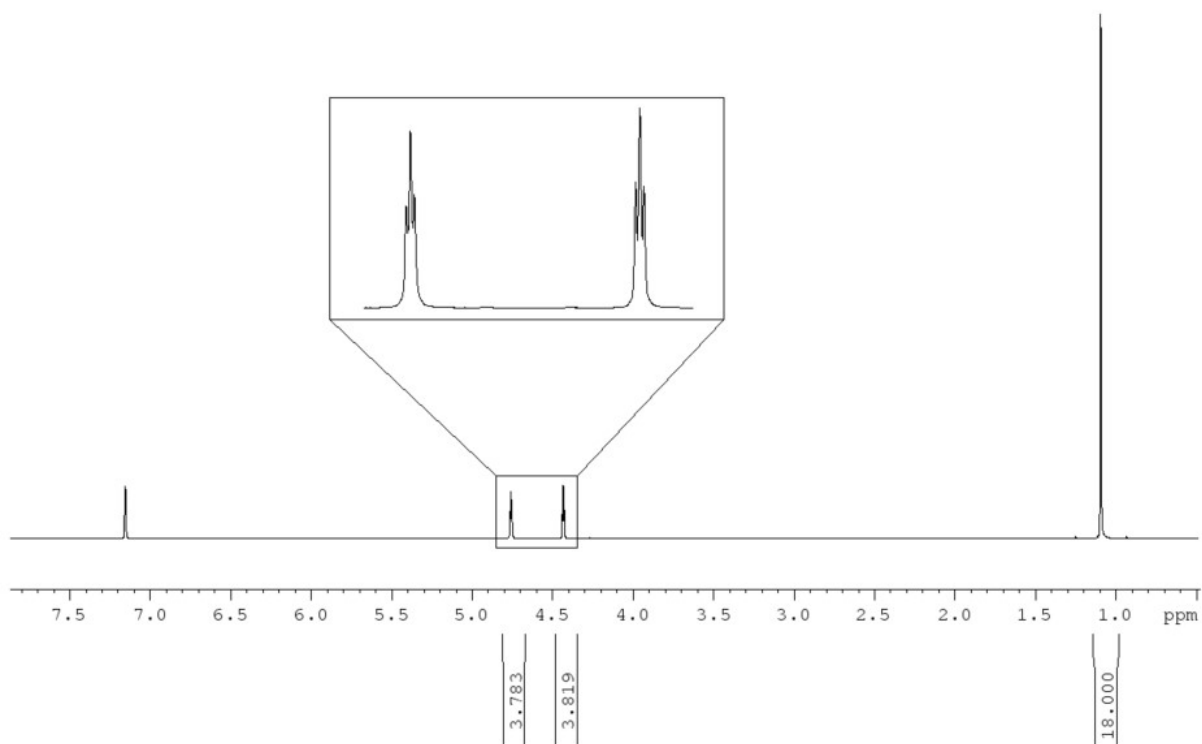

**Fig. S10.**  $^1\text{H}$ -NMR Spectrum of  $[\{\text{Cp}^t(\text{CO})_2\text{Mo}\}_2(\mu,\eta^{2:2}\text{-Sb}_2)]$ .

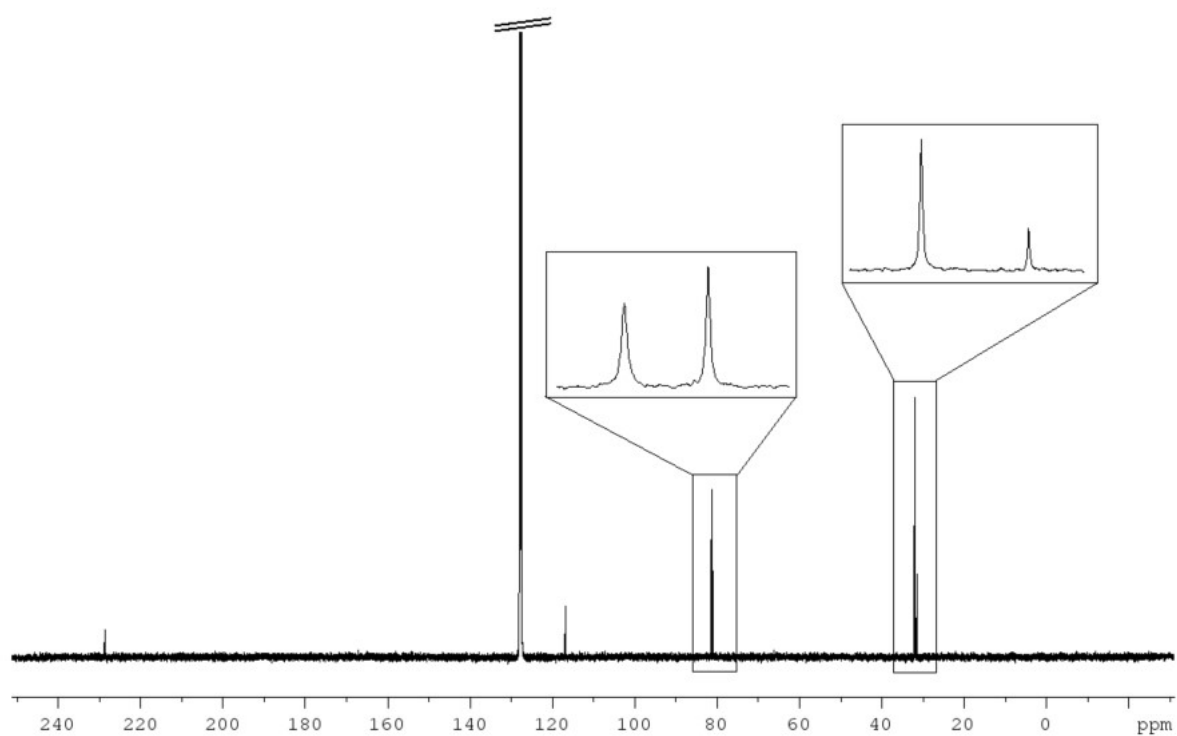

**Fig. S11.**  $^{13}\text{C}\{^1\text{H}\}$ -NMR Spectrum of  $[\{\text{Cp}^t(\text{CO})_2\text{Mo}\}_2(\mu,\eta^{2:2}\text{-Sb}_2)]$ .

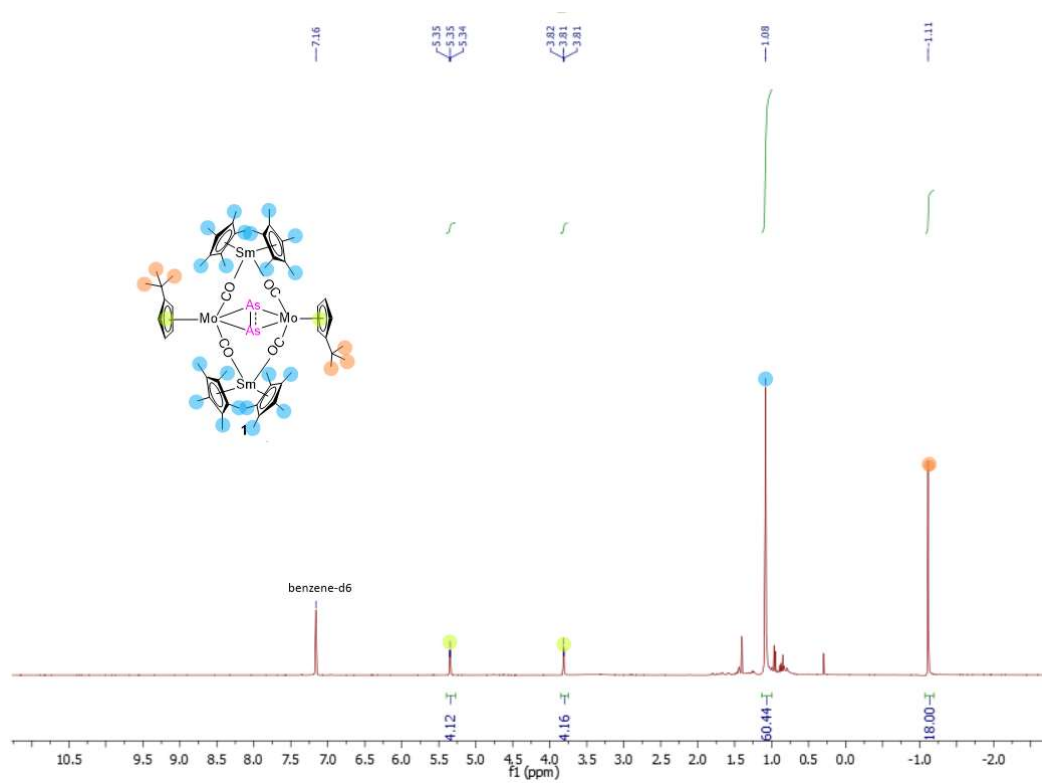

**Fig. S12.**  $^1\text{H-NMR}$  Spectrum of **1**.

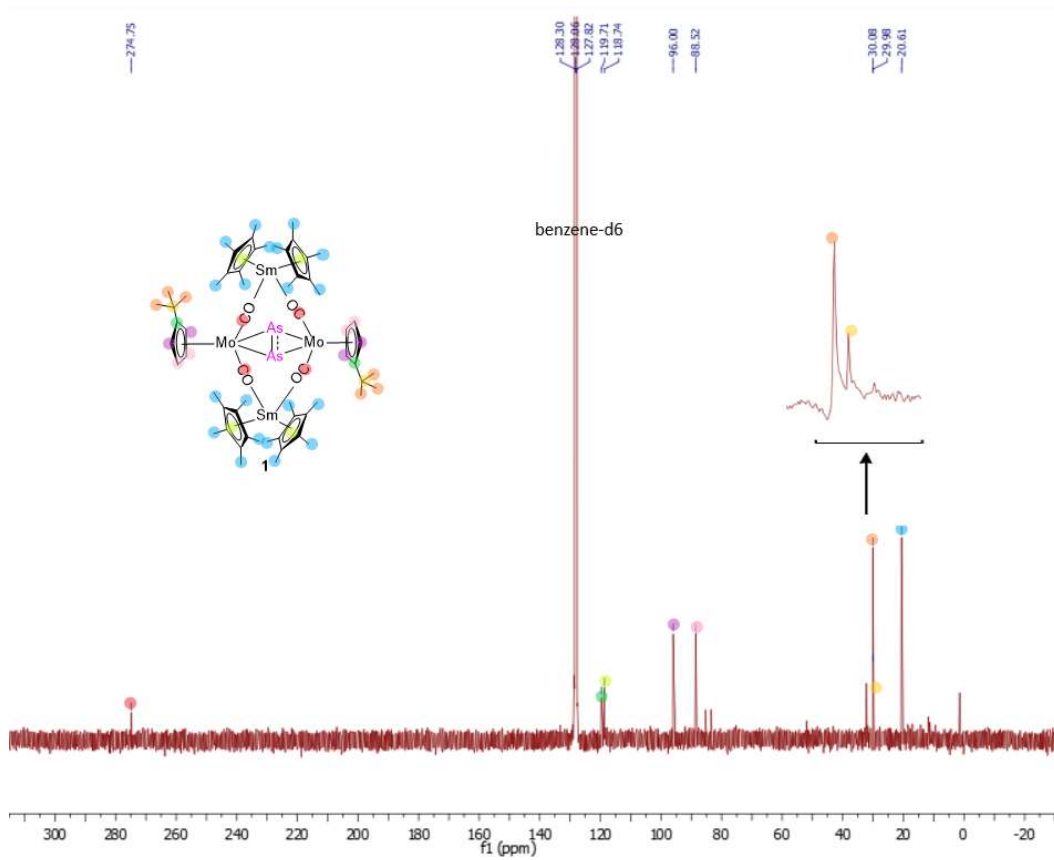

**Fig. S13.**  $^{13}\text{C}\{^1\text{H}\}$ -NMR Spectrum of **1**. All unsigned peaks are traces of decomposition of **1** in solution. Single crystals were dissolved for recording the spectrum.

### **X-ray Crystallographic Studies of (1), (2), (3), (4) and (5):**

A suitable crystal was covered in mineral oil (Aldrich) and mounted on a glass fiber. The crystal was transferred directly to the cold stream of a STOE IPDS 2 or a STOE StadiVari diffractometer. All structures were solved by using the program SHELXS/T<sup>3</sup> and Olex2.<sup>4</sup> The remaining non-hydrogen atoms were located from successive difference Fourier map calculations. The refinements were carried out by using full-matrix least-squares techniques on  $F^2$  by using the program SHELXL.<sup>3</sup> In each case, the locations of the largest peaks in the final difference Fourier map calculations, as well as the magnitude of the residual electron densities, were of no chemical significance.

Crystallographic data (excluding structure factors) for the structures reported in this paper have been deposited with the Cambridge Crystallographic Data Centre as a supplementary publication no. 2015996-2016000. Copies of the data can be obtained free of charge on application to CCDC, 12 Union Road, Cambridge CB21EZ, UK (fax: +(44)1223-336-033; email: [deposit@ccdc.cam.ac.uk](mailto:deposit@ccdc.cam.ac.uk)).

### **Refinement Details**

The crystal structure of **1** contains 1.75 molecules of *n*-hexane per molecule. The molecules could not be modeled satisfactorily and were therefore removed from the electron density map using the OLEX2 solvent mask.

The crystal structure of **5** is reproducibly slightly twinned and disordered. No crystals of better quality could be grown. The twinning could not be solved by using twin integration nor applying a twin-matrix. This results in A and B alerts in the cif check. One of the two half molecules in the asymmetric units is disordered by the turning of the Sb<sub>4</sub> unit in a 45 to 55 ratio. This is leading to a disorder with the CO moieties which could be modeled. Additionally,

the crystal structure contains one disordered molecule of toluene in the asymmetric unit which causes alerts dealing with short inter H...H contacts.

**Table S1:** Crystal data and structure refinement of **1**, **2** and **3**.

| Compound                                       | <b>1</b>                                                                                                                  | <b>2</b>                                                                                        | <b>3</b>                                                                                        |
|------------------------------------------------|---------------------------------------------------------------------------------------------------------------------------|-------------------------------------------------------------------------------------------------|-------------------------------------------------------------------------------------------------|
| <b>Formula</b>                                 | C <sub>62</sub> H <sub>86</sub> Mo <sub>2</sub> O <sub>4</sub> As <sub>2</sub> Sm <sub>2</sub> · 1.75<br><i>n</i> -hexane | C <sub>70</sub> H <sub>102</sub> Mo <sub>2</sub> O <sub>4</sub> As <sub>2</sub> Sm <sub>2</sub> | C <sub>70</sub> H <sub>102</sub> Mo <sub>2</sub> O <sub>4</sub> As <sub>4</sub> Sm <sub>2</sub> |
| <i>D</i> <sub>calc.</sub> / g cm <sup>-3</sup> | 1.272                                                                                                                     | 1.570                                                                                           | 1.750                                                                                           |
| <i>μ</i> /mm <sup>-1</sup>                     | 2.598                                                                                                                     | 2.994                                                                                           | 4.022                                                                                           |
| <b>Formula Weight</b>                          | 1537.72                                                                                                                   | 1649.93                                                                                         | 1799.77                                                                                         |
| <b>Colour</b>                                  | clear red                                                                                                                 | red                                                                                             | clear reddish orange                                                                            |
| <b>Shape</b>                                   | irregular                                                                                                                 | irregular                                                                                       | plank                                                                                           |
| <b>Size/mm<sup>3</sup></b>                     | 0.43×0.38×0.34                                                                                                            | 0.38×0.26×0.12                                                                                  | 0.36×0.16×0.05                                                                                  |
| <b>T/K</b>                                     | 150                                                                                                                       | 100                                                                                             | 100                                                                                             |
| <b>Crystal System</b>                          | orthorhombic                                                                                                              | monoclinic                                                                                      | monoclinic                                                                                      |
| <b>Space Group</b>                             | <i>Pccn</i>                                                                                                               | <i>C2/c</i>                                                                                     | <i>P2<sub>1</sub>/n</i>                                                                         |
| <i>a</i> /Å                                    | 25.760(5)                                                                                                                 | 30.778(6)                                                                                       | 17.800(4)                                                                                       |
| <i>b</i> /Å                                    | 32.030(6)                                                                                                                 | 10.050(2)                                                                                       | 9.500(2)                                                                                        |
| <i>c</i> /Å                                    | 19.460(4)                                                                                                                 | 25.375(5)                                                                                       | 20.200(4)                                                                                       |
| <i>α</i> <sup>°</sup>                          | 90                                                                                                                        | 90                                                                                              | 90                                                                                              |
| <i>β</i> <sup>°</sup>                          | 90                                                                                                                        | 117.24(3)                                                                                       | 91.10(3)                                                                                        |
| <i>γ</i> <sup>°</sup>                          | 90                                                                                                                        | 90                                                                                              | 90                                                                                              |
| <i>V</i> /Å <sup>3</sup>                       | 16056(6)                                                                                                                  | 6978(3)                                                                                         | 3415.2(12)                                                                                      |
| <b>Z</b>                                       | 8                                                                                                                         | 4                                                                                               | 2                                                                                               |
| <b>Z'</b>                                      | 1                                                                                                                         | 0.5                                                                                             | 0.5                                                                                             |
| <b>Wavelength/Å</b>                            | 0.71073                                                                                                                   | 0.71073                                                                                         | 0.71073                                                                                         |
| <b>Radiation type</b>                          | MoK <sub>α</sub>                                                                                                          | MoK <sub>α</sub>                                                                                | MoK <sub>α</sub>                                                                                |
| <i>θ</i> <sub>min</sub> <sup>°</sup>           | 1.271                                                                                                                     | 2.587                                                                                           | 2.623                                                                                           |
| <i>θ</i> <sub>max</sub> <sup>°</sup>           | 25.189                                                                                                                    | 29.586                                                                                          | 29.593                                                                                          |
| <b>Measured Refl.</b>                          | 136018                                                                                                                    | 43003                                                                                           | 20036                                                                                           |
| <b>Independent Refl.</b>                       | 14336                                                                                                                     | 8944                                                                                            | 8308                                                                                            |
| <b>Reflections with I &gt; 2(I)</b>            | 12308                                                                                                                     | 7556                                                                                            | 6633                                                                                            |
| <i>R</i> <sub>int</sub>                        | 0.0322                                                                                                                    | 0.0339                                                                                          | 0.0219                                                                                          |
| <b>Parameters</b>                              | 675                                                                                                                       | 374                                                                                             | 383                                                                                             |
| <b>Restraints</b>                              | 0                                                                                                                         | 0                                                                                               | 0                                                                                               |
| <b>Largest Peak</b>                            | 1.001                                                                                                                     | 0.786                                                                                           | 1.119                                                                                           |
| <b>Deepest Hole</b>                            | -0.753                                                                                                                    | -0.399                                                                                          | -0.417                                                                                          |
| <b>Goof</b>                                    | 1.164                                                                                                                     | 1.000                                                                                           | 0.996                                                                                           |
| <i>wR</i> <sub>2</sub> (all data)              | 0.1179                                                                                                                    | 0.0508                                                                                          | 0.0649                                                                                          |
| <i>wR</i> <sub>2</sub>                         | 0.1155                                                                                                                    | 0.0497                                                                                          | 0.0605                                                                                          |
| <i>R</i> <sub>1</sub> (all data)               | 0.0521                                                                                                                    | 0.0282                                                                                          | 0.0428                                                                                          |
| <i>R</i> <sub>1</sub>                          | 0.0464                                                                                                                    | 0.0218                                                                                          | 0.0279                                                                                          |



**Table S2:** Crystal data and structure refinement of **4** and **5**.

| Compound                                       | <b>4</b>                                                                                       | <b>5</b>                                                                                                       |
|------------------------------------------------|------------------------------------------------------------------------------------------------|----------------------------------------------------------------------------------------------------------------|
| <b>Formula</b>                                 | C <sub>62</sub> H <sub>86</sub> Mo <sub>2</sub> O <sub>4</sub> Sb <sub>4</sub> Sm <sub>2</sub> | C <sub>70</sub> H <sub>102</sub> Mo <sub>2</sub> O <sub>4</sub> Sb <sub>4</sub> Sm <sub>2</sub> · 0.25 toluene |
| <i>D</i> <sub>calc.</sub> / g cm <sup>-3</sup> | 1.953                                                                                          | 1.709                                                                                                          |
| $\mu$ /mm <sup>-1</sup>                        | 3.899                                                                                          | 3.190                                                                                                          |
| <b>Formula Weight</b>                          | 1874.88                                                                                        | 2010.12                                                                                                        |
| <b>Colour</b>                                  | clear orange                                                                                   | clear red                                                                                                      |
| <b>Shape</b>                                   | plate                                                                                          | plank                                                                                                          |
| <b>Size/mm<sup>3</sup></b>                     | 0.17×0.16×0.15                                                                                 | 0.34×0.18×0.07                                                                                                 |
| <i>T</i> /K                                    | 100                                                                                            | 210                                                                                                            |
| <b>Crystal System</b>                          | triclinic                                                                                      | triclinic                                                                                                      |
| <b>Space Group</b>                             | <i>P</i> -1                                                                                    | <i>P</i> -1                                                                                                    |
| <i>a</i> /Å                                    | 10.650(3)                                                                                      | 14.6782(5)                                                                                                     |
| <i>b</i> /Å                                    | 10.613(2)                                                                                      | 16.5208(5)                                                                                                     |
| <i>c</i> /Å                                    | 14.627(3)                                                                                      | 18.0566(7)                                                                                                     |
| $\alpha$ <sup>°</sup>                          | 88.52(2)                                                                                       | 83.156(3)                                                                                                      |
| $\beta$ <sup>°</sup>                           | 78.18(2)                                                                                       | 78.367(3)                                                                                                      |
| $\gamma$ <sup>°</sup>                          | 80.17(2)                                                                                       | 65.698(3)                                                                                                      |
| <i>V</i> /Å <sup>3</sup>                       | 1594.5(6)                                                                                      | 3905.5(3)                                                                                                      |
| <i>Z</i>                                       | 1                                                                                              | 2                                                                                                              |
| <i>Z'</i>                                      | 0.5                                                                                            | 1                                                                                                              |
| <b>Wavelength/Å</b>                            | 0.71073                                                                                        | 0.71073                                                                                                        |
| <b>Radiation type</b>                          | MoK $\alpha$                                                                                   | MoK $\alpha$                                                                                                   |
| $\theta$ <sub>min</sub> <sup>°</sup>           | 1.947                                                                                          | 1.354                                                                                                          |
| $\theta$ <sub>max</sub> <sup>°</sup>           | 26.133                                                                                         | 27.175                                                                                                         |
| <b>Measured Refl.</b>                          | 11627                                                                                          | 33430                                                                                                          |
| <b>Independent Refl.</b>                       | 6165                                                                                           | 17178                                                                                                          |
| <b>Reflections with I &gt; 2(I)</b>            | 4840                                                                                           | 10444                                                                                                          |
| <i>R</i> <sub>int</sub>                        | 0.0686                                                                                         | 0.0542                                                                                                         |
| <b>Parameters</b>                              | 347                                                                                            | 841                                                                                                            |
| <b>Restraints</b>                              | 0                                                                                              | 198                                                                                                            |
| <b>Largest Peak</b>                            | 2.367                                                                                          | 5.390                                                                                                          |
| <b>Deepest Hole</b>                            | -2.063                                                                                         | -3.119                                                                                                         |
| <b>Goof</b>                                    | 1.019                                                                                          | 1.040                                                                                                          |
| <i>wR</i> <sub>2</sub> (all data)              | 0.1750                                                                                         | 0.1807                                                                                                         |
| <i>wR</i> <sub>2</sub>                         | 0.1654                                                                                         | 0.1586                                                                                                         |
| <i>R</i> <sub>1</sub> (all data)               | 0.0771                                                                                         | 0.1099                                                                                                         |
| <i>R</i> <sub>1</sub>                          | 0.0645                                                                                         | 0.0601                                                                                                         |



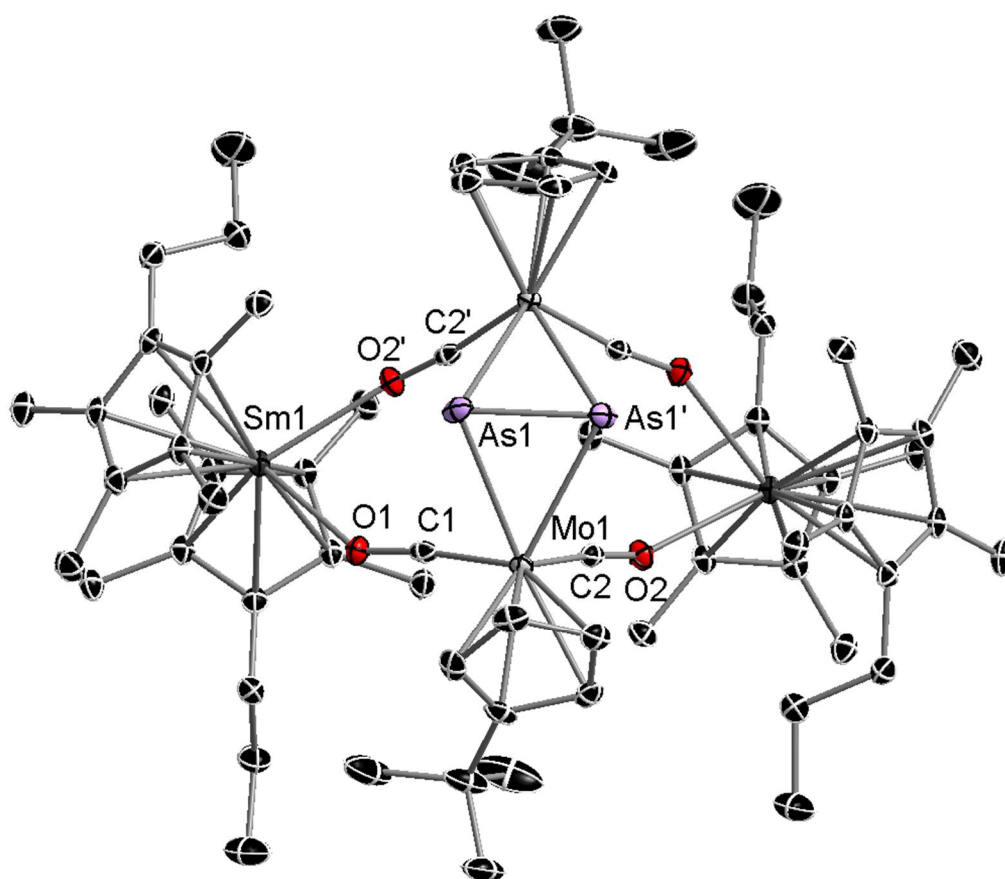

**Fig. S15.** Molecular structure of **2** in the solid state displayed with an ellipsoid probability of 50 %. Hydrogen atoms are omitted for clarity. Selected bond lengths [Å] and angles [°]: Sm1–O1 2.383(2), Sm1–O2' 2.413(2), Mo1–As1 2.7047(5), Mo1–As1' 2.7092(10), Mo1–C1 1.887(2), As1–As1' 2.2411(7), C1–O1 1.212(3), O1–Sm–O2' 74.47(5), Mo1–As1–Mo1' 103.02(2).

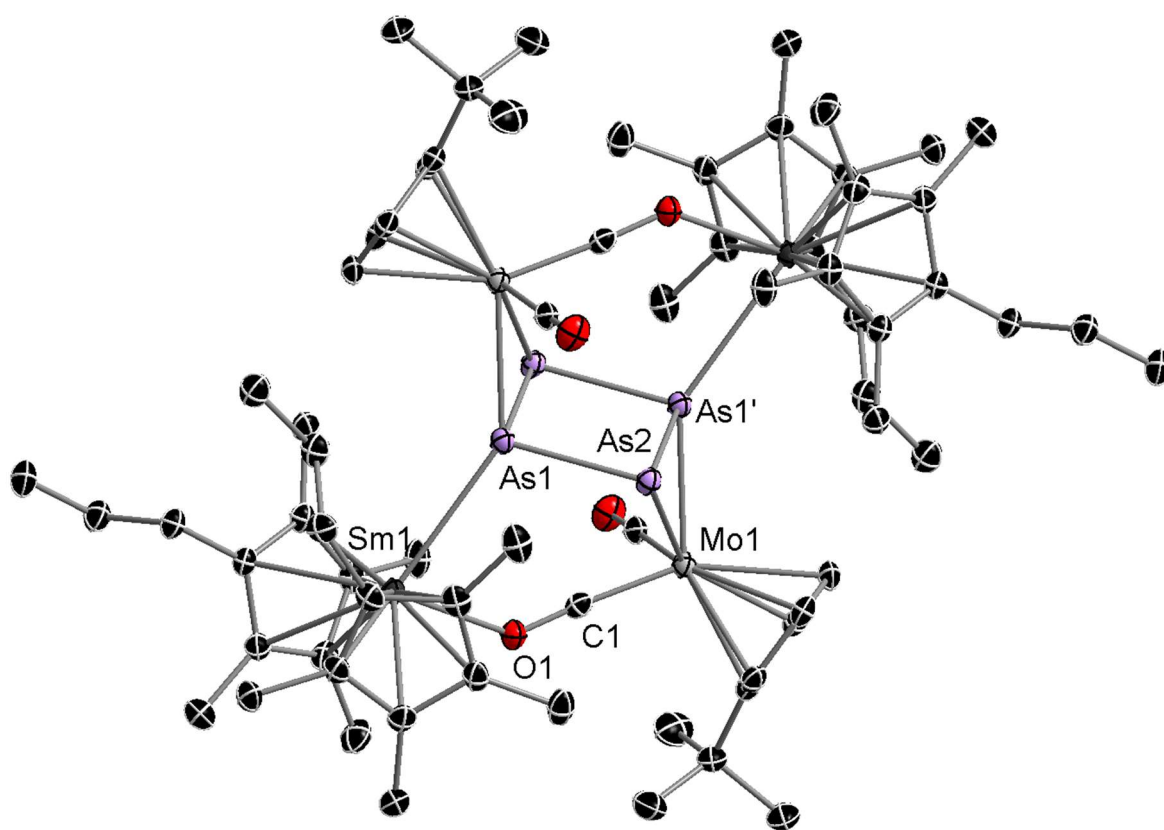

**Fig. S16.** Molecular structure of **3** in the solid state displayed with an ellipsoid probability of 50 %. Hydrogen atoms are omitted for clarity. Selected bond lengths [Å] and angles [°]: Sm1–As1 3.0300(8), Sm1–O1 2.380(2), Mo1–As2 2.6498(7), Mo1–As1' 2.6261(7), Mo1–C1 1.873(3), As1–As2 2.4862(7), As1'–As2 2.3503(6), C1–O1 1.206(4), O1–Sm–As1 76.99(6), As1'–Mo1–As2 52.91(2), Mo1–As1'–Sm1' 142.35(2), As1'–As2–Mo1 63.03(2), As1–As2–Mo1 105.01(3), As2–As1–As2' 91.16(2), As1–As2–As1' 88.84(2).

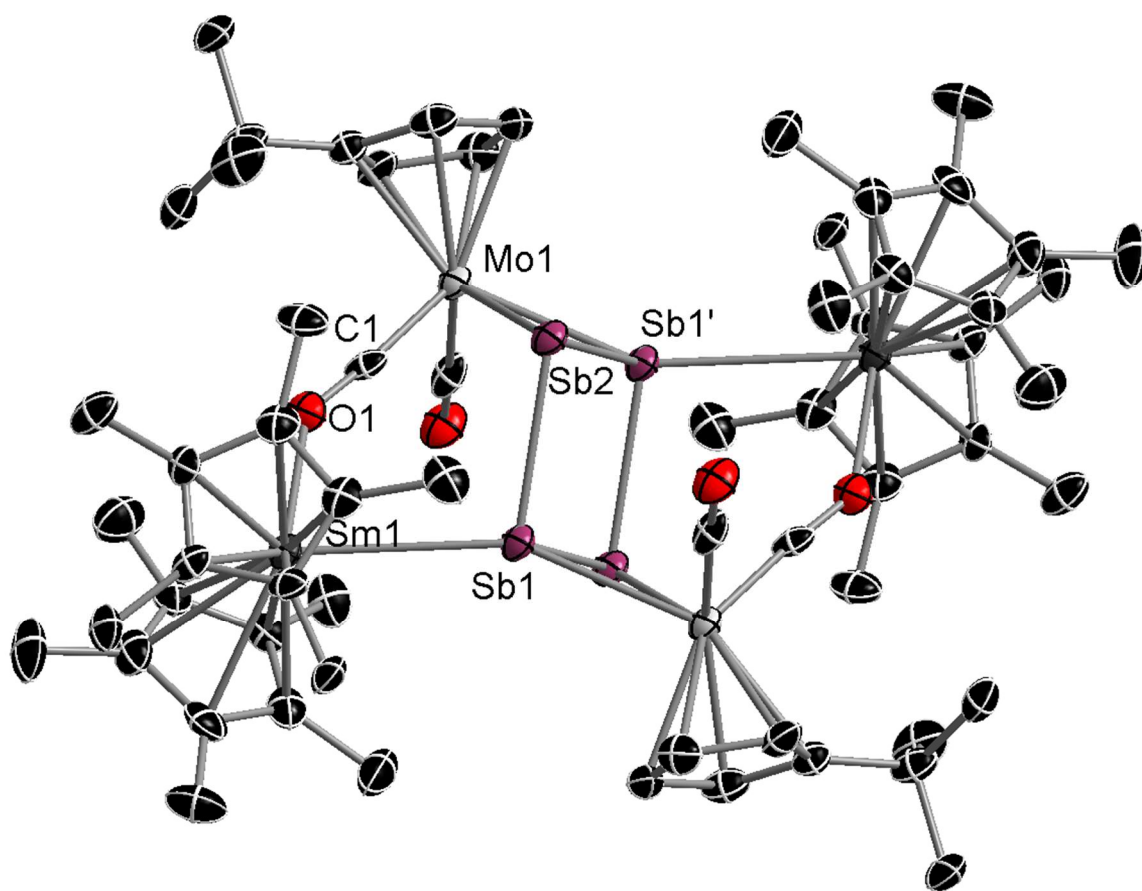

**Fig. S17.** Molecular structure of **4** in the solid state displayed with an ellipsoid probability of 50 %. Hydrogen atoms are omitted for clarity. Selected bond lengths [Å] and angles [°]: Sm1–Sb2' 3.2375(7), Sm1–O1 2.381(6), Mo1–Sb2 2.8146(9), Mo1–Sb1 2.8549(9), Mo1–C1 1.894(8), Sb1–Sb2 2.7313(8), Sb1–Sb2' 2.8608(7), C1–O1 1.209(10), O1–Sm–Sb2' 76.73(14), Sb1–Mo1–Sb2 57.59(2), Mo1–Sb2–Sm1' 153.18(2), Sb1–Sb2–Mo1 61.94(2), Sb2'–Sb1–Mo1 102.32(2), Sb2–Sb1–Sb2' 87.73(2), Sb1–Sb2–Sb1' 92.28(2).

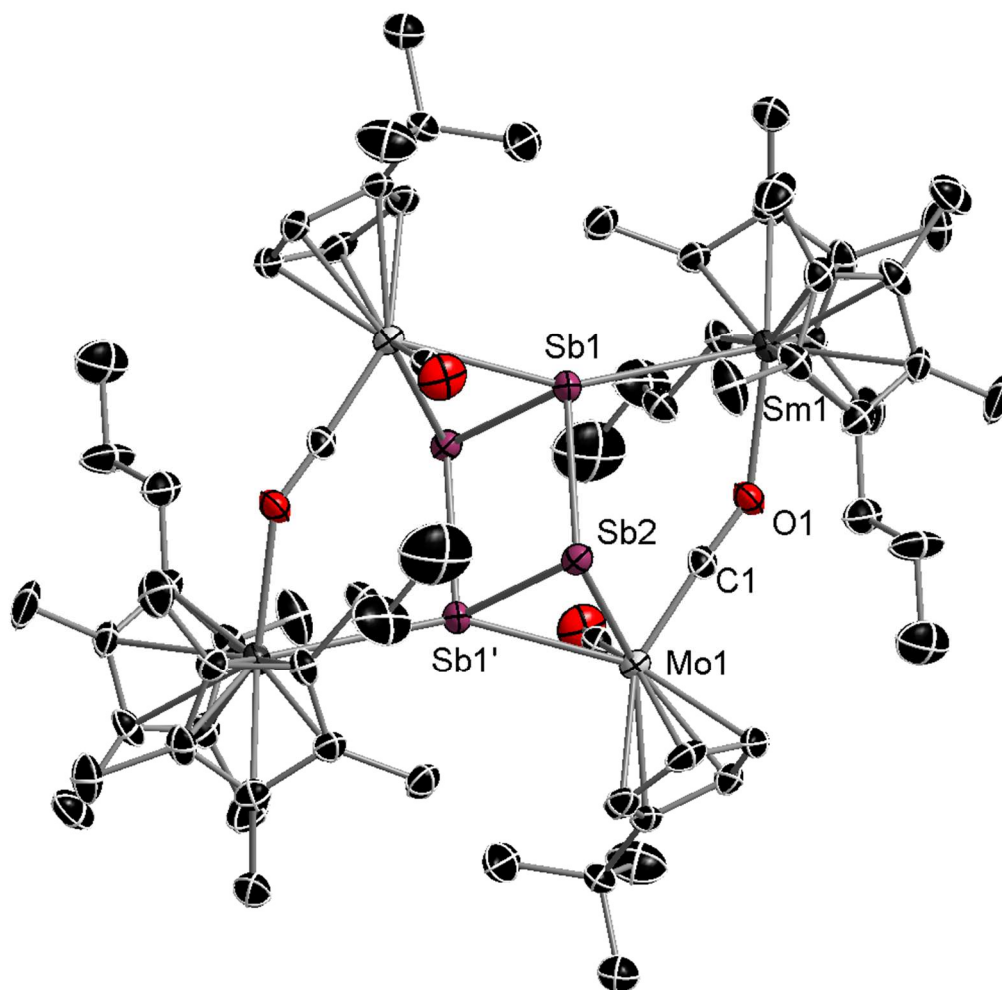

**Fig. S18.** Molecular structure of **5** in the solid state displayed with an ellipsoid probability of 30 %. Hydrogen atoms are omitted for clarity. Selected bond lengths [Å] and angles [°]: Sm1–Sb1 3.2794(8), Sm1–O1 2.386(7), Mo1–Sb2 2.8464(11), Mo1–Sb1' 2.8315(11), Mo1–C1 1.888(10), Sb1–Sb2 2.8618(10), Sb1'–Sb2 2.7254(10), C1–O1 1.221(12), O1–Sm–Sb1 76.83(17), Sb1'–Mo1–Sb2 57.37(3), Mo1–Sb1'–Sm1' 152.00(3), Sb1'–Sb2–Mo1 61.59(3), Sb1–Sb2–Mo1 103.46(3), Sb2–Sb1–Sb2' 90.16(3), Sb1–Sb2–Sb1' 89.84(3).

## Theoretical calculations

### Computational Details:

The quantum chemical RI-DFT calculations were performed by means of the program system TURBOMOLE<sup>5</sup> using the RI-BP86 functional.<sup>6</sup> The basis sets for each atom were of def-SV(P) quality.<sup>7</sup> For Mo<sup>8</sup> or Sm<sup>9</sup> effective core potentials (ecp) containing 28 or 51 electrons including the f-electrons were taken. Population analyses based on occupation numbers were performed to calculate shared electron numbers (SEN) as reliable measures for covalent bonding.<sup>10</sup>

**Table S3:** Total energies (given in a.u.) of the molecules under discussion. The energy considerations of Fig. 5 are based on these values.

|                                                                                            | symmetry        | P           | As          | Sb         |
|--------------------------------------------------------------------------------------------|-----------------|-------------|-------------|------------|
| [{CpMo(CO) <sub>2</sub> ] <sub>2</sub> ( $\mu$ , $\eta^{2:2}$ -E <sub>2</sub> )]           | C <sub>2</sub>  | -1659.22071 | -5448.4499  | -987.61943 |
| [(Cp* <sub>2</sub> Sm) <sub>2</sub> E <sub>2</sub> (CpMo(CO) <sub>2</sub> ) <sub>2</sub> ] | C <sub>i</sub>  | -3288.27198 | -7077.4962  | -2616.6594 |
| [(Cp* <sub>2</sub> Sm) <sub>2</sub> E <sub>4</sub> (CpMo(CO) <sub>2</sub> ) <sub>2</sub> ] | C <sub>i</sub>  | -3970.90026 | -11549.3500 | -2627.6896 |
| [(Cp* <sub>2</sub> Sm) <sub>2</sub> E <sub>2</sub> (CpMo(CO) <sub>2</sub> ) <sub>4</sub> ] | C <sub>2</sub>  | -4264.9307  | -8054.1418  | -3593.2969 |
| E <sub>2</sub>                                                                             | D <sub>∞h</sub> | -682.563468 | -4471.7904  | -10.95832  |
| E <sub>2</sub> H <sub>2</sub>                                                              | C <sub>2h</sub> |             |             |            |
| E <sub>2</sub> H <sub>4</sub>                                                              | C <sub>2h</sub> |             |             |            |

**Table S4:** E-E Bond distances (pm) and SEN values obtained from theoretical calculations.

|                                                                                            | P-P           |           | As-As         |          | Sb-Sb         |           |
|--------------------------------------------------------------------------------------------|---------------|-----------|---------------|----------|---------------|-----------|
|                                                                                            | d             | SEN       | d             | SEN      | d             | SEN       |
| [{CpMo(CO) <sub>2</sub> ] <sub>2</sub> ( $\mu$ , $\eta^{2:2}$ -E <sub>2</sub> )]           | 218.45        | 1.23      | 240.94        | 1.06     | 280.18        | 1.05      |
| [(Cp* <sub>2</sub> Sm) <sub>2</sub> E <sub>2</sub> (CpMo(CO) <sub>2</sub> ) <sub>2</sub> ] | 206.51        | 1.57      | 227.9         | 1.38     | 266.32        | 1.38      |
| [(Cp* <sub>2</sub> Sm) <sub>2</sub> E <sub>4</sub> (CpMo(CO) <sub>2</sub> ) <sub>2</sub> ] | 217.79/233.15 | 1.24/0.97 | 240.02/255.73 | 1.1/0.85 | 279.07/293.61 | 1.01/0.85 |
| [(Cp* <sub>2</sub> Sm) <sub>2</sub> E <sub>2</sub> (CpMo(CO) <sub>2</sub> ) <sub>4</sub> ] | 207.75        | 1.38      | 237.07        | 1.03     | 281.1         | 0.87      |
| E <sub>2</sub>                                                                             | 191.6         | 2.46      | 212.25        | 2.28     | 253.72        | 2.21      |
| E <sub>2</sub> H <sub>2</sub>                                                              | 205.48        | 1.73      | 227.08        | 1.59     | 268.8         | 1.56      |
| E <sub>2</sub> H <sub>4</sub>                                                              | 227.66        | 1.08      | 249.41        | 0.99     | 290.05        | 0.97      |

**Cartesian Coordinates of the theoretically calculated Molecules  
(given in a. u.)**

**[ {CpMo (CO)<sub>2</sub> }<sub>2</sub> (μ, η<sup>2:2</sup>-P<sub>2</sub>) ]**

\$coord

|                   |                   |                   |    |
|-------------------|-------------------|-------------------|----|
| -0.30834973622480 | 4.08196070174724  | 0.21989572725268  | mo |
| 0.30834973622480  | -4.08196070174724 | 0.21989572725268  | mo |
| 3.22246887805232  | 5.11469331993020  | 0.99423286581254  | c  |
| -3.22246887805232 | -5.11469331993020 | 0.99423286581254  | c  |
| 0.86406397276028  | 3.07043633515838  | -3.17279808796864 | c  |
| -0.86406397276028 | -3.07043633515838 | -3.17279808796864 | c  |
| 5.24943953927126  | 5.88328400908424  | 1.41251924929999  | o  |
| -5.24943953927126 | -5.88328400908424 | 1.41251924929999  | o  |
| 1.52203364781404  | 2.62877701380224  | -5.23450599479011 | o  |
| -1.52203364781404 | -2.62877701380224 | -5.23450599479011 | o  |
| -3.72588111475749 | 6.09967048683332  | 2.45529805208185  | c  |
| -4.66670155047934 | 5.38504589977637  | 0.01159876146113  | c  |
| -3.23141508213772 | 6.72757500131574  | -1.85491072893377 | c  |
| -1.42355696996306 | 8.29467105979273  | -0.57772957993773 | c  |
| -1.72471979585176 | 7.88532458875162  | 2.10145061390659  | c  |
| -4.42884968837578 | 5.40103053285627  | 4.27889195948667  | h  |
| -6.23096947074277 | 4.07609768699070  | -0.36280548438742 | h  |
| -3.51299109290457 | 6.62203399810001  | -3.90881766237223 | h  |
| -0.09906883857625 | 9.61421559841998  | -1.47657788763415 | h  |
| -0.65601795160886 | 8.83411431593896  | 3.60630246063442  | h  |
| 3.72588111475749  | -6.09967048683332 | 2.45529805208185  | c  |
| 1.72471979585176  | -7.88532458875162 | 2.10145061390659  | c  |
| 4.66670155047934  | -5.38504589977637 | 0.01159876146113  | c  |
| 1.42355696996306  | -8.29467105979273 | -0.57772957993773 | c  |
| 3.23141508213772  | -6.72757500131574 | -1.85491072893377 | c  |
| 4.42884968837578  | -5.40103053285627 | 4.27889195948667  | h  |
| 0.65601795160886  | -8.83411431593896 | 3.60630246063442  | h  |
| 6.23096947074277  | -4.07609768699070 | -0.36280548438742 | h  |
| 0.09906883857625  | -9.61421559841998 | -1.47657788763415 | h  |
| 3.51299109290457  | -6.62203399810001 | -3.90881766237223 | h  |
| 2.06408773875717  | -0.00613498001178 | 1.50795573608825  | p  |
| -2.06408773875717 | 0.00613498001178  | 1.50795573608825  | p  |

\$end

**[ {CpMo (CO)<sub>2</sub> }<sub>2</sub> (μ, η<sup>2:2</sup>-As<sub>2</sub>) ]**

\$coord

|                   |                   |                   |    |
|-------------------|-------------------|-------------------|----|
| -0.37006651411595 | 4.19446113049219  | 0.17685310610832  | mo |
| 0.37006651411595  | -4.19446113049219 | 0.17685310610832  | mo |
| 3.17742963606254  | 5.23663666917989  | 0.81252768663992  | c  |
| -3.17742963606254 | -5.23663666917989 | 0.81252768663992  | c  |
| 0.65543901925306  | 3.17903158706586  | -3.26146053558911 | c  |
| -0.65543901925306 | -3.17903158706586 | -3.26146053558911 | c  |
| 5.20647849516273  | 6.04899382194473  | 1.14731076438739  | o  |
| -5.20647849516273 | -6.04899382194473 | 1.14731076438739  | o  |
| 1.21872500177326  | 2.76897866807403  | -5.35854434585220 | o  |
| -1.21872500177326 | -2.76897866807403 | -5.35854434585220 | o  |
| -3.71797189227186 | 6.20292641853547  | 2.51985205846138  | c  |
| -4.71042870481563 | 5.55832892086894  | 0.07504744089007  | c  |
| -3.28690407393905 | 6.92401467710171  | -1.78480202220594 | c  |
| -1.43607104108615 | 8.43366494707606  | -0.50216565805544 | c  |
| -1.69982560258598 | 7.96971402684038  | 2.17330672669332  | c  |
| -4.40940890290394 | 5.48494117673408  | 4.34045485124214  | h  |



|                   |                   |                   |    |
|-------------------|-------------------|-------------------|----|
| -6.31135729257492 | 4.29532187263999  | -0.30298184948094 | h  |
| -3.60596066437848 | 6.87311103621068  | -3.83516009625259 | h  |
| -0.10820147339750 | 9.75546842058912  | -1.39278954777306 | h  |
| -0.59297002975358 | 8.86977221657889  | 3.68047089214327  | h  |
| 3.71797189227186  | -6.20292641853547 | 2.51985205846138  | c  |
| 1.69982560258598  | -7.96971402684038 | 2.17330672669332  | c  |
| 4.71042870481563  | -5.55832892086894 | 0.07504744089007  | c  |
| 1.43607104108615  | -8.43366494707606 | -0.50216565805544 | c  |
| 3.28690407393905  | -6.92401467710171 | -1.78480202220594 | c  |
| 4.40940890290394  | -5.48494117673408 | 4.34045485124214  | h  |
| 0.59297002975358  | -8.86977221657889 | 3.68047089214327  | h  |
| 6.31135729257492  | -4.29532187263999 | -0.30298184948094 | h  |
| 0.10820147339750  | -9.75546842058912 | -1.39278954777306 | h  |
| 3.60596066437848  | -6.87311103621068 | -3.83516009625259 | h  |
| 2.27608940311289  | 0.04477197673941  | 1.51208052864353  | as |
| -2.27608940311289 | -0.04477197673941 | 1.51208052864353  | as |

\$end

**[ {CpMo (CO)<sub>2</sub> }<sub>2</sub> (μ, η<sup>2:2</sup>-Sb<sub>2</sub>) ]**

\$coord

|                   |                   |                   |    |
|-------------------|-------------------|-------------------|----|
| -0.45345131803413 | 4.42800394865069  | 0.16176160803301  | mo |
| 0.45345131803413  | -4.42800394865069 | 0.16176160803301  | mo |
| 3.09700858432799  | 5.50481188707297  | 0.65393444292648  | c  |
| -3.09700858432799 | -5.50481188707297 | 0.65393444292648  | c  |
| 0.40175703356391  | 3.34495297743235  | -3.30124399999736 | c  |
| -0.40175703356391 | -3.34495297743235 | -3.30124399999736 | c  |
| 5.10552475391943  | 6.41000555388012  | 0.89701406239714  | o  |
| -5.10552475391943 | -6.41000555388012 | 0.89701406239714  | o  |
| 0.84308393076595  | 2.93300288457553  | -5.42917195990210 | o  |
| -0.84308393076595 | -2.93300288457553 | -5.42917195990210 | o  |
| -3.73097152278013 | 6.47104541741548  | 2.57573542923309  | c  |
| -4.77790492383457 | 5.85038197010962  | 0.14413404605557  | c  |
| -3.36443285867382 | 7.19903340870142  | -1.73561343207828 | c  |
| -1.46570113681106 | 8.67139856270526  | -0.48057491280442 | c  |
| -1.69448538569756 | 8.20847393958017  | 2.20003451490318  | c  |
| -4.41452656269867 | 5.77635537136996  | 4.40831583076423  | h  |
| -6.42397062249803 | 4.63953911640639  | -0.20925053602742 | h  |
| -3.72326534033797 | 7.16503390082723  | -3.77959686706325 | h  |
| -0.13526646074734 | 9.97802870009392  | -1.38960836485444 | h  |
| -0.54772448690933 | 9.08727790885893  | 3.68976155943350  | h  |
| 3.73097152278013  | -6.47104541741548 | 2.57573542923309  | c  |
| 1.69448538569756  | -8.20847393958017 | 2.20003451490318  | c  |
| 4.77790492383457  | -5.85038197010962 | 0.14413404605557  | c  |
| 1.46570113681106  | -8.67139856270526 | -0.48057491280442 | c  |
| 3.36443285867382  | -7.19903340870142 | -1.73561343207828 | c  |
| 4.41452656269867  | -5.77635537136996 | 4.40831583076423  | h  |
| 0.54772448690933  | -9.08727790885893 | 3.68976155943350  | h  |
| 6.42397062249803  | -4.63953911640639 | -0.20925053602742 | h  |
| 0.13526646074734  | -9.97802870009392 | -1.38960836485444 | h  |
| 3.72326534033797  | -7.16503390082723 | -3.77959686706325 | h  |
| 2.64415732746676  | 0.12857455279356  | 1.59436857898121  | sb |
| -2.64415732746676 | -0.12857455279356 | 1.59436857898121  | sb |

\$end

**[ (Cp\*<sub>2</sub>Sm)<sub>2</sub>P<sub>2</sub>(CpMo (CO)<sub>2</sub>)<sub>2</sub> ]**

\$coord

|                   |                   |                   |    |
|-------------------|-------------------|-------------------|----|
| -7.67113085999244 | -0.80946155383979 | -0.71715955024543 | sm |
|-------------------|-------------------|-------------------|----|

|                    |                   |                   |    |
|--------------------|-------------------|-------------------|----|
| -4.19944720917236  | 0.68178687293195  | -3.37853701525469 | o  |
| -4.38475387979769  | 0.34690380511289  | 2.35862543939967  | o  |
| -2.34403027854076  | 2.03806822948726  | -3.48961921350678 | c  |
| -9.84623933852756  | 3.71518028850610  | 0.83804168929031  | c  |
| -11.63040899384906 | 1.91484923501928  | -2.75273827783282 | c  |
| -11.56859835070598 | 1.76972179149900  | 1.63718393230009  | c  |
| -9.87383618545662  | 3.79882245986307  | -1.87228015492134 | c  |
| -2.73023394249022  | 1.85594635644285  | 2.90009579079038  | c  |
| -5.27718987710786  | -5.28789841080847 | -1.80145652857965 | c  |
| -12.72208924093034 | 0.70335784620322  | -0.57745863046797 | c  |
| -8.07555356589703  | 4.70108854598549  | 4.42647566003863  | h  |
| -9.65816089591586  | -5.53684014682791 | -2.05247834486509 | c  |
| -2.53160554431455  | -5.23076452041737 | -2.54606720279632 | c  |
| -1.42999209523568  | -3.81299291679851 | -1.45803291246466 | h  |
| -6.24153312054156  | -5.59039848236718 | 0.71629576525730  | c  |
| -4.68272231103578  | -5.95403880117953 | 3.07365376711951  | c  |
| -2.85794568402656  | -4.92555633954667 | 2.97953103637963  | h  |
| -12.30475947020734 | 1.20310550256195  | 4.33421577947391  | c  |
| -7.38805126956673  | -5.21746689447658 | -3.50731884496549 | c  |
| -8.95349801304629  | -5.72855034440282 | 0.56852313552390  | c  |
| -10.05642561246422 | -5.46417636775576 | 4.54655316549091  | h  |
| -10.69405014447210 | 1.43363165162064  | 5.66533740717241  | h  |
| -10.83422471064482 | 1.81217099325665  | -6.81039534787725 | h  |
| 0.36900238993291   | 4.34698552222225  | -4.00079221938703 | mo |
| -8.54091871060639  | 5.55901399433160  | 2.56721392283781  | c  |
| -12.42889945743948 | 1.54507415469061  | -5.46663340308924 | c  |
| -8.55081815598245  | 5.71929526949994  | -3.50851517064921 | c  |
| -0.36909915463495  | 4.34993882192857  | 3.99122854198240  | mo |
| -15.04725277544996 | -0.93864935534958 | -0.56453743256708 | c  |
| -12.21306670626869 | -6.13151253681001 | -3.16213200508734 | c  |
| -1.61503130699490  | -7.10030487638874 | -2.22142675972202 | h  |
| -2.29114084809121  | -4.76324222177416 | -4.57585283745836 | h  |
| -5.67965135583872  | -5.28809697761922 | 4.79940406481573  | h  |
| -4.23400277309253  | -7.99305706408630 | 3.38055805459781  | h  |
| -13.82851664164373 | 2.49856682192501  | 5.00868136993995  | h  |
| -13.03253498973445 | -0.75449115625582 | 4.56364546359586  | h  |
| -7.25038702564870  | -5.11881501383757 | -6.35527329249052 | c  |
| -10.68543535511078 | -6.35164325798928 | 2.74703000828753  | c  |
| -1.94523251558011  | 6.58103833036069  | -0.19385886091674 | p  |
| 1.93902462998208   | 6.58320098462072  | 0.18210005141541  | p  |
| 2.72380885612789   | 1.84717339840892  | -2.90709204499610 | c  |
| 2.23397428433679   | 7.84192858285311  | -6.37535457055061 | c  |
| 3.57523562830843   | 9.15954441945118  | -5.49755943267488 | h  |
| -0.45429292946788  | 8.14950788854219  | -6.47922433884074 | c  |
| -1.52546553888553  | 9.74140262561789  | -5.68786440249075 | h  |
| 0.55363626265862   | 4.36907925475596  | -8.46843736062661 | c  |
| 2.85574539647667   | 5.51182226063320  | -7.60034821033318 | c  |
| 4.76652007938917   | 4.75122332081415  | -7.87651760997873 | h  |
| -1.49338763224645  | 6.01792540366473  | -7.77706205209704 | c  |
| -3.50117281275674  | 5.71338340707948  | -8.20506144540514 | h  |
| -6.74856465574450  | 6.29039943661477  | 1.75547467901046  | h  |
| -9.78095686505626  | 7.22241397236491  | 2.95420455393082  | h  |
| -13.22000995277523 | -0.37049898618965 | -5.80916410580315 | h  |
| -13.92049441991042 | 2.92773362904707  | -6.02896617513157 | h  |
| -8.11261020065162  | 4.96238383267736  | -5.41907999735915 | h  |
| -9.75860343581808  | 7.42630413649490  | -3.79233839720634 | h  |
| -6.74114316070773  | 6.37393280876070  | -2.66679576144219 | h  |
| 2.33226759269852   | 2.02761921897602  | 3.47964925762125  | c  |
| -2.24193624642725  | 7.83681124405380  | 6.37131442035601  | c  |

|                    |                   |                   |    |
|--------------------|-------------------|-------------------|----|
| -3.59739044783876  | 9.14402211825956  | 5.49977678910490  | h  |
| 0.44490074593350   | 8.16191972436651  | 6.45761190634731  | c  |
| 1.50055776437280   | 9.75932251202387  | 5.65654688855538  | h  |
| -0.52579719173729  | 4.37898571182580  | 8.46006848437043  | c  |
| -2.84052925183941  | 5.50462380429514  | 7.60408691823971  | c  |
| -4.74447594263864  | 4.73157474906545  | 7.89306100370077  | h  |
| 1.50618313240698   | 6.04015543873058  | 7.75341865306733  | c  |
| 3.51850240082617   | 5.75003325095596  | 8.16978813509583  | h  |
| -14.98650186472003 | -2.43936693059940 | 0.90511664310544  | h  |
| -16.75628503530888 | 0.22941513705398  | -0.15573941764562 | h  |
| -15.37937996584412 | -1.87187653073507 | -2.41003024075793 | h  |
| -12.73054771553159 | -4.86856842118415 | -4.76091129777234 | h  |
| -12.23793695463686 | -8.09931596008673 | -3.92218979897071 | h  |
| -13.74761304164933 | -6.01035710382074 | -1.74176864457475 | h  |
| -9.00909692711264  | -4.33963041464882 | -7.20044466537061 | h  |
| -5.65273157895050  | -3.93653468310472 | -7.03711058514528 | h  |
| -6.98402481726670  | -7.04150285420247 | -7.18327502651049 | h  |
| -12.65953535867090 | -5.72645079878570 | 2.40045645857099  | h  |
| -10.75837212800036 | -8.43034158812904 | 3.10162569046552  | h  |
| 7.66103062598247   | -0.82621131126499 | 0.71486812490791  | sm |
| 4.37574668931679   | 0.33553424809524  | -2.36506240536298 | o  |
| 0.39548862291986   | 2.60756089227727  | -9.55217922302365 | h  |
| 4.17881149577491   | 0.65944737753360  | 3.36795834035260  | o  |
| -0.34935503445731  | 2.62043499063152  | 9.54576825920378  | h  |
| 9.83404984138555   | 3.70346888238331  | -0.83100699635892 | c  |
| 11.60950124420456  | 1.90450618111117  | 2.76472820011385  | c  |
| 11.56223234339487  | 1.76111793252180  | -1.62529004590969 | c  |
| 9.85260335683286   | 3.78587396391389  | 1.87930388883381  | c  |
| 5.28514694225126   | -5.31794986730601 | 1.78857617371774  | c  |
| 12.71085993328802  | 0.69638279925380  | 0.59255913868706  | c  |
| 8.07686960825908   | 4.68959133923817  | -4.42562379094918 | h  |
| 9.66619571865833   | -5.54738539113189 | 2.05532873404429  | c  |
| 2.53898834918278   | -5.28712236718645 | 2.52804746445484  | c  |
| 1.39679332984016   | -4.01625424979968 | 1.31064888719814  | h  |
| 6.25974422138325   | -5.61366225031452 | -0.72614249948839 | c  |
| 4.71408535321068   | -5.98324593045388 | -3.09128706587488 | c  |
| 2.88154781664118   | -4.96800279170740 | -3.00393038372039 | h  |
| 12.30933662601203  | 1.19756897138425  | -4.31995140986669 | c  |
| 7.38963978621390   | -5.23944465591375 | 3.50193687785797  | c  |
| 8.97209559311206   | -5.73888994032242 | -0.56843252646079 | c  |
| 10.09205761769739  | -5.46062808718058 | -4.54111933310643 | h  |
| 10.70361426045305  | 1.42783958134758  | -5.65711135293939 | h  |
| 10.80099513204133  | 1.79866980844467  | 6.81985523255070  | h  |
| 8.53341447470485   | 5.54686124575055  | -2.56393299926090 | c  |
| 12.40052720321835  | 1.53624383986970  | 5.48099098034973  | c  |
| 8.52361232581742   | 5.70476658694768  | 3.51233771561098  | c  |
| 15.04172664977734  | -0.93749939589688 | 0.58608552370308  | c  |
| 12.21891580325081  | -6.13224136930930 | 3.17501033020010  | c  |
| 1.68607201323480   | -7.20918061237603 | 2.37630926583023  | h  |
| 2.27354445705637   | -4.64448740699499 | 4.50638622623947  | h  |
| 5.71422673135175   | -5.30647789894586 | -4.81097464171052 | h  |
| 4.28104742655737   | -8.02457546933797 | -3.40491290845191 | h  |
| 13.83446961806021  | 2.49507414867379  | -4.98735009025426 | h  |
| 13.03985380785974  | -0.75912739769296 | -4.54826004699686 | h  |
| 7.23920212869817   | -5.14693226274200 | 6.34915629083726  | c  |
| 10.71445027225508  | -6.35235275735060 | -2.74141892386609 | c  |
| 6.73703407517522   | 6.27582102269319  | -1.75912464934565 | h  |
| 9.77316429774372   | 7.21188323529655  | -2.94476494990627 | h  |
| 13.19571420646202  | -0.37723486261889 | 5.82560998098257  | h  |

|                   |                   |                   |   |
|-------------------|-------------------|-------------------|---|
| 13.88662202071938 | 2.92281481798170  | 6.04817970309768  | h |
| 8.08148746471601  | 4.94702743186312  | 5.42165276768907  | h |
| 9.72933262228424  | 7.41268898526871  | 3.79947979813189  | h |
| 6.71552091427262  | 6.35817593483019  | 2.66636949011545  | h |
| 14.98971841315059 | -2.43992915686551 | -0.88205867864648 | h |
| 16.74707820352734 | 0.23666818520361  | 0.17949735380108  | h |
| 15.37365351202298 | -1.86727974511568 | 2.43328893995686  | h |
| 12.72714829817765 | -4.86493870420881 | 4.77327980704864  | h |
| 12.24622503822068 | -8.09847599762803 | 3.93900451929722  | h |
| 13.75815653116652 | -6.00972781384585 | 1.75998086479728  | h |
| 8.98678736747743  | -4.35349069704234 | 7.20417568562813  | h |
| 5.62705083120546  | -3.98104311278902 | 7.02542144627622  | h |
| 6.98577755357907  | -7.07337783167514 | 7.17263821548219  | h |
| 12.68596860440589 | -5.72498594994042 | -2.38433719497031 | h |
| 10.79238293505039 | -8.42985437299640 | -3.10185705094920 | h |

Send

**[ (Cp\*<sub>2</sub>Sm)<sub>2</sub>As<sub>2</sub> (CpMo (CO)<sub>2</sub>)<sub>2</sub> ]**

| Scoord             |                   |                   |    |
|--------------------|-------------------|-------------------|----|
| -7.67822831763027  | -0.77361739080089 | -0.71201103009942 | sm |
| -4.25499598821472  | 0.82834179105763  | -3.37589528473779 | o  |
| -4.37975886618336  | 0.41540003722498  | 2.35407794743414  | o  |
| -2.37543727111019  | 2.15094571457145  | -3.50356558485119 | c  |
| -9.98642810064453  | 3.65143714878697  | 0.94380988049128  | c  |
| -11.73752288336594 | 1.86992578288272  | -2.67225982370261 | c  |
| -11.64444495837250 | 1.63832309527893  | 1.71266249834913  | c  |
| -10.03496056278244 | 3.78971129749312  | -1.76428239843330 | c  |
| -2.72660096014314  | 1.91884303080245  | 2.92157842915490  | c  |
| -5.19919967079436  | -5.18319829810707 | -1.86444506805206 | c  |
| -12.78084201710067 | 0.58455927282873  | -0.51650404118690 | c  |
| -8.24816898654297  | 4.61428861374519  | 4.55340016812628  | h  |
| -9.57115601928058  | -5.51190974063852 | -2.17113563163011 | c  |
| -2.44872598957480  | -5.06575819180736 | -2.57778166302014 | c  |
| -1.37387761980691  | -3.68187285599875 | -1.42271169007007 | h  |
| -6.18563173626906  | -5.55519697184082 | 0.63553464104161  | c  |
| -4.64850251786375  | -5.93229060090807 | 3.00466016073194  | c  |
| -2.88185773337087  | -4.80344062065570 | 2.98944981754636  | h  |
| -12.34815271559500 | 0.99790065145475  | 4.40204479323391  | c  |
| -7.29172259552599  | -5.11797774593664 | -3.59240645319532 | c  |
| -8.89257515198571  | -5.74428782029447 | 0.45325266287252  | c  |
| -10.06451088257527 | -5.57129817317156 | 4.41806001281046  | h  |
| -10.72994015697025 | 1.22051975237994  | 5.72562387615678  | h  |
| -10.96116265720113 | 1.86160743857215  | -6.73554304171668 | h  |
| 0.37882236815394   | 4.40238115983719  | -4.07409384211061 | mo |
| -8.73125442472717  | 5.49522858367288  | 2.70956565687328  | c  |
| -12.54277439115447 | 1.53699216830925  | -5.38887315216246 | c  |
| -8.79964946637421  | 5.78602805336683  | -3.37729302695430 | c  |
| -0.37816500126365  | 4.40193739980046  | 4.07425112519274  | mo |
| -15.06356636356976 | -1.11597350985973 | -0.52586063744219 | c  |
| -12.09910882097026 | -6.13553966742641 | -3.32594538180561 | c  |
| -1.51496370391856  | -6.93671694634429 | -2.31640022310036 | h  |
| -2.19209323032754  | -4.51672990049403 | -4.58492353734919 | h  |
| -5.71329771933565  | -5.39622248602720 | 4.73501701514822  | h  |
| -4.09285137968666  | -7.95464529157679 | 3.23696090362443  | h  |
| -13.88513893434898 | 2.25387529376759  | 5.11985204971829  | h  |
| -13.04439166056797 | -0.97520237259460 | 4.59008050323020  | h  |
| -7.12403863210642  | -4.95881557190875 | -6.43581071508449 | c  |
| -10.63299331996579 | -6.45645758794221 | 2.59726579067891  | c  |

|                    |                   |                   |    |
|--------------------|-------------------|-------------------|----|
| -2.14323683014585  | 6.78490752537472  | -0.20519570296646 | as |
| 2.14388012095660   | 6.78586634326089  | 0.20549364304009  | as |
| 2.72639825587271   | 1.91846578637093  | -2.92180780405794 | c  |
| 2.23756352725977   | 7.84419941759530  | -6.52152122674210 | c  |
| 3.56755120834220   | 9.19873843486869  | -5.68268532291318 | h  |
| -0.45110781179057  | 8.13366748125915  | -6.65040362344199 | c  |
| -1.53471639610403  | 9.74544382379033  | -5.91862640973567 | h  |
| 0.59004577893740   | 4.30245359913792  | -8.52699074960405 | c  |
| 2.88045675363842   | 5.48288450465094  | -7.67677437192815 | c  |
| 4.79794466925818   | 4.72844227915747  | -7.92204302768117 | h  |
| -1.47015141248598  | 5.95781211197879  | -7.89245826044055 | c  |
| -3.47338706575094  | 5.63108929331942  | -8.32578782341186 | h  |
| -6.95468549966842  | 6.28469846345412  | 1.91724042518745  | h  |
| -10.01061248320237 | 7.12142318838779  | 3.12445931320704  | h  |
| -13.29752905445736 | -0.38671091420303 | -5.76462614658654 | h  |
| -14.06412656808184 | 2.90082165175681  | -5.91683466612853 | h  |
| -8.30755276670581  | 5.06851205253899  | -5.28957874827929 | h  |
| -10.08967501455162 | 7.43227648744013  | -3.65755281316791 | h  |
| -7.03106193920579  | 6.52332946511143  | -2.51759898954506 | h  |
| 2.37559817281601   | 2.14976497188979  | 3.50417804915564  | c  |
| -2.23877644393080  | 7.84383243519542  | 6.51968938351218  | c  |
| -3.56857181545260  | 9.19790838529175  | 5.67988553315229  | h  |
| 0.44977343062245   | 8.13394794431504  | 6.65004922155013  | c  |
| 1.53352142993949   | 9.74573433883998  | 5.91833175854933  | h  |
| -0.59151286512487  | 4.30305854605847  | 8.52711718030619  | c  |
| -2.88174062489848  | 5.48272505695199  | 7.67534315650753  | c  |
| -4.79907650312398  | 4.72782013658367  | 7.91992057352187  | h  |
| 1.46867287226136   | 5.95867568889339  | 7.89327551487483  | c  |
| 3.47189799959648   | 5.63268387141185  | 8.32758853258836  | h  |
| -14.95755677192454 | -2.64586550873887 | 0.91035903677228  | h  |
| -16.79831712996737 | 0.00072798553774  | -0.08282898109671 | h  |
| -15.38358845121998 | -2.01653384738305 | -2.38945331619921 | h  |
| -12.63437328261569 | -4.83618793155626 | -4.88934887190245 | h  |
| -12.06545021850398 | -8.07806314945327 | -4.14802994316774 | h  |
| -13.64970211276940 | -6.10016408408273 | -1.91822625624178 | h  |
| -8.88783978450956  | -4.19618837212028 | -7.28539110058552 | h  |
| -5.54196723379510  | -3.73264573565542 | -7.07457157341066 | h  |
| -6.81129226992142  | -6.85896666371078 | -7.29872632676297 | h  |
| -12.62197247493848 | -5.89705549551601 | 2.22777547720655  | h  |
| -10.63639304475595 | -8.54096050628219 | 2.92368452517065  | h  |
| 7.67854936701042   | -0.77314003248441 | 0.71221777039072  | sm |
| 4.37985160274630   | 0.41440541091060  | -2.35464613134040 | o  |
| 0.44913805704790   | 2.51241245806841  | -9.56521731077978 | h  |
| 4.25568206782340   | 0.82719920901458  | 3.37694166015518  | o  |
| -0.45062632687623  | 2.51325372383212  | 9.56591996418513  | h  |
| 9.98742274362851   | 3.65164183640591  | -0.94364970013324 | c  |
| 11.73823103536210  | 1.86955577122133  | 2.67233505616435  | c  |
| 11.64509148787167  | 1.63827943952740  | -1.71262560399226 | c  |
| 10.03604986660450  | 3.78976185637886  | 1.76449962224057  | c  |
| 5.19910914930123   | -5.18235080462211 | 1.86453557965827  | c  |
| 12.78122893071782  | 0.58410634607523  | 0.51646870218496  | c  |
| 8.24877924429551   | 4.61474894886477  | -4.55309530633702 | h  |
| 9.57103695881336   | -5.51158383706374 | 2.17117695489194  | c  |
| 2.44857205046702   | -5.06462091817834 | 2.57784521893478  | c  |
| 1.37424154579505   | -3.67991206920059 | 1.42319705461175  | h  |
| 6.18549530079661   | -5.55432735425855 | -0.63547954025934 | c  |
| 4.64825922991027   | -5.93108069486738 | -3.00467085085014 | c  |
| 2.88185528461053   | -4.80178411848487 | -2.98932718588224 | h  |
| 12.34854432787931  | 0.99791874554942  | -4.40215334071144 | c  |

|                   |                   |                   |   |
|-------------------|-------------------|-------------------|---|
| 7.29165495962623  | -5.11746440014341 | 3.59248611959287  | c |
| 8.89241139199583  | -5.74374988617693 | -0.45321381598545 | c |
| 10.06428004994744 | -5.57058163113816 | -4.41804518427878 | h |
| 10.73013505613732 | 1.22093484744174  | -5.72556824616403 | h |
| 10.96166847550311 | 1.86123550450688  | 6.73559438349864  | h |
| 8.73207599223265  | 5.49569061823058  | -2.70923088341714 | c |
| 12.54337226503293 | 1.53632502653278  | 5.38901728039764  | c |
| 8.80074945973060  | 5.78613424162929  | 3.37772952203223  | c |
| 15.06386915820650 | -1.11664054827009 | 0.52567053184839  | c |
| 12.09892211540430 | -6.13567713077602 | 3.32600030331293  | c |
| 1.51450125226742  | -6.93529111172543 | 2.31573870769674  | h |
| 2.19207778949835  | -4.51609469915438 | 4.58516973005322  | h |
| 5.71316792501932  | -5.39495549358556 | -4.73498568976264 | h |
| 4.09227647325976  | -7.95331698400819 | -3.23710537413223 | h |
| 13.88568504728185 | 2.25373517447690  | -5.11996014756318 | h |
| 13.04440119785253 | -0.97532712124085 | -4.59040001019631 | h |
| 7.12393856322044  | -4.95822248571318 | 6.43595124690767  | c |
| 10.63274789142469 | -6.45598582257345 | -2.59732786733398 | c |
| 6.95536085513912  | 6.28477490079714  | -1.91657544109864 | h |
| 10.01134064502020 | 7.12200595938569  | -3.12397729138930 | h |
| 13.29764170547698 | -0.38760342879696 | 5.76473390059276  | h |
| 14.06499847712470 | 2.89984097404713  | 5.91707320863735  | h |
| 8.30835745075866  | 5.06827218220857  | 5.28989494880605  | h |
| 10.09083306776776 | 7.43233141402149  | 3.65816908020049  | h |
| 7.03207440401308  | 6.52342720458751  | 2.51792529888278  | h |
| 14.95770106402964 | -2.64644822316768 | -0.91065459280579 | h |
| 16.79865625811535 | 0.00003152991763  | 0.08264438253573  | h |
| 15.38388221726235 | -2.01733754464290 | 2.38921935923808  | h |
| 12.63436055661373 | -4.83639637357572 | 4.88943633609325  | h |
| 12.06488858043229 | -8.07821465246060 | 4.14805437348612  | h |
| 13.64953925183266 | -6.10052367670712 | 1.91827787158938  | h |
| 8.88789670862420  | -4.19585880522469 | 7.28553472923850  | h |
| 5.54209402780932  | -3.73158947205333 | 7.07454062366235  | h |
| 6.81075858432903  | -6.85837568507001 | 7.29892628882088  | h |
| 12.62179246020345 | -5.89676334152338 | -2.22783407658114 | h |
| 10.63591538716890 | -8.54046857996392 | -2.92391719356334 | h |

Send

**[ (Cp\*<sub>2</sub>Sm)<sub>2</sub>Sb<sub>2</sub> (CpMo (CO)<sub>2</sub>)<sub>2</sub> ]**

Scoord

|                    |                   |                   |    |
|--------------------|-------------------|-------------------|----|
| -7.69897106839056  | -0.67584863990343 | -0.73007612526701 | sm |
| -4.33680606186380  | 1.10126643028995  | -3.37876477155564 | o  |
| -4.38514752497266  | 0.56939904695288  | 2.32707283591345  | o  |
| -2.42262503026516  | 2.37519618485328  | -3.53573105618317 | c  |
| -10.24321573735476 | 3.56173934691955  | 1.09612440075850  | c  |
| -11.96871872239513 | 1.76459878618704  | -2.52437172952309 | c  |
| -11.75074268734446 | 1.42517297618339  | 1.84660903871544  | c  |
| -10.37054450255754 | 3.76804748595766  | -1.60497655590355 | c  |
| -2.73864554808057  | 2.06410536810430  | 2.94446530496133  | c  |
| -5.05903682443352  | -4.94579273775069 | -1.99679399554579 | c  |
| -12.88106416145273 | 0.36521026849119  | -0.38151080020017 | c  |
| -8.30873594075096  | 4.49594341688918  | 4.61794558518966  | h  |
| -9.40922112680644  | -5.42835724311758 | -2.40043400467800 | c  |
| -2.30337545869034  | -4.71174103149723 | -2.65233077490385 | c  |
| -1.30697418260378  | -3.28367910735436 | -1.48073472302696 | h  |
| -6.07660412671894  | -5.44643454703276 | 0.46814761595488  | c  |
| -4.57579824615010  | -5.84900560476723 | 2.85616173365410  | c  |
| -2.94450503284599  | -4.53966148121108 | 3.00139251265292  | h  |

|                    |                   |                   |    |
|--------------------|-------------------|-------------------|----|
| -12.34584288726320 | 0.68288833745697  | 4.53618349352951  | c  |
| -7.12096218794378  | -4.89251320105782 | -3.76073614592510 | c  |
| -8.76969960934912  | -5.73714782474666 | 0.22501576880665  | c  |
| -10.08646739125253 | -5.72112193643169 | 4.15328585592833  | h  |
| -10.69552770074437 | 0.92537232744096  | 5.81641474955233  | h  |
| -11.29292038095772 | 1.89391773664998  | -6.60428395479753 | h  |
| 0.40874911248899   | 4.50709647776242  | -4.23533034657897 | mo |
| -9.08776938576627  | 5.42901831193066  | 2.90481631804264  | c  |
| -12.82685684593698 | 1.47192901379507  | -5.22934340019177 | c  |
| -9.34377919905469  | 5.88215628114137  | -3.21388946429885 | c  |
| -0.40901507981643  | 4.50709841603318  | 4.23561259816815  | mo |
| -15.06725422816836 | -1.45748549331346 | -0.38589598418656 | c  |
| -11.88578948216147 | -6.10467202815212 | -3.63486927942362 | c  |
| -1.30370325516910  | -6.54361350155562 | -2.36655324649775 | h  |
| -2.02823543403665  | -4.15598297807936 | -4.65498754920721 | h  |
| -5.74961045583167  | -5.57649565611865 | 4.57690518641562  | h  |
| -3.80606191448863  | -7.81100971777148 | 2.95041920289926  | h  |
| -13.90162392259135 | 1.86262771870836  | 5.33818435114444  | h  |
| -12.96712599490534 | -1.31805190110667 | 4.68523225792675  | h  |
| -6.91091858613856  | -4.61714749689320 | -6.59212816791128 | c  |
| -10.50696513623711 | -6.62911417273325 | 2.30336657937225  | c  |
| -2.50599897340993  | 7.16098314403511  | -0.23172070725410 | sb |
| 2.50528963883180   | 7.16100518688539  | 0.23210574217833  | sb |
| 2.73773419799279   | 2.06378851826116  | -2.94431682748135 | c  |
| 2.27704888962847   | 7.80320330010261  | -6.85489297833822 | c  |
| 3.58855152391316   | 9.22784138789376  | -6.10763799640484 | h  |
| -0.41136143232272  | 8.06384267670149  | -7.03853800781426 | c  |
| -1.51431486399543  | 9.71866512075679  | -6.44560055425879 | h  |
| 0.68169164228559   | 4.12422070280336  | -8.65184163467626 | c  |
| 2.95262327987522   | 5.37678339306946  | -7.84856290142752 | c  |
| 4.87950570647019   | 4.62697896312877  | -8.02519668741315 | h  |
| -1.39759499317779  | 5.80154052895481  | -8.15093043503240 | c  |
| -3.39172193392998  | 5.43291362067180  | -8.59265869519515 | h  |
| -7.51970946672418  | 6.52002736757029  | 2.03537407317089  | h  |
| -10.53018483701748 | 6.82002709472097  | 3.56591442824509  | h  |
| -13.51708159676729 | -0.46824959527006 | -5.63986244090941 | h  |
| -14.41145745917954 | 2.79002842617592  | -5.68326945176370 | h  |
| -8.71258764302290  | 5.21350527169051  | -5.10355688929176 | h  |
| -10.81716814553331 | 7.35419184333579  | -3.55093263883027 | h  |
| -7.70120124319480  | 6.83743712756571  | -2.32087582342117 | h  |
| 2.42219947643000   | 2.37462337718699  | 3.53614295165674  | c  |
| -2.27683182692453  | 7.80350271805696  | 6.85534822721257  | c  |
| -3.58780838013389  | 9.22863081725393  | 6.10814118027968  | h  |
| 0.41163169226733   | 8.06335838677260  | 7.03930210848125  | c  |
| 1.51527056352900   | 9.71798067316691  | 6.44665535941936  | h  |
| -0.68283638103330  | 4.12381019370164  | 8.65201557794852  | c  |
| -2.95325946071266  | 5.37717511248532  | 7.84861890189004  | c  |
| -4.88036125116820  | 4.62801546221240  | 8.02504332337593  | h  |
| 1.39703263693705   | 5.80057507439317  | 8.15158089940235  | c  |
| 3.39118052983272   | 5.43116026958257  | 8.59342585331992  | h  |
| -14.84477830639881 | -3.01624164663195 | 1.00361976219358  | h  |
| -16.84747625500437 | -0.44756442780197 | 0.12778834384985  | h  |
| -15.38445223778249 | -2.32195699084498 | -2.26684081842123 | h  |
| -12.47222500053156 | -4.73366004300470 | -5.11677388571674 | h  |
| -11.73813447179156 | -7.98275131415653 | -4.58460984402184 | h  |
| -13.45201385621630 | -6.24821494854652 | -2.25152878449239 | h  |
| -8.68517638090909  | -3.88017540453715 | -7.44295908313062 | h  |
| -5.36075297446780  | -3.31547514149535 | -7.15345986604463 | h  |
| -6.52129528586861  | -6.47155889538056 | -7.52093434889963 | h  |

|                    |                   |                   |    |
|--------------------|-------------------|-------------------|----|
| -12.52368419249052 | -6.24801458403614 | 1.87052178293850  | h  |
| -10.32951775658888 | -8.70945434125438 | 2.60608563680054  | h  |
| 7.69913329336100   | -0.67616096812497 | 0.73033000123397  | sm |
| 4.38487911450852   | 0.56905468007574  | -2.32664970573287 | o  |
| 0.56856492507641   | 2.27356556908179  | -9.58187402364820 | h  |
| 4.33689537734198   | 1.10080231179679  | 3.37942284998791  | o  |
| -0.57028507902736  | 2.27295816912961  | 9.58192351184858  | h  |
| 10.24270834702934  | 3.56152901527869  | -1.09662337883800 | c  |
| 11.96895840120882  | 1.76460687780351  | 2.52365804120052  | c  |
| 11.75016135019351  | 1.42492600402160  | -1.84725922227697 | c  |
| 10.37053371365969  | 3.76796573209734  | 1.60449280468994  | c  |
| 5.05951316828909   | -4.94600903948166 | 1.99761959997956  | c  |
| 12.88091471371970  | 0.36511907439385  | 0.38070205087887  | c  |
| 8.30750478796233   | 4.49586761902833  | -4.61819606117125 | h  |
| 9.40980611080494   | -5.42849343861540 | 2.40047353608640  | c  |
| 2.30386090975030   | -4.71182993471847 | 2.65358033837285  | c  |
| 1.30779577494831   | -3.28249168658213 | 1.48315202150184  | h  |
| 6.07667516055566   | -5.44662865235882 | -0.46751305389279 | c  |
| 4.57549191744203   | -5.84890921150133 | -2.85540716302401 | c  |
| 2.94434334262174   | -4.53927972761104 | -3.00029957176669 | h  |
| 12.34468557384855  | 0.68252562814491  | -4.53699173116299 | c  |
| 7.12177384748371   | -4.89271375379633 | 3.76117886939491  | c  |
| 8.76981285570076   | -5.73734186088963 | -0.22485355184782 | c  |
| 10.08581531704051  | -5.72123155430487 | -4.15342390141328 | h  |
| 10.69398110129425  | 0.92499446834000  | -5.81681241884516 | h  |
| 11.29370773318389  | 1.89423104804573  | 6.60370387845156  | h  |
| 9.08712613395445   | 5.42898980493948  | -2.90524703420843 | c  |
| 12.82755359224616  | 1.47211448948301  | 5.22857988296652  | c  |
| 9.34401195222687   | 5.88226294831259  | 3.21359772314238  | c  |
| 15.06725724202942  | -1.45746857465586 | 0.38479477681492  | c  |
| 11.88660644688703  | -6.10481152747575 | 3.63453284789046  | c  |
| 1.30375638937228   | -6.54324417816852 | 2.36644179085350  | h  |
| 2.02909340087172   | -4.15747240870345 | 4.65673484446363  | h  |
| 5.74915653964193   | -5.57631226071697 | -4.57629170478945 | h  |
| 3.80554459863796   | -7.81083620014950 | -2.94972731532848 | h  |
| 13.90032589288436  | 1.86225655591847  | -5.33936705020598 | h  |
| 12.96590253974183  | -1.31847395802751 | -4.68611834117524 | h  |
| 6.91222684934244   | -4.61719229555687 | 6.59266786393939  | c  |
| 10.50671085788103  | -6.62928304319791 | -2.30357540280482 | c  |
| 7.51930874481729   | 6.52021008036991  | -2.03535797909677 | h  |
| 10.52969846565782  | 6.81976699552990  | -3.56664227658706 | h  |
| 13.51779276914000  | -0.46809954412871 | 5.63915101230992  | h  |
| 14.41226327995600  | 2.79026703464849  | 5.68214796254858  | h  |
| 8.71322646296556   | 5.21353730936845  | 5.10351802537003  | h  |
| 10.81747937407932  | 7.35441287909073  | 3.55018236575899  | h  |
| 7.70101209475190   | 6.83734834544332  | 2.32080757623428  | h  |
| 14.84462186588559  | -3.01630303725589 | -1.00465695423515 | h  |
| 16.84734396636424  | -0.44742101133252 | -0.12923011979465 | h  |
| 15.38481234678876  | -2.32184321390478 | 2.26576350326590  | h  |
| 12.47324198153071  | -4.73374589354223 | 5.11636967708585  | h  |
| 11.73910641409598  | -7.98290885910682 | 4.58430209233882  | h  |
| 13.45263230808724  | -6.24831604173023 | 2.25091892606847  | h  |
| 8.68667062585904   | -3.88010221331881 | 7.44314138303545  | h  |
| 5.36208938831488   | -3.31542515599341 | 7.15416845794803  | h  |
| 6.52278397114760   | -6.47158953027911 | 7.52164315438673  | h  |
| 12.52353501137584  | -6.24814107552923 | -1.87110638145010 | h  |
| 10.32921551277306  | -8.70963884691168 | -2.60627319265705 | h  |

Send



[ (Cp\*<sub>2</sub>Sm)<sub>2</sub>P<sub>4</sub>(CpMo(CO)<sub>2</sub>)<sub>2</sub> ]

\$coord

|                   |                    |                   |    |
|-------------------|--------------------|-------------------|----|
| -1.78318930514332 | -3.30200957414324  | 7.16763886349667  | sm |
| 0.83938174338763  | -1.81153844775478  | 2.21085332064709  | p  |
| -4.07709212774888 | 0.45731218354638   | 5.74759536805681  | o  |
| -3.95010901976866 | 1.75315603956886   | 3.85598093479960  | c  |
| -0.40795397338395 | -2.18453943025486  | 12.07873698785783 | c  |
| 0.07770128321246  | 0.09986174230099   | 10.69051279011860 | c  |
| 2.17575650589761  | -0.34400293845232  | 9.03135901435163  | c  |
| 2.96862495906891  | -2.92337806925662  | 9.35890419440760  | c  |
| 1.39450970367666  | -4.05754161134582  | 11.26034567740833 | c  |
| -2.17265642986943 | -2.37553255196255  | 14.31020805081359 | c  |
| -4.06896667688130 | -1.54658916540217  | 13.92783047454714 | h  |
| -5.01166817180806 | -7.02416867477306  | 9.04747113422561  | c  |
| -6.60112232592085 | -5.24101975043352  | 7.74965263201640  | c  |
| -6.09346984423898 | -5.44102773515431  | 5.09040867286935  | c  |
| -4.16669815937705 | -7.31732441659832  | 4.74387445190720  | c  |
| -3.47367795887806 | -8.28311311288499  | 7.19037144678284  | c  |
| -6.30151262952021 | -3.78758117624112  | 1.31866403056142  | h  |
| -3.35980923432758 | -8.37410012918407  | 2.22500965481500  | c  |
| -1.61343921050214 | -9.52597021245538  | 2.37979837258176  | h  |
| -0.10076073139300 | -10.56145718230255 | 6.39996945398965  | h  |
| 0.91585050987271  | 2.52623233084345   | 1.44244978336300  | p  |
| -0.91585050987271 | -2.52623233084345  | -1.44244978336300 | p  |
| 3.74022089304202  | -3.94719297475086  | -1.03630980118932 | mo |
| -3.74022089304202 | 3.94719297475086   | 1.03630980118932  | mo |
| -1.20205527705110 | 2.60676913646137   | 11.13108939159972 | c  |
| 3.54037090653826  | 1.65408925850197   | 7.53178116228782  | c  |
| 5.24884940984899  | -4.13737352952838  | 8.15038245633127  | c  |
| 1.89023170756321  | -6.58040263120611  | 12.48852125013313 | c  |
| -1.39286980806141 | -1.33462027378946  | 15.97121255222883 | h  |
| -2.46724935394189 | -4.35912978906613  | 14.91622286173705 | h  |
| -5.32944873433165 | -7.81797217415682  | 11.76385801668370 | c  |
| -8.63777003844294 | -3.63944411794481  | 8.93982046783552  | c  |
| -7.51305364711749 | -4.14418642540478  | 2.99424076809535  | c  |
| -1.77773474027829 | -10.52665089473395 | 7.66982352044432  | c  |
| -3.02251941421462 | -6.87407994909831  | 0.78811952497691  | h  |
| -4.85304170093745 | -9.64294039780382  | 1.44062560932387  | h  |
| -0.83938174338763 | 1.81153844775478   | -2.21085332064709 | p  |
| 3.95010901976866  | -1.75315603956886  | -3.85598093479960 | c  |
| 6.11644642827739  | -1.64210494389267  | 0.64981374771606  | c  |
| 2.44706387876696  | -8.30585347566677  | -1.64457052819649 | c  |
| 0.47707041690388  | -8.83783735250669  | -2.01281512364543 | h  |
| 3.64161071621466  | -8.20056137347696  | 0.78270319358570  | c  |
| 2.74719105875373  | -8.63012773877591  | 2.60471756982906  | h  |
| 6.21268573044872  | -7.45054244117200  | 0.42082639919161  | c  |
| 7.63766326814662  | -7.22602129578714  | 1.91304621352235  | h  |
| 6.62606787976016  | -7.09471170839160  | -2.23976376905471 | c  |
| 4.28506536004158  | -7.62991923430946  | -3.51417063432596 | c  |
| 3.97931959805432  | -7.59447061429995  | -5.56608942177062 | h  |
| -6.11644642827739 | 1.64210494389267   | -0.64981374771606 | c  |
| -2.44706387876696 | 8.30585347566677   | 1.64457052819649  | c  |
| -0.47707041690388 | 8.83783735250669   | 2.01281512364543  | h  |
| -3.64161071621466 | 8.20056137347696   | -0.78270319358570 | c  |
| -2.74719105875373 | 8.63012773877591   | -2.60471756982906 | h  |
| -6.21268573044872 | 7.45054244117200   | -0.42082639919161 | c  |
| -7.63766326814662 | 7.22602129578714   | -1.91304621352235 | h  |
| -6.62606787976016 | 7.09471170839160   | 2.23976376905471  | c  |

|                    |                    |                    |    |
|--------------------|--------------------|--------------------|----|
| -4.28506536004158  | 7.62991923430946   | 3.51417063432596   | c  |
| -3.97931959805432  | 7.59447061429995   | 5.56608942177062   | h  |
| -0.28002543342829  | 3.66768437535914   | 12.70512977521019  | h  |
| -3.22667841315263  | 2.39036180108854   | 11.64985572369383  | h  |
| -1.11961022520536  | 3.83644784384298   | 9.43193776351306   | h  |
| 4.71739952880760   | 0.84819085104369   | 5.99370783716648   | h  |
| 4.83664334253267   | 2.75857708730358   | 8.77737499803404   | h  |
| 2.23256236147107   | 3.03991339732728   | 6.64472157963781   | h  |
| 5.03583437681593   | -6.22118700295160  | 7.97200441008728   | h  |
| 6.98907456220912   | -3.80890437628144  | 9.29748157809236   | h  |
| 5.62851101754803   | -3.37577098424482  | 6.23112892946910   | h  |
| 0.18354497833301   | -7.37091766145536  | 13.41626328270377  | h  |
| 3.37083514102358   | -6.40798274928285  | 13.98276460288106  | h  |
| 2.58404876488124   | -8.01869176436123  | 11.12354267506801  | h  |
| -3.55901692263565  | -8.56324169167550  | 12.60780676679408  | h  |
| -6.76395270957273  | -9.35925043880511  | 11.91535302715851  | h  |
| -6.00309693998178  | -6.24992099783403  | 12.98418114252139  | h  |
| -8.15388959476659  | -3.05824961848852  | 10.90145385753591  | h  |
| -10.46939008487750 | -4.68037236071291  | 9.05446231941977   | h  |
| -9.00103544662392  | -1.88883428039659  | 7.83814186803382   | h  |
| -8.30826305572972  | -2.29750324770314  | 3.59236759424072   | h  |
| -9.13469548777330  | -5.32492459589452  | 2.33929002861995   | h  |
| -2.80192909185895  | -12.34462280719612 | 7.35456262319836   | h  |
| -1.06117803236533  | -10.56719374272989 | 9.64124272919426   | h  |
| 1.78318930514332   | 3.30200957414324   | -7.16763886349667  | sm |
| 4.07709212774888   | -0.45731218354638  | -5.74759536805681  | o  |
| 7.64389233402383   | -0.38916539425047  | 1.66061832942548   | o  |
| 8.42717669099174   | -6.59800891338251  | -3.14088427029620  | h  |
| -7.64389233402383  | 0.38916539425047   | -1.66061832942548  | o  |
| -8.42717669099174  | 6.59800891338251   | 3.14088427029620   | h  |
| 0.40795397338395   | 2.18453943025486   | -12.07873698785783 | c  |
| -0.07770128321246  | -0.09986174230099  | -10.69051279011860 | c  |
| -2.17575650589761  | 0.34400293845232   | -9.03135901435163  | c  |
| -2.96862495906891  | 2.92337806925662   | -9.35890419440760  | c  |
| -1.39450970367666  | 4.05754161134582   | -11.26034567740833 | c  |
| 2.17265642986943   | 2.37553255196255   | -14.31020805081359 | c  |
| 4.06896667688130   | 1.54658916540217   | -13.92783047454714 | h  |
| 5.01166817180806   | 7.02416867477306   | -9.04747113422561  | c  |
| 6.60112232592085   | 5.24101975043352   | -7.74965263201640  | c  |
| 6.09346984423898   | 5.44102773515431   | -5.09040867286935  | c  |
| 4.16669815937705   | 7.31732441659832   | -4.74387445190720  | c  |
| 3.47367795887806   | 8.28311311288499   | -7.19037144678284  | c  |
| 6.30151262952021   | 3.78758117624112   | -1.31866403056142  | h  |
| 3.35980923432758   | 8.37410012918407   | -2.22500965481500  | c  |
| 1.61343921050214   | 9.52597021245538   | -2.37979837258176  | h  |
| 0.10076073139300   | 10.56145718230255  | -6.39996945398965  | h  |
| 1.20205527705110   | -2.60676913646137  | -11.13108939159972 | c  |
| -3.54037090653826  | -1.65408925850197  | -7.53178116228782  | c  |
| -5.24884940984899  | 4.13737352952838   | -8.15038245633127  | c  |
| -1.89023170756321  | 6.58040263120611   | -12.48852125013313 | c  |
| 1.39286980806141   | 1.33462027378946   | -15.97121255222883 | h  |
| 2.46724935394189   | 4.35912978906613   | -14.91622286173705 | h  |
| 5.32944873433165   | 7.81797217415682   | -11.76385801668370 | c  |
| 8.63777003844294   | 3.63944411794481   | -8.93982046783552  | c  |
| 7.51305364711749   | 4.14418642540478   | -2.99424076809535  | c  |
| 1.77773474027829   | 10.52665089473395  | -7.66982352044432  | c  |
| 3.02251941421462   | 6.87407994909831   | -0.78811952497691  | h  |
| 4.85304170093745   | 9.64294039780382   | -1.44062560932387  | h  |
| 0.28002543342829   | -3.66768437535914  | -12.70512977521019 | h  |

|                   |                   |                    |   |
|-------------------|-------------------|--------------------|---|
| 3.22667841315263  | -2.39036180108854 | -11.64985572369383 | h |
| 1.11961022520536  | -3.83644784384298 | -9.43193776351306  | h |
| -4.71739952880760 | -0.84819085104369 | -5.99370783716648  | h |
| -4.83664334253267 | -2.75857708730358 | -8.77737499803404  | h |
| -2.23256236147107 | -3.03991339732728 | -6.64472157963781  | h |
| -5.03583437681593 | 6.22118700295160  | -7.97200441008728  | h |
| -6.98907456220912 | 3.80890437628144  | -9.29748157809236  | h |
| -5.62851101754803 | 3.37577098424482  | -6.23112892946910  | h |
| -0.18354497833301 | 7.37091766145536  | -13.41626328270377 | h |
| -3.37083514102358 | 6.40798274928285  | -13.98276460288106 | h |
| -2.58404876488124 | 8.01869176436123  | -11.12354267506801 | h |
| 3.55901692263565  | 8.56324169167550  | -12.60780676679408 | h |
| 6.76395270957273  | 9.35925043880511  | -11.91535302715851 | h |
| 6.00309693998178  | 6.24992099783403  | -12.98418114252139 | h |
| 8.15388959476659  | 3.05824961848852  | -10.90145385753591 | h |
| 10.46939008487750 | 4.68037236071291  | -9.05446231941977  | h |
| 9.00103544662392  | 1.88883428039659  | -7.83814186803382  | h |
| 8.30826305572972  | 2.29750324770314  | -3.59236759424072  | h |
| 9.13469548777330  | 5.32492459589452  | -2.33929002861995  | h |
| 2.80192909185895  | 12.34462280719612 | -7.35456262319836  | h |
| 1.06117803236533  | 10.56719374272989 | -9.64124272919426  | h |

\$end

**[ (Cp\*<sub>2</sub>Sm)<sub>2</sub>As<sub>4</sub> (CpMo (CO)<sub>2</sub>)<sub>2</sub> ]**

\$coord

|                   |                    |                   |    |
|-------------------|--------------------|-------------------|----|
| -1.67074225859131 | -3.57202644198630  | 7.31005257604808  | sm |
| 1.08629884302212  | -2.10347864415570  | 2.28090010249214  | as |
| -4.05951727334769 | 0.10291635673187   | 5.90195748440993  | o  |
| -4.00296297578548 | 1.54719384568103   | 4.11389483733735  | c  |
| -0.55284173117168 | -1.69157843735277  | 12.02630895593694 | c  |
| 0.53296546165556  | 0.12639360492628   | 10.32176584327659 | c  |
| 2.64115499841781  | -1.03864481863425  | 9.07523071586693  | c  |
| 2.84350146867663  | -3.59314545594962  | 9.98374640800847  | c  |
| 0.91073108044680  | -3.98252200351637  | 11.85002927119108 | c  |
| -2.62875124961280 | -1.15079524794567  | 13.90776749447352 | c  |
| -4.09272569790213 | 0.14236044721159   | 13.12920231360851 | h  |
| -4.82227552559529 | -7.38621603220103  | 9.10070853487920  | c  |
| -6.42395542029837 | -5.68984372431032  | 7.70521083415512  | c  |
| -5.79386010619132 | -5.90480064189028  | 5.07482949216362  | c  |
| -3.77289808268171 | -7.70151294733448  | 4.84412947056194  | c  |
| -3.15378242787162 | -8.60738293012259  | 7.33283999496193  | c  |
| -5.88033321471450 | -4.18093257372713  | 1.32320516342564  | h  |
| -2.79013119242207 | -8.75354831040690  | 2.38676494072799  | c  |
| -0.89858752907096 | -9.63651835755186  | 2.60258961379115  | h  |
| 0.36157625408780  | -10.70290330494094 | 6.69760025728240  | h  |
| 0.96762705302857  | 2.69497972190906   | 1.71958615063153  | as |
| -0.96762705302857 | -2.69497972190906  | -1.71958615063153 | as |
| 3.96847218056465  | -3.93989276364613  | -1.45508406178349 | mo |
| -3.96847218056465 | 3.93989276364613   | 1.45508406178349  | mo |
| -0.22604178454568 | 2.86302005553786   | 10.09489116295379 | c  |
| 4.57198043601519  | 0.30465071002319   | 7.47045454490632  | c  |
| 4.93014452794467  | -5.42604414425612  | 9.33548473468867  | c  |
| 0.81865861610352  | -6.17831634623733  | 13.66171891542897 | c  |
| -1.87181295672570 | -0.22416823405767  | 15.64552019263348 | h  |
| -3.60915231017267 | -2.89923587492986  | 14.53437095617117 | h  |
| -5.23787693200988 | -8.13019641158141  | 11.81877044507203 | c  |
| -8.57157618811327 | -4.16701723841011  | 8.79937791209640  | c  |
| -7.16840120074423 | -4.68083066705208  | 2.90485751969557  | c  |

|                    |                    |                    |    |
|--------------------|--------------------|--------------------|----|
| -1.35860162276418  | -10.74949095623181 | 7.90654525771610   | c  |
| -2.64428259470701  | -7.28077502143722  | 0.89138033641360   | h  |
| -4.07768731303790  | -10.25329383038213 | 1.64567432673259   | h  |
| -1.08629884302212  | 2.10347864415570   | -2.28090010249214  | as |
| 4.00296297578548   | -1.54719384568103  | -4.11389483733735  | c  |
| 6.38242465331540   | -1.67334271342804  | 0.24281492597432   | c  |
| 2.74450285586840   | -8.28932967504499  | -2.16729900214415  | c  |
| 0.76997958703669   | -8.88308624215980  | -2.39121058636971  | h  |
| 4.14925454837950   | -8.27892530400316  | 0.14701083748460   | c  |
| 3.43582042944635   | -8.83458537194492  | 2.01423203267513   | h  |
| 6.65469366589097   | -7.42306170899789  | -0.39636134225539  | c  |
| 8.19876766819848   | -7.23009350967711  | 0.97771846721871   | h  |
| 6.82199083418840   | -6.91305857342786  | -3.05788248476163  | c  |
| 4.39139784554350   | -7.45309183590533  | -4.15200168532408  | c  |
| 3.90449623731051   | -7.32481401580998  | -6.16457465871186  | h  |
| -6.38242465331540  | 1.67334271342804   | -0.24281492597432  | c  |
| -2.74450285586840  | 8.28932967504499   | 2.16729900214415   | c  |
| -0.76997958703669  | 8.88308624215980   | 2.39121058636971   | h  |
| -4.14925454837950  | 8.27892530400316   | -0.14701083748460  | c  |
| -3.43582042944635  | 8.83458537194492   | -2.01423203267513  | h  |
| -6.65469366589097  | 7.42306170899789   | 0.39636134225539   | c  |
| -8.19876766819848  | 7.23009350967711   | -0.97771846721871  | h  |
| -6.82199083418840  | 6.91305857342786   | 3.05788248476163   | c  |
| -4.39139784554350  | 7.45309183590533   | 4.15200168532408   | c  |
| -3.90449623731051  | 7.32481401580998   | 6.16457465871186   | h  |
| 0.86866919390772   | 4.06918179504626   | 11.43582240635534  | h  |
| -2.25965076173853  | 3.15882178344993   | 10.52605572022912  | h  |
| 0.11786222453470   | 3.62259760064177   | 8.16581436692709   | h  |
| 5.56064653373770   | -0.98056716186087  | 6.13911841397577   | h  |
| 6.05815461128620   | 1.18302962337507   | 8.68490648705436   | h  |
| 3.73705158089253   | 1.85738920935867   | 6.32738473789822   | h  |
| 4.33654717496732   | -7.42600537036787  | 9.59118547260536   | h  |
| 6.62237949621648   | -5.13872215046163  | 10.56322983344189  | h  |
| 5.58362873520197   | -5.20782425030127  | 7.34928662107951   | h  |
| -1.01358434731331  | -6.30261135834362  | 14.67001231037389  | h  |
| 2.31393187316285   | -5.97284289888349  | 15.13695597372505  | h  |
| 1.15574653102980   | -8.02977011897993  | 12.72627779071609  | h  |
| -3.60983841562023  | -9.17988694397071  | 12.61720339811103  | h  |
| -6.91898507496937  | -9.39474237968520  | 11.98225385557955  | h  |
| -5.61052373995652  | -6.48519697483237  | 13.07275875788773  | h  |
| -8.17394060416286  | -3.52666364474619  | 10.76200899269946  | h  |
| -10.35216498201193 | -5.29644322551709  | 8.88354690118174   | h  |
| -8.98786832423022  | -2.45782322939604  | 7.65258517889392   | h  |
| -8.15333237402849  | -2.92170055307073  | 3.48198134637663   | h  |
| -8.63785579738847  | -5.97319410628217  | 2.11636492998301   | h  |
| -2.26751578366588  | -12.62591376654710 | 7.58012196458057   | h  |
| -0.71189493741426  | -10.73076213981521 | 9.90369947178984   | h  |
| 1.67074225859131   | 3.57202644198630   | -7.31005257604808  | sm |
| 4.05951727334769   | -0.10291635673187  | -5.90195748440993  | o  |
| 7.95890678412235   | -0.44693132862878  | 1.20770964161289   | o  |
| 8.52235211007814   | -6.31273296985642  | -4.08252292722737  | h  |
| -7.95890678412235  | 0.44693132862878   | -1.20770964161289  | o  |
| -8.52235211007814  | 6.31273296985642   | 4.08252292722737   | h  |
| 0.55284173117168   | 1.69157843735277   | -12.02630895593694 | c  |
| -0.53296546165556  | -0.12639360492628  | -10.32176584327659 | c  |
| -2.64115499841781  | 1.03864481863425   | -9.07523071586693  | c  |
| -2.84350146867663  | 3.59314545594962   | -9.98374640800847  | c  |
| -0.91073108044680  | 3.98252200351637   | -11.85002927119108 | c  |
| 2.62875124961280   | 1.15079524794567   | -13.90776749447352 | c  |

|                   |                   |                    |   |
|-------------------|-------------------|--------------------|---|
| 4.09272569790213  | -0.14236044721159 | -13.12920231360851 | h |
| 4.82227552559529  | 7.38621603220103  | -9.10070853487920  | c |
| 6.42395542029837  | 5.68984372431032  | -7.70521083415512  | c |
| 5.79386010619132  | 5.90480064189028  | -5.07482949216362  | c |
| 3.77289808268171  | 7.70151294733448  | -4.84412947056194  | c |
| 3.15378242787162  | 8.60738293012259  | -7.33283999496193  | c |
| 5.88033321471450  | 4.18093257372713  | -1.32320516342564  | h |
| 2.79013119242207  | 8.75354831040690  | -2.38676494072799  | c |
| 0.89858752907096  | 9.63651835755186  | -2.60258961379115  | h |
| -0.36157625408780 | 10.70290330494094 | -6.69760025728240  | h |
| 0.22604178454568  | -2.86302005553786 | -10.09489116295379 | c |
| -4.57198043601519 | -0.30465071002319 | -7.47045454490632  | c |
| -4.93014452794467 | 5.42604414425612  | -9.33548473468867  | c |
| -0.81865861610352 | 6.17831634623733  | -13.66171891542897 | c |
| 1.87181295672570  | 0.22416823405767  | -15.64552019263348 | h |
| 3.60915231017267  | 2.89923587492986  | -14.53437095617117 | h |
| 5.23787693200988  | 8.13019641158141  | -11.81877044507203 | c |
| 8.57157618811327  | 4.16701723841011  | -8.79937791209640  | c |
| 7.16840120074423  | 4.68083066705208  | -2.90485751969557  | c |
| 1.35860162276418  | 10.74949095623181 | -7.90654525771610  | c |
| 2.64428259470701  | 7.28077502143722  | -0.89138033641360  | h |
| 4.07768731303790  | 10.25329383038213 | -1.64567432673259  | h |
| -0.86866919390772 | -4.06918179504626 | -11.43582240635534 | h |
| 2.25965076173853  | -3.15882178344993 | -10.52605572022912 | h |
| -0.11786222453470 | -3.62259760064177 | -8.16581436692709  | h |
| -5.56064653373770 | 0.98056716186087  | -6.13911841397577  | h |
| -6.05815461128620 | -1.18302962337507 | -8.68490648705436  | h |
| -3.73705158089253 | -1.85738920935867 | -6.32738473789822  | h |
| -4.33654717496732 | 7.42600537036787  | -9.59118547260536  | h |
| -6.62237949621648 | 5.13872215046163  | -10.56322983344189 | h |
| -5.58362873520197 | 5.20782425030127  | -7.34928662107951  | h |
| 1.01358434731331  | 6.30261135834362  | -14.67001231037389 | h |
| -2.31393187316285 | 5.97284289888349  | -15.13695597372505 | h |
| -1.15574653102980 | 8.02977011897993  | -12.72627779071609 | h |
| 3.60983841562023  | 9.17988694397071  | -12.61720339811103 | h |
| 6.91898507496937  | 9.39474237968520  | -11.98225385557955 | h |
| 5.61052373995652  | 6.48519697483237  | -13.07275875788773 | h |
| 8.17394060416286  | 3.52666364474619  | -10.76200899269946 | h |
| 10.35216498201193 | 5.29644322551709  | -8.88354690118174  | h |
| 8.98786832423022  | 2.45782322939604  | -7.65258517889392  | h |
| 8.15333237402849  | 2.92170055307073  | -3.48198134637663  | h |
| 8.63785579738847  | 5.97319410628217  | -2.11636492998301  | h |
| 2.26751578366588  | 12.62591376654710 | -7.58012196458057  | h |
| 0.71189493741426  | 10.73076213981521 | -9.90369947178984  | h |

\$end

**[ (Cp\*<sub>2</sub>Sm)<sub>2</sub>Sb<sub>4</sub>(CpMo(CO)<sub>2</sub>)<sub>2</sub> ]**

\$coord

|                   |                   |                   |    |
|-------------------|-------------------|-------------------|----|
| -1.68828179549622 | -3.77093926924872 | 7.76539518969793  | sm |
| 1.40373020157385  | -2.55653461021697 | 2.42784869185162  | sb |
| -3.89639702578690 | -0.07404800534748 | 6.16538469269920  | o  |
| -3.93171000385678 | 1.51637876886283  | 4.49980215128170  | c  |
| -0.67989972384947 | -1.75048760464140 | 12.44950490428663 | c  |
| 0.57653888088139  | -0.05920707260514 | 10.73103827583295 | c  |
| 2.68012523480891  | -1.37710450681590 | 9.63728325433996  | c  |
| 2.71008248673173  | -3.89853525145930 | 10.65529124981851 | c  |
| 0.67699815933900  | -4.11189869552847 | 12.44104160307789 | c  |
| -2.82080579232591 | -1.03807619864156 | 14.19550013072626 | c  |

|                   |                    |                   |    |
|-------------------|--------------------|-------------------|----|
| -4.18437706409862 | 0.28171466689686   | 13.28946243380135 | h  |
| -4.94255064856586 | -7.49522392187640  | 9.51640491290922  | c  |
| -6.45098158672522 | -5.88604232770639  | 7.92789884265590  | c  |
| -5.64954830459526 | -6.23745776881278  | 5.35950122865203  | c  |
| -3.60586414834834 | -8.02726706751336  | 5.36132762653695  | c  |
| -3.15568877287386 | -8.79683077751299  | 7.93078473067664  | c  |
| -5.60031116524212 | -4.87216462729815  | 1.46006578891914  | h  |
| -2.42170598703923 | -9.21280902468590  | 3.05579821027258  | c  |
| -0.46111191651442 | -9.87286510312827  | 3.42407191381950  | h  |
| 0.42790188989050  | -10.85502438040541 | 7.67634895396639  | h  |
| 1.24103244565777  | 2.98068238281689   | 2.11496134137798  | sb |
| -1.24103244565777 | -2.98068238281689  | -2.11496134137798 | sb |
| 4.13971105643809  | -4.10840233674956  | -2.03253305833014 | mo |
| -4.13971105643809 | 4.10840233674956   | 2.03253305833014  | mo |
| -0.02682220280216 | 2.70167875047456   | 10.37480758885389 | c  |
| 4.77675352069091  | -0.19277772965463  | 8.11479793442684  | c  |
| 4.74558371940154  | -5.84550597718644  | 10.20748197490046 | c  |
| 0.40725002966870  | -6.20552222034233  | 14.35246876694171 | c  |
| -2.11182088400802 | -0.07092831946894  | 15.93151144922203 | h  |
| -3.90965513434481 | -2.71382331538701  | 14.84109803513494 | h  |
| -5.54698978464702 | -8.09298018172198  | 12.23550362009982 | c  |
| -8.67898307359654 | -4.33085846822328  | 8.79095134364676  | c  |
| -6.93139294069914 | -5.15766627173934  | 3.05990449530255  | c  |
| -1.39522102156532 | -10.89618012122032 | 8.72324345882874  | c  |
| -2.34902583462074 | -7.88517902575007  | 1.42816024374582  | h  |
| -3.52240628672278 | -10.90047731017118 | 2.42657190755069  | h  |
| -1.40373020157385 | 2.55653461021697   | -2.42784869185162 | sb |
| 3.93171000385678  | -1.51637876886283  | -4.49980215128170 | c  |
| 6.58641013888576  | -1.86001766107658  | -0.35542582523870 | c  |
| 2.99476749266547  | -8.40961542691620  | -3.09519728791971 | c  |
| 1.04240075183485  | -9.05137807998664  | -3.38056788376084 | h  |
| 4.38894733132142  | -8.54947982355113  | -0.77829798658601 | c  |
| 3.67393010015432  | -9.27782880618056  | 1.02789317386424  | h  |
| 6.87724981291881  | -7.59442569059797  | -1.23499404152252 | c  |
| 8.41172251058403  | -7.48178540694591  | 0.15884182301451  | h  |
| 7.04248194592751  | -6.86617745753718  | -3.84985023383268 | c  |
| 4.62839960602959  | -7.37200324886496  | -4.99585233759877 | c  |
| 4.14553728994779  | -7.09577785780687  | -6.99471317584534 | h  |
| -6.58641013888576 | 1.86001766107658   | 0.35542582523870  | c  |
| -2.99476749266547 | 8.40961542691620   | 3.09519728791971  | c  |
| -1.04240075183485 | 9.05137807998664   | 3.38056788376084  | h  |
| -4.38894733132142 | 8.54947982355113   | 0.77829798658601  | c  |
| -3.67393010015432 | 9.27782880618056   | -1.02789317386424 | h  |
| -6.87724981291881 | 7.59442569059797   | 1.23499404152252  | c  |
| -8.41172251058403 | 7.48178540694591   | -0.15884182301451 | h  |
| -7.04248194592751 | 6.86617745753718   | 3.84985023383268  | c  |
| -4.62839960602959 | 7.37200324886496   | 4.99585233759877  | c  |
| -4.14553728994779 | 7.09577785780687   | 6.99471317584534  | h  |
| 1.08563247435999  | 3.90078998174740   | 11.70741527364035 | h  |
| -2.05504001343668 | 3.11596222416525   | 10.72673689471089 | h  |
| 0.41604824208032  | 3.37006541026679   | 8.43157928761852  | h  |
| 5.73180044326944  | -1.56278102033539  | 6.84172229714948  | h  |
| 6.26388316309214  | 0.58756166268178   | 9.39369176608325  | h  |
| 4.11099070493279  | 1.40416222940307   | 6.92247031553395  | h  |
| 4.04859972676471  | -7.80500201259881  | 10.50846859115922 | h  |
| 6.37675998515300  | -5.57563196638242  | 11.51962507143639 | h  |
| 5.52019102720423  | -5.74658053251113  | 8.25598255012378  | h  |
| -1.48654735773806 | -6.23083057354567  | 15.24791706016974 | h  |
| 1.81290738995785  | -5.95766916151409  | 15.90713661968389 | h  |

|                    |                    |                    |    |
|--------------------|--------------------|--------------------|----|
| 0.75211439650116   | -8.11046068793287  | 13.53631159871314  | h  |
| -4.00478321867437  | -9.14923972297282  | 13.18118820155460  | h  |
| -7.27405966097227  | -9.29871808294088  | 12.35147461177668  | h  |
| -5.94249404890174  | -6.37920135430635  | 13.38703184929274  | h  |
| -8.43101310619747  | -3.60201309338675  | 10.74734406993608  | h  |
| -10.45594545521051 | -5.46947093446582  | 8.79328295497328   | h  |
| -9.01647903504226  | -2.67798553102955  | 7.54128570324877   | h  |
| -7.82816657193087  | -3.30082292935179  | 3.44495086323548   | h  |
| -8.45755778951425  | -6.44412468005512  | 2.37563196368716   | h  |
| -2.24877743339870  | -12.79198877561821 | 8.36095471115043   | h  |
| -0.93946152093337  | -10.82018761957916 | 10.77030174730071  | h  |
| 1.68828179549622   | 3.77093926924872   | -7.76539518969793  | sm |
| 3.89639702578690   | 0.07404800534748   | -6.16538469269920  | o  |
| 8.19245063793002   | -0.62719741630321  | 0.55541013288706   | o  |
| 8.73451939114348   | -6.15694565431192  | -4.81690632967977  | h  |
| -8.19245063793002  | 0.62719741630321   | -0.55541013288706  | o  |
| -8.73451939114348  | 6.15694565431192   | 4.81690632967977   | h  |
| 0.67989972384947   | 1.75048760464140   | -12.44950490428663 | c  |
| -0.57653888088139  | 0.05920707260514   | -10.73103827583295 | c  |
| -2.68012523480891  | 1.37710450681590   | -9.63728325433996  | c  |
| -2.71008248673173  | 3.89853525145930   | -10.65529124981851 | c  |
| -0.67699815933900  | 4.11189869552847   | -12.44104160307789 | c  |
| 2.82080579232591   | 1.03807619864156   | -14.19550013072626 | c  |
| 4.18437706409862   | -0.28171466689686  | -13.28946243380135 | h  |
| 4.94255064856586   | 7.49522392187640   | -9.51640491290922  | c  |
| 6.45098158672522   | 5.88604232770639   | -7.92789884265590  | c  |
| 5.64954830459526   | 6.23745776881278   | -5.35950122865203  | c  |
| 3.60586414834834   | 8.02726706751336   | -5.36132762653695  | c  |
| 3.15568877287386   | 8.79683077751299   | -7.93078473067664  | c  |
| 5.60031116524212   | 4.87216462729815   | -1.46006578891914  | h  |
| 2.42170598703923   | 9.21280902468590   | -3.05579821027258  | c  |
| 0.46111191651442   | 9.87286510312827   | -3.42407191381950  | h  |
| -0.42790188989050  | 10.85502438040541  | -7.67634895396639  | h  |
| 0.02682220280216   | -2.70167875047456  | -10.37480758885389 | c  |
| -4.77675352069091  | 0.19277772965463   | -8.11479793442684  | c  |
| -4.74558371940154  | 5.84550597718644   | -10.20748197490046 | c  |
| -0.40725002966870  | 6.20552222034233   | -14.35246876694171 | c  |
| 2.11182088400802   | 0.07092831946894   | -15.93151144922203 | h  |
| 3.90965513434481   | 2.71382331538701   | -14.84109803513494 | h  |
| 5.54698978464702   | 8.09298018172198   | -12.23550362009982 | c  |
| 8.67898307359654   | 4.33085846822328   | -8.79095134364676  | c  |
| 6.93139294069914   | 5.15766627173934   | -3.05990449530255  | c  |
| 1.39522102156532   | 10.89618012122032  | -8.72324345882874  | c  |
| 2.34902583462074   | 7.88517902575007   | -1.42816024374582  | h  |
| 3.52240628672278   | 10.90047731017118  | -2.42657190755069  | h  |
| -1.08563247435999  | -3.90078998174740  | -11.70741527364035 | h  |
| 2.05504001343668   | -3.11596222416525  | -10.72673689471089 | h  |
| -0.41604824208032  | -3.37006541026679  | -8.43157928761852  | h  |
| -5.73180044326944  | 1.56278102033539   | -6.84172229714948  | h  |
| -6.26388316309214  | -0.58756166268178  | -9.39369176608325  | h  |
| -4.11099070493279  | -1.40416222940307  | -6.92247031553395  | h  |
| -4.04859972676471  | 7.80500201259881   | -10.50846859115922 | h  |
| -6.37675998515300  | 5.57563196638242   | -11.51962507143639 | h  |
| -5.52019102720423  | 5.74658053251113   | -8.25598255012378  | h  |
| 1.48654735773806   | 6.23083057354567   | -15.24791706016974 | h  |
| -1.81290738995785  | 5.95766916151409   | -15.90713661968389 | h  |
| -0.75211439650116  | 8.11046068793287   | -13.53631159871314 | h  |
| 4.00478321867437   | 9.14923972297282   | -13.18118820155460 | h  |
| 7.27405966097227   | 9.29871808294088   | -12.35147461177668 | h  |

|                   |                   |                    |   |
|-------------------|-------------------|--------------------|---|
| 5.94249404890174  | 6.37920135430635  | -13.38703184929274 | h |
| 8.43101310619747  | 3.60201309338675  | -10.74734406993608 | h |
| 10.45594545521051 | 5.46947093446582  | -8.79328295497328  | h |
| 9.01647903504226  | 2.67798553102955  | -7.54128570324877  | h |
| 7.82816657193087  | 3.30082292935179  | -3.44495086323548  | h |
| 8.45755778951425  | 6.44412468005512  | -2.37563196368716  | h |
| 2.24877743339870  | 12.79198877561821 | -8.36095471115043  | h |
| 0.93946152093337  | 10.82018761957916 | -10.77030174730071 | h |

\$end

**[ (Cp\*<sub>2</sub>Sm)<sub>2</sub>P<sub>2</sub>(CpMo(CO)<sub>2</sub>)<sub>4</sub> ]**

\$coord

|                   |                    |                   |    |
|-------------------|--------------------|-------------------|----|
| 1.90356771096552  | -13.82780997794361 | 8.09476342636310  | h  |
| 0.08211603739826  | -14.84064661257787 | 10.74726516049071 | h  |
| 1.38048805685841  | -13.32252603750002 | 10.06847764601616 | c  |
| 0.14066600509391  | -10.76224934872484 | 10.25449320051928 | c  |
| 3.12112714073763  | -13.44563568616778 | 11.22890021337130 | h  |
| 2.10092103571845  | -6.38492721195089  | 8.10816518307474  | sm |
| 0.36397755568221  | -9.00423850163181  | 12.32149567554782 | c  |
| -1.79590230504064 | -9.84821097918944  | 8.58545183070928  | c  |
| 0.74319789294018  | -6.52469202831998  | 3.74223272256591  | o  |
| 0.55003418650125  | -2.08237533365746  | 7.85776959087659  | o  |
| -2.76620920143993 | -7.53080472671945  | 9.60869241545036  | c  |
| -1.42345846429165 | -6.99812233140537  | 11.90976645972374 | c  |
| 6.59216882802418  | -4.82037634554831  | 6.05057050544318  | c  |
| 6.84076473563896  | -7.51541582233935  | 6.30238340130979  | c  |
| 7.00379813391204  | -8.09846252828288  | 8.95238991760330  | c  |
| 6.82264175374615  | -5.76237564011030  | 10.33666568065411 | c  |
| 6.58092828672068  | -3.74123935246655  | 8.53862188205494  | c  |
| 1.83608764974334  | -9.42495948761311  | 14.72422425992915 | c  |
| -2.81861583239670 | -11.23168764355240 | 6.31397022245109  | c  |
| -0.25727928763731 | -6.08483265708702  | 1.71891498492067  | c  |
| -0.29230201746296 | -0.25171524264328  | 6.75056986776583  | c  |
| -4.96431295425693 | -6.05316826444658  | 8.56388044981953  | c  |
| -1.95912392458141 | -4.84777179361637  | 13.70720622098204 | c  |
| 6.53824524869152  | -3.36425071824689  | 3.60665134948393  | c  |
| 7.12885069276247  | -9.37686703796370  | 4.16083061799160  | c  |
| 7.73598238552281  | -10.62901569377198 | 10.03742216574313 | c  |
| 7.25185394811465  | -5.41386037669422  | 13.13356051637119 | c  |
| 6.58056496835013  | -0.96160052064429  | 9.15856840234586  | c  |
| 3.56000465712440  | -10.58247200358889 | 14.41666378961370 | h  |
| 0.66624843520293  | -10.45040438081274 | 16.15008696860871 | h  |
| 2.44097848920116  | -7.62641155855568  | 15.62348206225414 | h  |
| -3.63401368721870 | -9.91939057110418  | 4.89285809490443  | h  |
| -4.34878677136259 | -12.57495669091537 | 6.86633580451222  | h  |
| -1.34383267568782 | -12.36301345091215 | 5.33415558082296  | h  |
| -1.91600851905915 | -5.60223195952037  | -1.42085844039228 | mo |
| -1.86880115641737 | 2.54846680460043   | 5.16194830389134  | mo |
| -5.08692886285031 | -4.14189784719259  | 9.42006932870557  | h  |
| -6.79599417477169 | -7.02273111384835  | 8.95582499067169  | h  |
| -4.84033625755588 | -5.80230031420761  | 6.47889888885508  | h  |
| -0.27097932351031 | -4.32901275655627  | 14.84565845969101 | h  |
| -3.48015973446011 | -5.35026951228932  | 15.07926092020742 | h  |
| -2.58655985693750 | -3.11038990699165  | 12.70664522539090 | h  |
| 5.87646683725665  | -4.55422279525195  | 2.01240951781937  | h  |
| 8.45853102389689  | -2.65201202548841  | 3.09805537519307  | h  |
| 5.25592197242283  | -1.70048551107901  | 3.69376035480007  | h  |
| 6.55348445903592  | -11.31969118633847 | 4.71723412265538  | h  |



|                   |                    |                   |    |
|-------------------|--------------------|-------------------|----|
| 9.13293780692740  | -9.50294057619071  | 3.51500659684348  | h  |
| 5.98152327819959  | -8.84944279294513  | 2.48146967248079  | h  |
| 7.07377134568825  | -10.87798413203554 | 12.01364597343476 | h  |
| 9.83457879965779  | -10.84627351228467 | 10.07195621557833 | h  |
| 6.98482102072954  | -12.23570913505160 | 8.91382063016230  | h  |
| 6.02755089525628  | -3.91612612741192  | 13.95905796823409 | h  |
| 9.24324353119316  | -4.83747587048168  | 13.52644024980660 | h  |
| 6.90497537295617  | -7.17493145825401  | 14.21613815688883 | h  |
| 5.59253492263073  | 0.16753223813006   | 7.69078661649376  | h  |
| 8.54839723563512  | -0.21431684668023  | 9.29918258877744  | h  |
| 5.64257359737058  | -0.54736469306986  | 10.99188015272151 | h  |
| -0.37370935043335 | -1.32678159580865  | -1.39778034103990 | p  |
| 0.66894045389344  | -7.98229728800628  | -2.64639287463843 | c  |
| -5.70346594583326 | -5.32631444775160  | -4.08890125067730 | c  |
| -5.06678751805721 | -7.92363168821016  | -3.68749897968717 | c  |
| -5.29699868189718 | -8.45229269008998  | -1.03390220663511 | c  |
| -6.05424491780566 | -6.15378296922591  | 0.20147689730432  | c  |
| -6.30282010700578 | -4.23133975575233  | -1.68912355291294 | c  |
| 0.37367478591021  | 1.32691278654713   | 1.39725321626528  | p  |
| 0.40306547991436  | 4.58516519979074   | 7.30252584056615  | c  |
| -5.93508677011619 | 0.78489083630900   | 5.64908335755252  | c  |
| -5.98917018886709 | 2.04351707447595   | 3.25373842266431  | c  |
| -5.68917091194122 | 4.69579525456620   | 3.69129949608418  | c  |
| -5.41223532796580 | 5.08303964003577   | 6.35377920932022  | c  |
| -5.58210229817507 | 2.66615740506838   | 7.57907877889192  | c  |
| 1.86852153773465  | -2.54866476390573  | -5.16259221471653 | mo |
| 2.02979493585107  | -9.62644096402178  | -3.27067199515015 | o  |
| -5.72439804537278 | -4.35510083831723  | -5.91957350529021 | h  |
| -4.54333409395309 | -9.28229203635167  | -5.16612476783811 | h  |
| -5.02600428734452 | -10.29902776588341 | -0.12848920143749 | h  |
| -6.45814798747980 | -5.93221572354875  | 2.22422250155970  | h  |
| -6.89339778750961 | -2.27053399482378  | -1.36719896278092 | h  |
| 1.91580149914833  | 5.60229514799979   | 1.42102034371785  | mo |
| 1.57145101615606  | 5.76104100904414   | 8.78208696334479  | o  |
| -6.17669120926303 | -1.25056285974492  | 5.96078823062644  | h  |
| -6.22691717010170 | 1.13741110188645   | 1.40550596767580  | h  |
| -5.65991509848002 | 6.18125167214940   | 2.24681031182806  | h  |
| -5.16605925364497 | 6.91748681820019   | 7.29244863468908  | h  |
| -5.53048768023810 | 2.32859105180701   | 9.62561827926829  | h  |
| 0.29235540388970  | 0.25190519169878   | -6.75087513806838 | c  |
| -0.40400026921222 | -4.58443699891604  | -7.30336853524239 | c  |
| 5.93516969680289  | -0.78599175496551  | -5.64999477434394 | c  |
| 5.98896407385892  | -2.04456142377817  | -3.25463133556770 | c  |
| 5.68842666640761  | -4.69680093837260  | -3.69215789894815 | c  |
| 5.41146509594834  | -5.08403422922288  | -6.35460849427201 | c  |
| 5.58184677636952  | -2.66724152436628  | -7.57991439480456 | c  |
| 0.25770401879387  | 6.08486331572431   | -1.71897146788832 | c  |
| -0.66972588892268 | 7.98179839453299   | 2.64636589824481  | c  |
| 5.70260665711312  | 5.32591158816372   | 4.08966371734787  | c  |
| 5.06601264820464  | 7.92330168935026   | 3.68862949783249  | c  |
| 5.29676360092292  | 8.45237684566326   | 1.03515302925711  | c  |
| 6.05421848734996  | 6.15404912676045   | -0.20042118335814 | c  |
| 6.30239137684201  | 4.23133212189261   | 1.68984969357651  | c  |
| -0.54992927424244 | 2.08255649009782   | -7.85803534697720 | o  |
| -1.57306378664570 | -5.75977925639165  | -8.78293197783061 | o  |
| 6.17723505739085  | 1.24923434691638   | -5.96175607763634 | h  |
| 6.22687860561260  | -1.13856212466812  | -1.40651374963345 | h  |
| 5.65886280926115  | -6.18216177327902  | -2.24763794015559 | h  |
| 5.16488853095192  | -6.91839140806041  | -7.29322398329627 | h  |

|                   |                   |                    |    |
|-------------------|-------------------|--------------------|----|
| 5.53028078725466  | -2.32974450050334 | -9.62634930711652  | h  |
| -0.74285318968149 | 6.52438211526060  | -3.74236964740692  | o  |
| -2.03108841232590 | 9.62558744790318  | 3.27048247609544   | o  |
| 5.72321257567880  | 4.35440983226781  | 5.92004920495138   | h  |
| 4.54234900900737  | 9.28163666553007  | 5.16730482443536   | h  |
| 5.02600395252594  | 10.29911935858699 | 0.13003934291644   | h  |
| 6.45850877079314  | 5.93280333120193  | -2.22294154943137  | h  |
| 6.89295361769974  | 2.27070677943915  | 1.36772896479777   | h  |
| -2.10085028011899 | 6.38539476179302  | -8.10802080035403  | sm |
| 2.76646635077664  | 7.53081043224220  | -9.60844112910168  | c  |
| 1.42370992493183  | 6.99850486151856  | -11.90959826688756 | c  |
| -0.36351624031654 | 9.00484242112836  | -12.32115958972950 | c  |
| -0.14008162672162 | 10.76259428008027 | -10.25396078516463 | c  |
| 1.79638143468528  | 9.84819740019378  | -8.58499535513657  | c  |
| -6.59210349828107 | 4.82041168041460  | -6.05092839844509  | c  |
| -6.84093587191485 | 7.51545051475262  | -6.30253264306022  | c  |
| -7.00375669124848 | 8.09873098136835  | -8.95250508852887  | c  |
| -6.82229007280428 | 5.76278402381158  | -10.33697125995913 | c  |
| -6.58054298116479 | 3.74149740596587  | -8.53909253762899  | c  |
| 4.96429816574656  | 6.05280478038100  | -8.56365893371337  | c  |
| 1.95919952169061  | 4.84827533592218  | -13.70722825340407 | c  |
| -1.83552654066752 | 9.42594858969427  | -14.72388634011003 | c  |
| -1.37978628807026 | 13.32291116041607 | -10.06762538720232 | c  |
| 2.81919623353978  | 11.23133352814989 | -6.31337669655619  | c  |
| -6.53834851169669 | 3.36405561701603  | -3.60709174905864  | c  |
| -7.12933918427409 | 9.37670031981445  | -4.16082336027806  | c  |
| -7.73590696951423 | 10.62935883420535 | -10.03738563732907 | c  |
| -7.25126319147829 | 5.41448107588191  | -13.13392972349034 | c  |
| -6.58000814529425 | 0.96189219537928  | -9.15931418929930  | c  |
| 5.08681914641454  | 4.14173996342665  | -9.42013394600706  | h  |
| 6.79605186768556  | 7.02225901163276  | -8.95524580355472  | h  |
| 4.84011178246036  | 5.80157855403479  | -6.47883382138134  | h  |
| 0.27113245145430  | 4.33001481644733  | -14.84598379876003 | h  |
| 3.48052027604744  | 5.35063428990986  | -15.07897933955032 | h  |
| 2.58612128791300  | 3.11067630046556  | -12.70682273589488 | h  |
| -3.55926203123304 | 10.58371097586608 | -14.41628114477785 | h  |
| -0.66550549044988 | 10.45129852629781 | -16.14965953868658 | h  |
| -2.44068168506684 | 7.62756156708620  | -15.62327019838133 | h  |
| -1.90308217798658 | 13.82787708010243 | -8.09390436370742  | h  |
| -0.08127709058894 | 14.84109120928356 | -10.74597428934510 | h  |
| -3.12028293797788 | 13.44630581781688 | -11.22822982843044 | h  |
| 3.63413975390105  | 9.91886547212152  | -4.89228468103364  | h  |
| 4.34969724909379  | 12.57424143553487 | -6.86555383218406  | h  |
| 1.34462212229664  | 12.36295933001421 | -5.33368441662058  | h  |
| -5.87675482169666 | 4.55390076695559  | -2.01264335769636  | h  |
| -8.45869532877660 | 2.65169152845948  | -3.09873249311188  | h  |
| -5.25595798398543 | 1.70030889494993  | -3.69423102838192  | h  |
| -6.55415241836064 | 11.31962835006115 | -4.71701284093580  | h  |
| -9.13348499818236 | 9.50251456294746  | -3.51510706977656  | h  |
| -5.98208028516774 | 8.84925850461346  | -2.48143218037875  | h  |
| -7.07359252046679 | 10.87846852149012 | -12.01355386271630 | h  |
| -9.83450483560852 | 10.84662241681132 | -10.07201097937053 | h  |
| -6.98480242789566 | 12.23596846983742 | -8.91363479435605  | h  |
| -6.02676329003293 | 3.91693910786778  | -13.95947450816504 | h  |
| -9.24257553869101 | 4.83793625374857  | -13.52699662805663 | h  |
| -6.90448514795380 | 7.17568647743974  | -14.21632092962643 | h  |
| -5.59207370904884 | -0.16737744741480 | -7.69154334887247  | h  |
| -8.54782772125706 | 0.21455459088367  | -9.30019178195746  | h  |
| -5.64183243598513 | 0.54785771341755  | -10.99257491908126 | h  |

Send

[ (Cp\*<sub>2</sub>Sm)<sub>2</sub>As<sub>2</sub> (CpMo (CO)<sub>2</sub>)<sub>4</sub> ]

Scoord

|                   |                    |                   |    |
|-------------------|--------------------|-------------------|----|
| 1.98592284741769  | -13.75127382504619 | 7.98402412426843  | h  |
| 0.09647701619365  | -14.80267634810273 | 10.57312938980141 | h  |
| 1.39957082713409  | -13.26703973324806 | 9.94515335722294  | c  |
| 0.12716571159212  | -10.72175646296234 | 10.11567283803937 | c  |
| 3.10596286501576  | -13.38241352792335 | 11.15571784254987 | h  |
| 2.03987160262023  | -6.30801250816317  | 7.99921387252754  | sm |
| 0.29529441006475  | -8.96227872057816  | 12.18723983631180 | c  |
| -1.80057471395440 | -9.83572083821329  | 8.42252472826100  | c  |
| 0.64392506516968  | -6.37560851056694  | 3.64470612026026  | o  |
| 0.51900123568009  | -1.97395811676314  | 8.04437900549019  | o  |
| -2.82633508036074 | -7.53921984699088  | 9.43900237163191  | c  |
| -1.52443845199737 | -6.98874105170700  | 11.75842538703717 | c  |
| 6.55502076842014  | -4.82807247309732  | 5.89217773277213  | c  |
| 6.78071201123498  | -7.51588530100320  | 6.23099974570893  | c  |
| 6.93665507905958  | -8.01308879015399  | 8.89878093026835  | c  |
| 6.76120105646963  | -5.63253438938375  | 10.20640394710744 | c  |
| 6.54263068137181  | -3.66840453991456  | 8.34309263443044  | c  |
| 1.74381907934587  | -9.35381106344895  | 14.60951799823368 | c  |
| -2.77595561142429 | -11.22867425724530 | 6.13646725342218  | c  |
| -0.35232446645318 | -6.08803279486821  | 1.58778957953132  | c  |
| -0.23892245874787 | -0.08313462611921  | 6.97843451087641  | c  |
| -5.03457013931525 | -6.10111361182552  | 8.35724807570598  | c  |
| -2.12038192792569 | -4.86105296151471  | 13.56332565238193 | c  |
| 6.55294712752442  | -3.45198536105459  | 3.40286956175429  | c  |
| 7.06411420079304  | -9.44482401699359  | 4.14954392468206  | c  |
| 7.67385444585642  | -10.50443259745184 | 10.06665468121550 | c  |
| 7.16498206189217  | -5.20179998617375  | 12.99592470803439 | c  |
| 6.57187310310429  | -0.86955045110315  | 8.86837040073399  | c  |
| 3.47241419199808  | -10.51149200780484 | 14.33231424191447 | h  |
| 0.56188038600370  | -10.36426906500903 | 16.03614042096989 | h  |
| 2.33690441358672  | -7.54374374417181  | 15.49428078347226 | h  |
| -3.57318267198061 | -9.92327710751201  | 4.69905697877122  | h  |
| -4.30710807032500 | -12.58043999361232 | 6.66542363196075  | h  |
| -1.27795207848288 | -12.35246113252418 | 5.18382242578089  | h  |
| -2.02604187809379 | -5.84580479785508  | -1.57188392187152 | mo |
| -1.74852692955252 | 2.76975395798907   | 5.40428930680349  | mo |
| -5.35407859668496 | -4.29993227053634  | 9.38448647751774  | h  |
| -6.81753764420704 | -7.21632567812653  | 8.50243514550998  | h  |
| -4.77667603086693 | -5.62809892790708  | 6.32205378981835  | h  |
| -0.44059715228667 | -4.28222896901610  | 14.68477749631746 | h  |
| -3.60760252402103 | -5.42188242943203  | 14.94986677662271 | h  |
| -2.81713086737329 | -3.14613402932777  | 12.57188942254604 | h  |
| 5.87956675938284  | -4.67712167884091  | 1.84011969297248  | h  |
| 8.49184868266464  | -2.79666961068040  | 2.88792982040265  | h  |
| 5.30710571236080  | -1.75623968729696  | 3.42415823518945  | h  |
| 6.48149202372735  | -11.36679359383706 | 4.76675506473405  | h  |
| 9.06775569976042  | -9.59837208982640  | 3.50800055108704  | h  |
| 5.91985291463410  | -8.96679925793949  | 2.45310234774864  | h  |
| 6.98443110672711  | -10.70511131816496 | 12.03881354409797 | h  |
| 9.77390323736441  | -10.69729100155754 | 10.13888753281840 | h  |
| 6.95742795488364  | -12.14902778590332 | 8.97636786187136  | h  |
| 5.95445865012638  | -3.65959915701464  | 13.75743287722473 | h  |
| 9.16045710930908  | -4.64504814052073  | 13.39681961879523 | h  |
| 6.77596549690254  | -6.92243412414120  | 14.12919469792076 | h  |

|                   |                    |                   |    |
|-------------------|--------------------|-------------------|----|
| 5.57670262770809  | 0.22121118364586   | 7.37574638048352  | h  |
| 8.54841024161658  | -0.13720785159205  | 8.96159273003370  | h  |
| 5.65897465729189  | -0.38663493477400  | 10.69704719805617 | h  |
| -0.72992177006800 | -1.31204827616593  | -1.66268667187276 | as |
| 0.63310007862274  | -8.16924001698292  | -2.75062108046670 | c  |
| -5.84453342942891 | -5.74012116539732  | -4.20281164366789 | c  |
| -5.09913438482848 | -8.30745093372592  | -3.80794072454587 | c  |
| -5.27304357841930 | -8.84270305630526  | -1.15007431151808 | c  |
| -6.11458081350523 | -6.57858420678663  | 0.09254196844654  | c  |
| -6.46585016037071 | -4.66827701702646  | -1.79445925592847 | c  |
| 0.72927219617739  | 1.31174938380525   | 1.66243943196575  | as |
| 0.52538958907765  | 4.83342578717217   | 7.51677223845640  | c  |
| -5.80051114645124 | 1.00326229875304   | 5.95032221646292  | c  |
| -5.85138231530964 | 2.15057671298498   | 3.49862291927894  | c  |
| -5.56800232612130 | 4.82241246083016   | 3.82439704572849  | c  |
| -5.31528311532092 | 5.33140790194158   | 6.46813821778132  | c  |
| -5.47309214233445 | 2.96973373566272   | 7.79809676958118  | c  |
| 1.74870670748154  | -2.77015637985956  | -5.40408160448549 | mo |
| 2.03003899060815  | -9.79687510525165  | -3.33896416174822 | o  |
| -5.92519354500430 | -4.77243040275007  | -6.03431859125106 | h  |
| -4.53416221898451 | -9.64372306358052  | -5.29189594442454 | h  |
| -4.91512208772810 | -10.67588920529569 | -0.24777612321086 | h  |
| -6.50608964404033 | -6.37302695979408  | 2.11932981381537  | h  |
| -7.14626837662205 | -2.73674510345322  | -1.46422458723068 | h  |
| 2.02641384058314  | 5.84505186267121   | 1.57120119988533  | mo |
| 1.70050075864471  | 6.03353475281462   | 8.97088586953919  | o  |
| -6.02749638477520 | -1.01811182576475  | 6.35122106881860  | h  |
| -6.08717470581567 | 1.16102295748119   | 1.69195869700607  | h  |
| -5.54009818674824 | 6.24305574582422   | 2.31633579029432  | h  |
| -5.08708948370989 | 7.20800900062622   | 7.32387261652437  | h  |
| -5.43011951963101 | 2.72217804035993   | 9.85761833779305  | h  |
| 0.23889030284866  | 0.08256705626787   | -6.97842524410209 | c  |
| -0.52510575875210 | -4.83397806555377  | -7.51658485982841 | c  |
| 5.80052934893047  | -1.00355049582039  | -5.95030733695785 | c  |
| 5.85153978181022  | -2.15049240041591  | -3.49845222903501 | c  |
| 5.56835334623269  | -4.82238525518479  | -3.82381326563409 | c  |
| 5.31554772021427  | -5.33180700500709  | -6.46747773889009 | c  |
| 5.47322372632928  | -2.97031451532797  | -7.79778678882135 | c  |
| 0.35250553154781  | 6.08691875219631   | -1.58840514093326 | c  |
| -0.63194320377026 | 8.16920634082615   | 2.74983802615336  | c  |
| 5.84484091085946  | 5.73884187143474   | 4.20183539563651  | c  |
| 5.09993922107955  | 8.30633249391287   | 3.80715711716439  | c  |
| 5.27376098530470  | 8.84169575296135   | 1.14931255653008  | c  |
| 6.11486872200637  | 6.57752850334554   | -0.09347353329137 | c  |
| 6.46591600787549  | 4.66705210747572   | 1.79341177961992  | c  |
| -0.51903897509771 | 1.97334651497827   | -8.04452535935503 | o  |
| -1.70012659622706 | -6.03409652682710  | -8.97077751064577 | o  |
| 6.02743864969025  | 1.01773843368463   | -6.35154839280439 | h  |
| 6.08723761836848  | -1.16071004960853  | -1.69193562978286 | h  |
| 5.54039100124342  | -6.24277111779712  | -2.31554186730996 | h  |
| 5.08737719342593  | -7.20852602008320  | -7.32290063324680 | h  |
| 5.43026523731531  | -2.72306329494073  | -9.85732186074632 | h  |
| -0.64388662313401 | 6.37464411226916   | -3.64529573778573 | o  |
| -2.02838485266443 | 9.79736992885150   | 3.33805815716620  | o  |
| 5.92544621666509  | 4.77103673921954   | 6.03324855432054  | h  |
| 4.53526697703636  | 9.64258206509527   | 5.29119779581595  | h  |
| 4.91603214512964  | 10.67494696610910  | 0.24715048324903  | h  |
| 6.50625466251478  | 6.37201848457780   | -2.12024516139213 | h  |
| 7.14602488572743  | 2.73546956651060   | 1.46307806568799  | h  |

|                   |                   |                    |    |
|-------------------|-------------------|--------------------|----|
| -2.04005018175275 | 6.30749133438591  | -7.99967870547884  | sm |
| 2.82637889882145  | 7.53822645154771  | -9.43967787719497  | c  |
| 1.52391253775509  | 6.98885746762935  | -11.75902559509427 | c  |
| -0.29560339192986 | 8.96283525100450  | -12.18670946775952 | c  |
| -0.12675923379010 | 10.72151151110691 | -10.11450376068042 | c  |
| 1.80121813042753  | 9.83450509023305  | -8.42212850538775  | c  |
| -6.55519114354577 | 4.82820430317055  | -5.89259297990932  | c  |
| -6.78011984632746 | 7.51624614865679  | -6.23024799098768  | c  |
| -6.93659563709455 | 8.01456482628906  | -8.89778833868885  | c  |
| -6.76217948795264 | 5.63451451987088  | -10.20642980080731 | c  |
| -6.54370037323761 | 3.66955258202684  | -8.34399261399476  | c  |
| 5.03446409546675  | 6.09938283707579  | -8.35867355784179  | c  |
| 2.11906017992181  | 4.86167555995495  | -13.56477604025526 | c  |
| -1.74461276438093 | 9.35553369784959  | -14.60852276025549 | c  |
| -1.39860669228096 | 13.26700053261067 | -9.94282428251817  | c  |
| 2.77728753215377  | 11.22649872798127 | -6.13579291776310  | c  |
| -6.55299638193764 | 3.45113367120861  | -3.40382287556303  | c  |
| -7.06252334035509 | 9.44443684645584  | -4.14795152839767  | c  |
| -7.67356602594227 | 10.50657451931727 | -10.06439513573004 | c  |
| -7.16694391321655 | 5.20507300764733  | -12.99600203879152 | c  |
| -6.57369573143583 | 0.87089598392651  | -8.87039827061592  | c  |
| 5.35405131054693  | 4.29880661739963  | -9.38692583138264  | h  |
| 6.81743586792024  | 7.21465957214944  | -8.50314170215163  | h  |
| 4.77651193668729  | 5.62521387853496  | -6.32377762142868  | h  |
| 0.43900814592317  | 4.28367886423184  | -14.68626239041770 | h  |
| 3.60622630421739  | 5.42266468618945  | -14.95131102422297 | h  |
| 2.81555229561084  | 3.14622919068025  | -12.57409564023048 | h  |
| -3.47296955579792 | 10.51336020553496 | -14.33044250077543 | h  |
| -0.56287159339002 | 10.36637620736229 | -16.03503686028081 | h  |
| -2.33818344409951 | 7.54590473017017  | -15.49386580715678 | h  |
| -1.98462866146316 | 13.75060940551666 | -7.98143824062358  | h  |
| -0.09527561666035 | 14.80261156692135 | -10.57037599023479 | h  |
| -3.10510155149464 | 13.38316733293550 | -11.15316828399239 | h  |
| 3.57454116052390  | 9.92051479287622  | -4.69895701495283  | h  |
| 4.30856920266151  | 12.57815251554741 | -6.66463595453551  | h  |
| 1.27966570094167  | 12.35024374726926 | -5.18251206074643  | h  |
| -5.87883714197670 | 4.67546183636731  | -1.84076049583874  | h  |
| -8.49202262671743 | 2.79622652651857  | -2.88873553293973  | h  |
| -5.30770940129974 | 1.75496849302254  | -3.42600445534529  | h  |
| -6.47958298069795 | 11.36651157033576 | -4.76454745985427  | h  |
| -9.06598433228473 | 9.59822212980007  | -3.50587086273397  | h  |
| -5.91792719919079 | 8.96546578193830  | -2.45199016916166  | h  |
| -6.98495370602962 | 10.70785610605651 | -12.03677898240747 | h  |
| -9.77359973431000 | 10.70001115845496 | -10.13565572139049 | h  |
| -6.95623441429420 | 12.15054871047398 | -8.97376635041131  | h  |
| -5.95723082450354 | 3.66274457595806  | -13.75854653567581 | h  |
| -9.16275055534055 | 4.64919330994677  | -13.39649066430942 | h  |
| -6.77767621387659 | 6.92603180109646  | -14.12868271824629 | h  |
| -5.57836100296376 | -0.22071505461043 | -7.37848140756374  | h  |
| -8.55042764734027 | 0.13899888043788  | -8.96333152956745  | h  |
| -5.66146372711115 | 0.38849907990357  | -10.69955562934461 | h  |

\$end

**[ (Cp\*<sub>2</sub>Sm)<sub>2</sub>Sb<sub>2</sub>(CpMo(CO)<sub>2</sub>)<sub>4</sub> ]**

\$coord

|                  |                    |                   |   |
|------------------|--------------------|-------------------|---|
| 2.31540542909101 | -13.82129253251507 | 8.80750756255805  | h |
| 0.11439610661820 | -14.58481707829348 | 11.24864312291151 | h |
| 1.44928589759336 | -13.09476849839314 | 10.58018975207914 | c |

|                   |                    |                   |    |
|-------------------|--------------------|-------------------|----|
| 0.08947652975935  | -10.61634883491752 | 10.21807412717048 | c  |
| 2.97320928589865  | -12.95756324267332 | 12.01234390965780 | h  |
| 1.99358525458413  | -6.43616780657854  | 7.67824277906175  | sm |
| -0.03924013239711 | -8.56926792492854  | 12.01116363065776 | c  |
| -1.69030077439142 | -10.09742895407371 | 8.23445161692803  | c  |
| 0.46656033420156  | -6.46871672575208  | 3.37742694742750  | o  |
| 0.87271368761839  | -1.99957573272025  | 8.17075684357924  | o  |
| -2.94669728168567 | -7.76247401394956  | 8.81668425650390  | c  |
| -1.92428600655537 | -6.81390527570337  | 11.14378735249402 | c  |
| 6.51866498933588  | -5.98720700097411  | 5.11577076819490  | c  |
| 6.59559838386687  | -8.44706240939876  | 6.26875672520867  | c  |
| 6.81512944495159  | -8.10168541453772  | 8.95813730530524  | c  |
| 6.80504252375672  | -5.43043239475158  | 9.46597691502590  | c  |
| 6.65163893252593  | -4.12761865234745  | 7.08618442197157  | c  |
| 1.23557789005130  | -8.46146379456264  | 14.55937397031895 | c  |
| -2.34536212543760 | -11.84111361540661 | 6.07482334269755  | c  |
| -0.39957716965715 | -6.35336095535778  | 1.24200010732587  | c  |
| 0.04813502683153  | -0.02907954922848  | 7.31175242609842  | c  |
| -5.10641160981375 | -6.63615352115312  | 7.32857541942838  | c  |
| -2.84154652594177 | -4.53422938168318  | 12.58861172062292 | c  |
| 6.54335019558352  | -5.45227432932200  | 2.32088792799766  | c  |
| 6.73750520449439  | -10.93195770089706 | 4.87424631334853  | c  |
| 7.50634392381966  | -10.12843338894581 | 10.83552155383947 | c  |
| 7.21955784695578  | -4.21506619080098  | 12.01193869230814 | c  |
| 6.86861745213996  | -1.31545711870877  | 6.69967832361847  | c  |
| 2.98882108570736  | -9.61201885062787  | 14.62196164733813 | h  |
| -0.03016385372773 | -9.20023341734789  | 16.07729655746832 | h  |
| 1.75234856869324  | -6.50098101437489  | 15.11628829534905 | h  |
| -2.75409944912351 | -10.79681076971286 | 4.29755190615624  | h  |
| -4.05151400259700 | -13.00176428954908 | 6.51829446635554  | h  |
| -0.79088172506974 | -13.18895555893163 | 5.65718917444843  | h  |
| -1.92905621208878 | -6.40007042886741  | -2.00196392930634 | mo |
| -1.59977752244299 | 2.90404517973212   | 6.04086448394910  | mo |
| -6.25230267169188 | -5.34237218075899  | 8.52036832849165  | h  |
| -6.40831542413839 | -8.14100987778631  | 6.64357348711990  | h  |
| -4.49356841521703 | -5.54597338655401  | 5.63162965685345  | h  |
| -1.31460692504416 | -3.64997628144957  | 13.72825024336562 | h  |
| -4.38064479805357 | -5.05361417841803  | 13.93428852959787 | h  |
| -3.59638597871846 | -3.03903242374097  | 11.32555450914737 | h  |
| 5.76087606295710  | -7.05852434236181  | 1.22010205124838  | h  |
| 8.50792071965018  | -5.12054711736992  | 1.62676410872171  | h  |
| 5.41376445384861  | -3.75118668717809  | 1.82000497335198  | h  |
| 6.03974317070081  | -12.53605826110677 | 6.03737826337104  | h  |
| 8.72209358539929  | -11.39885282881766 | 4.33019237070798  | h  |
| 5.61575530080328  | -10.91428722662430 | 3.09791480865686  | h  |
| 6.71561877193706  | -9.77418992484316  | 12.74825672362062 | h  |
| 9.60172750787595  | -10.23174472957485 | 11.06210554100828 | h  |
| 6.87149952829273  | -12.03139851382348 | 10.22588027454879 | h  |
| 6.26143284760426  | -2.35147717563952  | 12.16927399980739 | h  |
| 9.26979206868964  | -3.87446573281801  | 12.37867942658031 | h  |
| 6.51932977584150  | -5.41575941507601  | 13.58668442280502 | h  |
| 5.72374155475738  | -0.64358204488973  | 5.06656706024870  | h  |
| 8.86615576740500  | -0.75653953614737  | 6.31413295249441  | h  |
| 6.23679151488708  | -0.23037978835201  | 8.38179656230433  | h  |
| -1.03305346413286 | -1.42874922511969  | -1.98190091767834 | sb |
| 1.02625766308871  | -8.38930422405805  | -3.07328883420761 | c  |
| -5.76621440345911 | -6.54228037974932  | -4.57945861225122 | c  |
| -4.67435436751533 | -9.01023923723257  | -4.48014547599713 | c  |
| -4.71215622343998 | -9.84729813522717  | -1.89168161994144 | c  |

|                   |                    |                    |    |
|-------------------|--------------------|--------------------|----|
| -5.82684370573324 | -7.87078394489665  | -0.40304456603827  | c  |
| -6.48167157774706 | -5.83337140516949  | -2.06227869636134  | c  |
| 1.04066737166481  | 1.43513260004937   | 1.98248654387444   | sb |
| 0.74104114413049  | 4.92721588799179   | 8.11238562392148   | c  |
| -5.51520255204790 | 1.01650600817004   | 6.97023604432187   | c  |
| -5.80392564349471 | 2.01677028278179   | 4.46877359577216   | c  |
| -5.60224949524544 | 4.70992639422967   | 4.62964979117106   | c  |
| -5.18507856162893 | 5.38071918703394   | 7.21553344135979   | c  |
| -5.13956346542087 | 3.09299655139892   | 8.68092384613785   | c  |
| 1.60915130102447  | -2.90072297168838  | -6.03836497936520  | mo |
| 2.61303190678493  | -9.86171200508762  | -3.58910812391209  | o  |
| -6.01753458658260 | -5.39877877190349  | -6.29054527085039  | h  |
| -3.96452768736006 | -10.08452468885942 | -6.10705434210438  | h  |
| -4.08656552088122 | -11.69887918401888 | -1.19622494556664  | h  |
| -6.18769719853463 | -7.93865688556565  | 1.63863975188258   | h  |
| -7.43050003530499 | -4.07162912013218  | -1.51463572198748  | h  |
| 1.93243460804701  | 6.40772334566322   | 2.00465955583805   | mo |
| 1.97533989203538  | 6.08689979869129   | 9.55142428329203   | o  |
| -5.63182556569093 | -0.98709053200034  | 7.49244026763150   | h  |
| -6.16351027294892 | 0.91959758901801   | 2.74563578280128   | h  |
| -5.74641447743714 | 6.03534952831031   | 3.04516582642485   | h  |
| -4.97813325092978 | 7.31153120935207   | 7.94573413677846   | h  |
| -4.93727506837626 | 2.96146877117107   | 10.74147254472720  | h  |
| -0.03062205471595 | 0.03794366459902   | -7.30676488907010  | c  |
| -0.73522640612649 | -4.91681416854173  | -8.11214033994213  | c  |
| 5.52580032412228  | -1.02022104205399  | -6.97652341301760  | c  |
| 5.81681111756965  | -2.01622209845138  | -4.47357508057205  | c  |
| 5.61112361570866  | -4.70932788255918  | -4.62913056109527  | c  |
| 5.18941270036855  | -5.38443354494463  | -7.21324854912728  | c  |
| 5.14510830431691  | -3.09931944853845  | -8.68282267883983  | c  |
| 0.39237629613311  | 6.36533003637813   | -1.23440870795265  | c  |
| -1.01903843665899 | 8.39731028168279   | 3.08693196608047   | c  |
| 5.77606218929524  | 6.53845266564417   | 4.57305259854486   | c  |
| 4.68767299930745  | 9.00824895281286   | 4.48204216757274   | c  |
| 4.72003098311635  | 9.85104830421416   | 1.89531448118463   | c  |
| 5.82832363507720  | 7.87635968015814   | 0.39944582398997   | c  |
| 6.48437899643290  | 5.83434004895405   | 2.05245294187366   | c  |
| -0.84733510674033 | 2.01166253754938   | -8.16512714536323  | o  |
| -1.97087159426025 | -6.07290472311842  | -9.55326809941947  | o  |
| 5.64426043718532  | 0.98228168552276   | -7.50266861365643  | h  |
| 6.18024921957688  | -0.91620510361798  | -2.75305666512173  | h  |
| 5.75571397311250  | -6.03198084761539  | -3.04238086982238  | h  |
| 4.97902410917193  | -7.31636769681020  | -7.93969756809728  | h  |
| 4.94007094898519  | -2.97135370826301  | -10.74337293449876 | h  |
| -0.48223501753506 | 6.48196824085922   | -3.36638275545045  | o  |
| -2.60411780118159 | 9.86884497912979   | 3.60976877068019   | o  |
| 6.02991869374976  | 5.39048859932816   | 6.28079024034494   | h  |
| 3.98333145278160  | 10.07972181872394  | 6.11313232010704   | h  |
| 4.09563918397130  | 11.70515597481991  | 1.20555379172075   | h  |
| 6.18454513794783  | 7.94850077565158   | -1.64291414023544  | h  |
| 7.42919862135760  | 4.07238677898545   | 1.49847020336875   | h  |
| -1.99445074815774 | 6.44072880610326   | -7.67307192214926  | sm |
| 2.94273938621475  | 7.78143039121762   | -8.80677381095545  | c  |
| 1.92135626555784  | 6.84313046404142   | -11.13864044519096 | c  |
| 0.03327255621860  | 8.59995506908259   | -11.99649316375313 | c  |
| -0.09871450715964 | 10.63725807834865  | -10.19247351741411 | c  |
| 1.68282842267959  | 10.11138559110717  | -8.21238542650343  | c  |
| -6.52755948849702 | 5.93338323530435   | -5.13716780021728  | c  |
| -6.61362216938959 | 8.40735622028541   | -6.25919562799728  | c  |

|                   |                   |                    |   |
|-------------------|-------------------|--------------------|---|
| -6.82013984521060 | 8.09521090690507  | -8.95338956913751  | c |
| -6.79287741049338 | 5.43049079594991  | -9.49514112096810  | c |
| -6.64244902540238 | 4.09828363584051  | -7.13157900700677  | c |
| 5.10333823835379  | 6.65056367315119  | -7.32351406904434  | c |
| 2.84103640430228  | 4.57181197171595  | -12.59514377468851 | c |
| -1.23974225861036 | 8.50505340803894  | -14.54606179771494 | c |
| -1.46481878086731 | 13.11435322195377 | -10.53989509380058 | c |
| 2.33532918057954  | 11.84536162631267 | -6.04434705250557  | c |
| -6.55966024766926 | 5.36464155265453  | -2.34895862917593  | c |
| -6.77241877452693 | 10.87361329973190 | -4.83352999577364  | c |
| -7.51477829818924 | 10.14221790145770 | -10.80731066901302 | c |
| -7.19241681636572 | 4.24475101511625  | -12.05741760392392 | c |
| -6.84728513747016 | 1.28040215862481  | -6.78239475753041  | c |
| 6.23386266015512  | 5.34128945417955  | -8.51279309593233  | h |
| 6.41937089973739  | 8.15100240202650  | -6.65564116162915  | h |
| 4.49229661340945  | 5.57567155756786  | -5.61623643012622  | h |
| 1.31350452996266  | 3.68781658559740  | -13.73422849648366 | h |
| 4.37510388432771  | 5.10062334291580  | -13.94288071477505 | h |
| 3.60329277914214  | 3.07362963489750  | -11.34015221042531 | h |
| -3.00037309408793 | 9.64467618638900  | -14.60056332137905 | h |
| 0.02210852444422  | 9.26461132020749  | -16.05698822421207 | h |
| -1.74336360649104 | 6.54589053943802  | -15.11898630948962 | h |
| -2.33298141160690 | 13.82792133132970 | -8.76288169006176  | h |
| -0.13371198599646 | 14.61196919139979 | -11.19892385694187 | h |
| -2.98824275202536 | 12.98183749380575 | -11.97299057947472 | h |
| 2.76259664956557  | 10.79181723337694 | -4.27699164479358  | h |
| 4.02926685388922  | 13.02323465677267 | -6.48913769029485  | h |
| 0.77226340901618  | 13.17744983385458 | -5.60824991918061  | h |
| -5.79250115907262 | 6.96345668762299  | -1.22673749331271  | h |
| -8.52431933860368 | 5.01129127687910  | -1.66607210249884  | h |
| -5.41968381167862 | 3.66601483931805  | -1.86313672289408  | h |
| -6.08625262697584 | 12.49690490556703 | -5.97671546373383  | h |
| -8.75996973041965 | 11.31968838195001 | -4.28294755251526  | h |
| -5.64966733484473 | 10.84203043128298 | -3.05792036666444  | h |
| -6.71902861233879 | 9.81377753235245  | -12.72244453286262 | h |
| -9.61004063774157 | 10.24094309816377 | -11.03683263863740 | h |
| -6.88757704931609 | 12.03990743686323 | -10.17376076064655 | h |
| -6.22432793941327 | 2.38798953456492  | -12.23432129872839 | h |
| -9.23959500647092 | 3.89806612709959  | -12.43540016699093 | h |
| -6.49293940432768 | 5.46833994161944  | -13.61460499487616 | h |
| -5.72145345987323 | 0.59598590871732  | -5.14164989817577  | h |
| -8.84672951328184 | 0.70538349839691  | -6.43189355873427  | h |
| -6.18557658084915 | 0.21936825083282  | -8.46832220307414  | h |

\$end

**P<sub>2</sub>**

\$scoord

|                   |                  |                  |   |
|-------------------|------------------|------------------|---|
| -1.81034108906079 | 0.00000000000000 | 0.00000000000000 | p |
| 1.81034108906079  | 0.00000000000000 | 0.00000000000000 | p |

\$end

**As<sub>2</sub>**

\$scoord

|                   |                  |                  |    |
|-------------------|------------------|------------------|----|
| 2.00549790902095  | 0.00000000000000 | 0.00000000000000 | as |
| -2.00549790902095 | 0.00000000000000 | 0.00000000000000 | as |

\$end



## Sb<sub>2</sub>

```
$coord
  2.39729052760246      0.0000000000000000      0.0000000000000000      sb
 -2.39729052760246      0.0000000000000000      0.0000000000000000      sb
$end
```

## References

1. W. J. Evans and T. A. Ulibarri, *Inorg. Synth.*, 1990, **27**, 155-157.
2. T. Li, M. T. Gamer, M. Scheer, S. N. Konchenko and P. W. Roesky, *Chem. Commun.*, 2013, **49**, 2183-2185.
3. a) G. Sheldrick, *Acta Crystallogr., Sect. A*, 2008, **64**, 112-122; b) G. Sheldrick, *Acta Crystallogr., Sect. C*, 2015, **71**, 3-8.
4. O. V. Dolomanov, L. J. Bourhis, R. J. Gildea, J. A. K. Howard and H. Puschmann, *J. Appl. Cryst.*, 2009, **42**, 339-341.
5. TURBOMOLE 7.0, TURBOMOLE GmbH 2015. University of Karlsruhe and Forschungszentrum Karlsruhe, 1989-2007, TURBOMOLE GmbH since 2007.
6. a) A. D. Becke, *Phys. Rev. A*, 1988, **38**, 3098-3100; b) J. P. Perdew, *Phys. Rev. B*, 1986, **33**, 8822-8824; c) M. Sierka, A. Hogekamp and R. Ahlrichs, *J. Chem. Phys.*, 2003, **118**, 9136-9148; d) J. P. Perdew, *Physical Review B*, 1986, **34**, 7406-7406; e) O. Treutler and R. Ahlrichs, *J. Chem. Phys.*, 1995, **102**, 346-354; f) R. Ahlrichs, M. Bär, M. Häser, H. Horn and C. Kölmel, *Chem. Phys. Lett.*, 1989, **162**, 165-169.
7. a) F. Weigend and R. Ahlrichs, *Phys. Chem. Chem. Phys.*, 2005, **7**, 3297-3305; b) F. Weigend, *Phys. Chem. Chem. Phys.*, 2006, **8**, 1057-1065.
8. D. Andrae, U. Häußermann, M. Dolg, H. Stoll and H. Preuß, *Theor. Chim. Acta*, 1990, **77**, 123-141.
9. M. Dolg, H. Stoll, A. Savin and H. Preuss, *Theor. Chim. Acta*, 1989, **75**, 173-194.
10. a) R. Heinzmann and R. Ahlrichs, *Theor. Chim. Acta*, 1976, **42**, 33-45; b) R. Ahlrichs and C. Ehrhardt, *Chem. Unserer Zeit*, 1985, **19**, 120-124.
